# Supplementary material
Source: PubMed Central journal article supplement (PMC1866039)
Supplement: jvirol_81_7_3477__1.pdf [file jvirol_81_7_3477__1.pdf]

Supplemental Table 1 new.xls

| Entrez Gene  | Affymetrix Probe ID | Entrez Gene ID | Gene                                                                      | Fwd Primer Name    | Fwd Primer Sequence          | Rev Primer Name    | Rev Primer Sequence               | Match to qPCR | IFNα2b inducible | In SAM CD4 list | In SAM CD8 list |
|--------------|---------------------|----------------|---------------------------------------------------------------------------|--------------------|------------------------------|--------------------|-----------------------------------|---------------|------------------|-----------------|-----------------|
| TOP2A        | 201292_at           | 7153           | topoisomerase (DNA) II alpha 170kDa                                       | HsTOP2A:F2         | AAGCAACTAAAGGGATCCAGCTT      | HsTOP2A:R2         | TCTTGGTTTTGGCAGGATCAG             | match         | no               | Up              | Up              |
| UBE2L6       | 201649_at           | 9246           | ubiquitin-conjugating enzyme E2L 6                                        | HsUBE2L6:F1        | CACGGTAGTGACCAATCTGAAG       | HsUBE2L6:R1        | GGATGGCAAGTGGTTTTGAAA             | match         | no               | Up              | Up              |
| RRM2         | 201890_at           | 6241           | ribonucleotide reductase M2 polypeptid                                    | HsRRM2:F1          | GCTGAGACATTGGCATGAAAAGA      | HsRRM2:R1          | ATTAACAAATGGGGCCAAAA              | match         | no               | Up              | Up              |
| MX1          | 202086_at           | 4599           | myxovirus (influenza virus) resistance 1, interferon-inducible protein 1  | HsMX1:F6           | CGGGTAGCCACTGGACGTA          | HsMX1:R6           | AACGGATAAGCAGACGACGAGTA           | match         | no               | Up              | Up              |
| BIRC5        | 202095_s_at         | 332            | baculoviral IAP repeat-containing 5 (survivin)                            | HsBIRC5:F1         | TAGGAAGCGCTTGGCAGACTACTC     | HsBIRC5:R1         | GCGTCACTGGGCGCTGTCTAA             | match         | no               | Up              | Up              |
| LY6E         | 202145_at           | 4061           | lymphocyte antigen 6 complex, locus E                                     | HsLY6E:F1          | TTTCCACCCCTGTTTTCTTCC        | HsLY6E:R1          | TTGCAGACCCCAATCTGCTT              | match         | no               | Up              | Up              |
| GBP1         | 202270_at           | 2633           | guanylate binding protein 1, interferon-inducible, 67kDa OR guanylat      | HsGBP1:F1          | CAAGCTAAAGCAAAACCCTT         | HsGBP1:R1          | GTGTTTTCTTCCACTTCCCT              | match         | no               | Up              | Up              |
| PLSCR1       | 202446_s_at         | 5359           | phospholipid scramblase 1                                                 | HsPLSCR1:F1        | AAGAAGACACATTTTAAATCTCCTTCA  | HsPLSCR1:R1        | TGTAAGAGCTAAACATTTCATGAGAAATATTAA | match         | no               | Up              | Up              |
| TYMS         | 202589_at           | 7298           | thymidylate synthetase                                                    | HsTYMS:F1          | TGAAGAAAGTAGGGAGAAATGAAATG   | HsTYMS:R1          | CGTGGGATTGAAATGCACATAC            | match         | no               | Up              | Up              |
| OAS1         | 202869_at           | 4938           | 2',5'-oligoadenylate synthetase 1, 40/46kDa                               | HsOAS1:F1          | TATAGTGACAGCGCTGCTCCATATT    | HsOAS1:R1          | GGGATGTGAAAATCCAGAAACC            | match         | no               | Up              | Up              |
| IFIT1        | 203153_at           | 3434           | interferon-induced protein with tetratricopeptide repeats 1 OR interfe    | HsIFIT1:100f       |                              | HsIFIT1:169r       |                                   | match         | no               | Up              | Up              |
| PTTG1        | 203554_x_at         | 9232           | pituitary tumor-transforming 1                                            | HsPTTG1:F2         | CATGATCCTTGACGAGGAGA         | HsPTTG1:R2         | GAGAGGGCATCTTCCACAGT              | match         | no               | Up              | Up              |
| EIF2AK2      | 204211_x_at         | 5610           | eukaryotic translation initiation factor 2-alpha kinase                   | HsPRKR:F10         | CCACCCTAAGTATTTTTGTGTTTTTA   | HsPRKR:R10         | GGATTACTTGGAGCTCAGGATTTGAG        | match         | no               | Up              | Up              |
| IF1P3        | 204415_at           | 2537           | interferon, alpha-inducible protein (clone IF1-6-1f)                      | HsIF1P3:F5         | GGCTACGCCACCACCAAG           | HsIF1P3:R5         | CTGGGAGCTGCTGGCTACTC              | match         | no               | Up              | Up              |
| IFI44L       | 204439_at           | 10964          | interferon-induced protein 44-like                                        | HsC1orf29:F1       | AGTTCAAAGCCCAAAACCCTG        | HsC1orf29:R1       | AAATATGAGGGGGTGGTTTG              | match         | yes              | Up              | Up              |
| IFIT3        | 204747_at           | 3437           | interferon-induced protein with tetratricopeptide repeats                 | HsIFIT4:F1         | ATCTGAGCTTGAGGATGGTAGTGA     | HsIFIT4:R1         | CTCTCTGGGACTGGAGCTGACT            | match         | no               | Up              | Up              |
| OAS2         | 204972_at           | 4939           | 2'-5'-oligoadenylate synthetase 2, 69/71kDa                               | HsOAS2:F1          | GACACCAGGAAGTTGTGGAGCTA      | HsOAS2:R1          | TTACAGGATCTATGGCTTCTGGAT          | match         | yes              | Up              | Up              |
| MX2          | 204994_at           | 4600           | myxovirus (influenza virus) resistance 2 (mouse)                          | HsMX2:F3           | CACCTAGCAAGTAGTGCTGTGT       | HsMX2:R3           | GGCCTGGCTTGAAGCAATA               | match         | no               | Up              | Up              |
| SCO2         | 205241_at           | 9997           | SCO cytochrome oxidase deficient homolog 2 (yeast)                        | HsSCO2:F1          | TACATCGTGGACCACTCCAT         | HsSCO2:R1          | GGCCGTAGTAATCCGTAAG               | match         | no               | Up              | Up              |
| G1P2         | 205483_s_at         | 9636           | interferon, alpha-inducible protein (clone IF1-15k)                       | HsG1P2:F1          | GGTGAACAATGCGACGAA           | HsG1P2:R1          | TGCTGCGGCCCTTGTAT                 | match         | no               | Up              | Up              |
| LAMP3        | 205569_at           | 27074          | lysosomal-associated membrane protein 3                                   | HsLAMP3:F2         | HsLAMP3:F2                   | HsLAMP3:R2         | GGCAGGCTGCTCTACAGAA               | match         | no               | Up              | Up              |
| OASL         | 205660_at           | 8638           | 2'-5'-oligoadenylate synthetase-like                                      | HsOASL:F5          | TGCCATCTGCTCAGAACTCA         | HsOASL:R5          | GGGACCTCCCGATAGACAA               | match         | no               | Up              | Up              |
| CD38         | 205692_s_at         | 952            | CD38 antigen (p45)                                                        | HsCD38:F1          | CCTGCAAGTTTCTCAGTGTGA        | HsCD38:R1          | CCACAGCACTGGCTCAGA                | match         | no               | Up              | Up              |
| BIRC4BP      | 206133_at           | 54739          | XIAP associated factor-1                                                  | HsHSXIAPAF1:F2     | TTGCTGGTGGCTTGTGAA           | HsHSXIAPAF1:R2     | GTTCCTGCCAAACCTTTCTTTTAAA         | match         | no               | Up              | Up              |
| LAG3         | 206486_at           | 3902           | lymphocyte-activation gene 3                                              | HsLAG3:F1          | GACAAGCAAGCTTTGTGG           | HsLAG3:R1          | GCCAAAGCTTGGAAACTC                | match         | no               | Up              | Up              |
| AIM2         | 206513_at           | 9447           | absent in melanoma 2                                                      | HsAIM2:F2          | GCCTCAGTGTGTAGATGC           | HsAIM2:R2          | GTTCACGGGGACATTAACCT              | match         | no               | Up              | Up              |
| CCR5         | 206991_s_at         | 1234           | chemokine (C-C motif) receptor 5                                          | HsCCR5:F3          | GGTGAAGCTTGTGGCTCA           | HsCCR5:R3          | CAACCTTAAGCAAAAAGGAAGCAATT        | match         | no               | Up              | Up              |
| IFI16        | 208965_s_at         | 3428           | interferon, gamma-inducible protein 1f                                    | HsIFI16:F2         | GAAAGCCAGCACTAGTCCAGTA       | HsIFI16:R2         | CTGCAAGATAACAAGGAAAAGG            | match         | no               | Up              | Up              |
| IFI35        | 209417_s_at         | 3430           | interferon-induced protein 3f                                             | HsIFI35:F3         | CCCCCAAGTTCCTCACA            | HsIFI35:R3         | GGTGAACATACAGACCTATATGG           | match         | no               | Up              | Up              |
| STAT1        | 209969_s_at         | 6772           | signal transducer and activator of transcription 1, 91kD                  | HsSTAT1:F2         | GAGAAGCTCATATTTTCGCTGATA     | HsSTAT1:R2         | AGGAGAGAGATGGAACCAATTCGA          | match         | no               | Up              | Up              |
| MT1F         | 213629_x_at         | 4494           | metallothionein 1F (functional)                                           | HsMT1F:F1          | AGGCAACCTTTCTCCAGA           | HsMT1F:R1          | GTAGCAAAATGGCTCAAGTG              | match         | yes              | Up              | Up              |
| RSAD2        | 213797_at           | 91543          | radical S-adenosyl methionine domain containing                           | HsCig5:F2          | AGAAAGCAAGCATAGGAAAATG       | HsCig5:R2          | GGGATTTTCCCAAGGAGGAT              | match         | no               | Up              | Up              |
| IFI44        | 214453_s_at         | 10561          | interferon-induced protein 4f                                             | HsIFI44:F2         | TGGCCCTGTAAAGGATGTC          | HsIFI44:R2         | GAAGTCATCTGACGCCATA               | match         | yes              | Up              | Up              |
| LAP3         | 217933_s_at         | 51056          | leucine aminopeptidase 3                                                  | HsLAP3:F2          | CATTGAGTCTTACTCGTTTCAGTCA    | HsLAP3:R2          | GTCCAATTAAGCAGAGTGAAGACATT        | match         | no               | Up              | Up              |
| OAS3         | 218400_at           | 4940           | 2'-5'-oligoadenylate synthetase 3, 100kDa                                 | HsOAS3:F2          | CCTGAGGCTGGTACGCTAA          | HsOAS3:R2          | CACCTAGTTCATTTGCTGATTA            | match         | no               | Up              | Up              |
| PARP12       | 218543_s_at         | 64761          | poly (ADP-ribose) polymerase family, member 12                            | HsFLJ22693:F2      | GGAGCTACTTTGCCGAGATG         | HsFLJ22693:R2      | GGGCTCGGTGTCGGATT                 | match         | no               | Up              | Up              |
| C22orf18     | 218741_at           | 79019          | chromosome 22 open reading frame 18                                       | HsMGCC861:F1       | GCTCTGCTGCTACTCATAA          | HsMGCC861:R1       | TCAGCCCTGACTGGACAT                | match         | no               | Up              | Up              |
| HERC6        | 219352_at           | 55008          | hect domain and RLD 6                                                     | HsFLJ20637:F1      | GTCCATTCAGGACCTTCAT          | HsFLJ20637:R1      | CAATCAGCCCTGATGGT                 | match         | yes              | Up              | Up              |
| FLJ23235     | 220169_at           | 80008          | hypothetical protein FLJ23235                                             | HsFLJ23235:F1      | GAAAGGGCCCTGGTTGTTTA         | HsFLJ23235:R1      | GGTGTCAAAGGGCAGCAAA               | match         | yes              | Up              | Up              |
| DNAPTP6      | 222154_s_at         | 26010          | DNA polymerase-transactivated protein 6                                   | HsDKFPZ564A2416:F1 | TCCGATATGGTTGTGTCATC         | HsDKFPZ564A2416:R1 | GATCAAGCAAGCCATGAAA               | match         | yes              | Up              | Up              |
| MCM6         | 201930_at           | 4175           | MCM6 minichromosome maintenance deficient 6 (MIS5 homolog, S)             | HsMCM6:F2          | GCATTAAGAGGAGCGAGCTTG        | HsMCM6:R2          | TCTTCTCAGAGTCTATCTCTGATCGA        | match         | no               | NC              | Up              |
| 2 OR PALM2-A | 202760_s_at         | 17 OR 44f      | A kinase (PRKA) anchor protein 2 OR PALM2-AKAP2 protein                   | HsAKAP2:F1         | CAGAGTGACCTGGCCACTTG         | HsAKAP2:R1         | AGAAAATTCACCTCCACTCTGTAAG         | match         | no               | NC              | Up              |
| LGAL59       | 203236_s_at         | 3965           | lectin, galactoside-binding, soluble, 9 (galectin 5)                      | HsLGAL59:F1        | GCCTGGGACTTGGGCTTAA          | HsLGAL59:R1        | GCCAGAAGCGCCAGCAGCA               | match         | no               | NC              | Up              |
| SLC25A20     | 203658_at           | 788            | solute carrier family 25 (carnitine/acylcarnitine translocase), member 20 | HsSLC25A20:F2      | AGCCTAATTTCTGGGAGCA          | HsSLC25A20:R2      | TGGGACTGCTCCACTGTGT               | match         | no               | NC              | Up              |
| RARRES3      | 204070_at           | 5920           | retinoic acid receptor responder (tazarotene induced)                     | HsRARRES3:F1       | TCACCAACAGCTTGGACCAT         | HsRARRES3:R1       | CTCTCTCGCAGAACTGATGA              | match         | no               | NC              | Up              |
| APOBEC3G     | 204205_at           | 60489          | apolipoprotein B mRNA editing enzyme, catalytic polypeptide-like 3C       | HsAPOBEC3G:F1      | CTGTACCAAGCCATCCAG           | HsAPOBEC3G:R1      | ACTTGGTCCAGGATGTCATG              | match         | no               | NC              | Up              |
| CCR1         | 205098_at           | 1230           | chemokine (C-C motif) receptor 1                                          | HsCCR1:F1          | TGCTTGCAACAAACATTAACCC       | HsCCR1:R1          | GCTTAGGAGCTCACTTGAATGG            | match         | no               | NC              | Up              |
| CX3CR1       | 205898_at           | 1524           | chemokine (C-X3-C motif) receptor 1                                       | HsCX3CR1:F1        | CATTGATGCTGGCCCAACC          | HsCX3CR1:R1        | TGTTTCCAAACCTTTCTAGGG             | match         | no               | NC              | Up              |
| APOBEC3B     | 206632_s_at         | 9582           | apolipoprotein B mRNA editing enzyme, catalytic polypeptide-like 3B       | HsAPOBEC3B:F2      | CAGACGGTTCACCACCATCTC        | HsAPOBEC3B:R2      | TCAGGAGCAATGCTTTTCC               | match         | no               | NC              | Up              |
| YARS         | 212048_s_at         | 8565           | tyrosyl-tRNA synthetase                                                   | HsYARS:F2          | AGCATCAGGCAAGATGAATG         | HsYARS:R2          | GGAGAAGTACCCCAACCCTC              | match         | no               | NC              | Up              |
| CHI3L2       | 213060_s_at         | 1117           | chitinase 3-like 2 OR chitinase 3-like 1                                  | HsCHI3L2:F1        | TTCCCAAGCTTTCTCGACTT         | HsCHI3L2:R1        | GTCACACGCTGCAAGAAAAC              | match         | no               | NC              | Up              |
| PRF1         | 214617_at           | 5551           | perforin 1 (pore forming protein) OR perforin 1 (pore forming protein)    | HsPRF1:F2          | ACTGGTTCCAAATGCCTAA          | HsPRF1:R2          | GCTGTAAGCTGTGATGCTG               | match         | no               | NC              | Up              |
| C1orf41      | 215691_x_at         | 51668          | chromosome 1 open reading frame 41                                        | HsLOC51668:F1      | CATGATAGGCTCCGCTACTTA        | HsLOC51668:R1      | GCAAAATGATCAAGGGCTGA              | match         | no               | NC              | Up              |
| TRAFD1       | 32524_at            | 10906          | TRAF-type zinc finger domain containing 1                                 | HsFLN29:F2         | GTGGGAAGGGAGGGAAGATT         | HsFLN29:R2         | ACAGGGCAGGAATCACCTT               | match         | no               | NC              | Up              |
| SOCS1        | 210001_s_at         | 8651           | suppressor of cytokine signaling 1                                        | HsSOCS1:F2         | TGGTGGCCCTGGTTGT             | HsSOCS1:R2         | TGTGCAAGATCACTGGGTATATGATAA       | match         | yes              | NC              | NC              |
| PTP4A1       | 200731_s_at         | 7803           | protein tyrosine phosphatase type IVA, member 1                           | HsPTP4A1:F2        | GGCGTGGCTTCCAAAGAT           | HsPTP4A1:R2        | TAGGCACCCCAATTTTGAATG             | match         | no               | Dawn            | Down            |
| ZNF291       | 209741_x_at         | 49855          | zinc finger protein 291                                                   | HsZNF291:F2        | GCCTTGGTTCCTCCAGACT          | HsZNF291:R2        | AGGCCCTGCTGAGAAATCT               | match         | no               | NC              | Down            |
| TCF7L2       | 212762_s_at         | 6934           | transcription factor 7-like 2 (T-cell specific, HMG-box)                  | HsTCF7L2:F1        | TACTGTTAGCGCTGTAAC           | HsTCF7L2:R1        | GGGGCAAAATTAAGAAAATGA             | match         | no               | NC              | Down            |
| RASSF3       | 212870_at           | 283349         | Ras association (RalGDS/AF-6) domain family 3                             | HsC14orf138:F2     | AAATTTCCATGCGGAGCTTTAA       | HsC14orf138:R2     | TCACATCTTAAITTCACCAAGTGT          | match         | no               | NC              | Down            |
| PLCB1        | 213222_at           | 23236          | phospholipase C, beta 1 (phosphoinositide-specific)                       | HsPLCB1:F1         | ATTTAATGTTGGAGCTGTGC         | HsPLCB1:R1         | GTCCAAACGTTCAATCCATC              | match         | no               | NC              | Down            |
| KLF11        | 218486_at           | 8462           | Kruppel-like factor 11                                                    | HsTIEG2:F1         | CCACCTCCATTTGTCTGTTG         | HsTIEG2:R1         | ATCCGGAATCCATCACCAAG              | match         | no               | NC              | Down            |
| C14orf169    | 219526_at           | 79697          | chromosome 14 open reading frame 169                                      | HsFLJ21802:F1      | GCTGCTGCTCACTAAGATGC         | HsFLJ21802:R1      | CTACTGCTGTTTCCAGCA                | match         | no               | NC              | Down            |
| JMJD1C       | 221763_at           | 221037         | jumonji domain containing 1C                                              | HsJMJD1C:F1        | ACCAGCTATTGCGCTGACTC         | HsJMJD1C:R1        | GACATGACTGCTGCGGAT                | match         | no               | NC              | Down            |
| IRF7         | 208436_s_at         | 3665           | interferon regulatory factor 7                                            | HsIRF7:F6          | GCCTGGACCTGGTTCAACA          | HsIRF7:R6          | CAGCGTCGCTGGTATGG                 | partial       | no               | Up              | Up              |
| PSMB10       | 202659_at           | 5699           | proteasome (prosome, macropain) subunit, beta type, 11                    | HsPSMB10:F2        | TGGAGCTATGGAGAAACCTGTG       | HsPSMB10:R2        | TCCCCCTTGTCCCAAGCTCT              | partial       | no               | NC              | Up              |
| DNB2 OR LHX1 | 203409_at           | 43 OR 80       | damage-specific DNA binding protein 2, 48kDa OR LIM homeobox 1            | HsDNB2:F1          | TGCTCCAGATGGTGGACACA         | HsDNB2:R1          | CCTTGGTTCAGGCTAGATACAGA           | partial       | no               | NC              | Up              |
| PYCARD       | 221666_s_at         | 29108          | PYD and CARD domain containing 1                                          | HsASC:F2           | CTAGCGGATGGAGACGATCA         | HsASC:R2           | ACTGAAGAGCTCCGCACT                | partial       | no               | NC              | Up              |
| SOCS5        | 208127_s_at         | 9655           | suppressor of cytokine signaling 5                                        | HsSOCS5:F2         | TATTGGTTGGGACCATCT           | HsSOCS5:R2         | CTTCAATCCCAATTTGCTT               | partial       | no               | NC              | Down            |
| ZFP36L1      | 211962_s_at         | 677            | zinc finger protein 36, C3H type-like 1                                   | HsZFP36L1:F2       | GGTCAACTCCAGCCGCTACA         | HsZFP36L1:R2       | GGCACTTTTCCCCGACTTACA             | partial       | no               | NC              | Down            |
| CDCD75       | 213294_at           | 253635         | Coiled-coil domain containing 7f                                          | HsFLJ38348:F2      | GAAAAATGTTAATCTCTAGGGATAGACA | HsFLJ38348:R2      | GTCGCCCTTCTTACTGGGATA             | no match      | no               | Up              | Up              |
| PANK2        | 218809_at           | 80025          | pantothenate kinase 2 (Hallervorden-Spatz syndrome)                       | HsPANK2:F2         | GCACCTCTGAGCTGTTGAA          | HsPANK2:R2         | CACAGATCCCAATGTGGAAG              | no match      | no               | Up              | Up              |
| LY96         | 206584_at           | 23643          | lymphocyte antigen 9f                                                     | HsLY96:F2          | CATGTACCTTCTGTTTTTTTCCA      | HsLY96:R2          | CCCAATGCTCTGAGCTTCA               | no match      | no               | Up              | NC              |
| SERBP1       | 217724_at           | 26135          | SERPINE1 mRNA binding protein 1                                           | HsPAI-RBP1:F1      | CTTGTGCTCTGATGTGGATGAC       | HsPAI-RBP1:R1      | GGTTGTCTTATGGCATCCAGTAAAG         | no match      | no               | Up              | NC              |
| WDR23        | 201886_at           | 80344          | WD repeat domain 23                                                       | HsWDR23:F2         | CCTGACTTCTGATCCCACTCT        | HsWDR23:R2         | TGGAAAAGCGTCCGATATCC              | no match      | no               | NC              | Up              |
| NUP62        | 202153_s_at         | 23636          | nucleoporin 62kDa                                                         | HsNUP62:F2         | CTTGGGGTGGCACTGTTGAT         | HsNUP62:R2         | CCCATGGCAACTCAACATCT              | no match      | no               | NC              | Up              |
| TAP1         | 202307_s_at         | 6890           | transporter 1, ATP-binding cassette, sub-family B (MDR/TAP)               | HsTAP1:F2          | CACGTCCTCCAGGATGAG           | HsTAP1:R2          | GGAAGTGGCAATATTCAGAGGA            | no match      | no               | NC              | Up              |
| APOBEC3C     | 209584_x_at         | 27350          | apolipoprotein B mRNA editing enzyme, catalytic polypeptide-like 3f       | HsAPOBEC3C:F1      | TCTCTCTAGCTCCTGCTC           | HsAPOBEC3C:R1      | GATGACCAGGCAAAACAGA               | no match      | no               | NC              | Up              |
|              |                     |                | other primers used in the study                                           |                    |                              |                    |                                   |               |                  |                 |                 |
| TBP          | 6908                |                | TATA box binding protein                                                  | HsTBP:F2           | GGGCATTAATTTGGCACTGAGA       | HsTBP:R2           | TAGCAGCAGGTTATGACCACT             |               |                  | NC              | NC              |
| CCL2         | 6347                |                | chemokine (C-C motif) ligand 2                                            | HsCCL2:F3          | GGACCACCTGGACAAGCAAA         | HsCCL2:R3          | AGATTCTGGTGTGGGAGTGAT             |               |                  | NC              | NC              |
| CCL8         | 6355                |                | chemokine (C-C motif) ligand 8                                            | HsCCL8:F1          | GAGGAGCAGAGAGGTTGAGAACA      | HsCCL8:R1          | GGGTGTAGCTTCCAGCATG               |               |                  | NC              | NC              |
| CXCL9        | 4283                |                | chemokine (C-X-C motif) ligand 9                                          | HsCXCL9:F2         | CACAACAGCTGCTGGGAAGA         | HsCXCL9:R2         | AGATACTCTTGGAGGCTCAGTAC           |               |                  | NC              | NC              |
| CXCL10       | 3627                |                | chemokine (C-X-C motif) ligand 10                                         | HsCXCL10:F1        | TGACCTCACTAGCAGGAACCT        | HsCXCL10:R1        | CAGAANAATAGGCAGCAATACG            |               |                  | NC              | NC              |
| CXCL11       | 6373                |                | chemokine (C-X-C motif) ligand 11                                         | HsCXCL11:F2        | CAAAGAGTCCACAATTAATGGA       | HsCXCL11:R2        | CACCTTTGAACTCCGATGGTAACC          |               |                  | NC              | NC              |
| IL15RA       | 3601                |                |                                                                           |                    |                              |                    |                                   |               |                  |                 |                 |
