# Supplementary material
Source: PubMed Central journal article supplement (PMC1866039)
Supplement: jvirol_81_7_3477__2.pdf [file jvirol_81_7_3477__2.pdf]

Supplemental Table 2a. Genes upregulated in CD4+ cells from early and chronic HIV patients when compared to samples from uninfected and non-progressive donors

| Affymetrix Probe ID | Entrez Gene ID                                                      | Entrez Symbol               | Gene                                                                                                 | Fold Change | In CD8? |
|---------------------|---------------------------------------------------------------------|-----------------------------|------------------------------------------------------------------------------------------------------|-------------|---------|
| 206513_at           | 9447                                                                | AIM2                        | absent in melanoma 2                                                                                 | 1.78        | Yes     |
| 202124_s_at         | 66008                                                               | ALS2CR3                     | amyotrophic lateral sclerosis 2 (juvenile) chromosome region, candidate 3                            | 1.35        | No      |
| 202125_s_at         | 66008                                                               | ALS2CR3                     | amyotrophic lateral sclerosis 2 (juvenile) chromosome region, candidate 3                            | 1.31        | No      |
| 206133_at           | 54739                                                               | BIRC4BP                     | XIAP associated factor-1                                                                             | 2.58        | Yes     |
| 202095_s_at         | 332                                                                 | BIRC5                       | baculoviral IAP repeat-containing 5 (survivin)                                                       | 2.10        | Yes     |
| 201641_at           | 684                                                                 | BST2                        | bone marrow stromal cell antigen 2                                                                   | 1.47        | Yes     |
| 209642_at           | 699                                                                 | BUB1                        | BUB1 budding uninhibited by benzimidazoles 1 homolog (yeast)                                         | 2.78        | Yes     |
| 218542_at           | 55165                                                               | C10orf3                     | chromosome 10 open reading frame 3                                                                   | 2.34        | Yes     |
| 218741_at           | 79019                                                               | C22orf18                    | chromosome 22 open reading frame 18                                                                  | 2.15        | Yes     |
| 208925_at           | 56650                                                               | C3orf4                      | chromosome 3 open reading frame 4                                                                    | 1.84        | Yes     |
| 213322_at           | 221443                                                              | C6orf130                    | chromosome 6 open reading frame 130                                                                  | 1.39        | Yes     |
| 209970_x_at         | 834                                                                 | CASP1                       | caspase 1, apoptosis-related cysteine peptidase (interleukin 1, beta, convertase)                    | 1.53        | Yes     |
| 212097_at           | 857                                                                 | CAV1                        | caveolin 1, caveolae protein, 22kDa                                                                  | 1.94        | No      |
| 213294_at           | 253635                                                              | CCDC75                      | Coiled-coil domain containing 75                                                                     | 2.43        | Yes     |
| 213226_at           | 890                                                                 | CCNA2                       | Cyclin A2                                                                                            | 1.69        | Yes     |
| 206991_s_at         | 1234                                                                | CCR5                        | chemokine (C-C motif) receptor 5                                                                     | 2.35        | Yes     |
| 205692_s_at         | 952                                                                 | CD38                        | CD38 antigen (p45)                                                                                   | 2.74        | Yes     |
| 203213_at           | 983                                                                 | CDC2                        | Cell division cycle 2, G1 to S and G2 to M                                                           | 1.98        | Yes     |
| 218085_at           | 51510                                                               | CHMP5                       | chromatin modifying protein 5                                                                        | 1.79        | No      |
| 219356_s_at         | 51510                                                               | CHMP5                       | chromatin modifying protein 5                                                                        | 1.49        | No      |
| 218943_s_at         | 23586                                                               | DDX58                       | DEAD (Asp-Glu-Ala-Asp) box polypeptide 58                                                            | 1.59        | No      |
| 203764_at           | 9787                                                                | DLG7                        | discs, large homolog 7 (Drosophila)                                                                  | 1.96        | Yes     |
| 222154_s_at         | 26010                                                               | DNAPTTP6                    | DNA polymerase-transactivated protein 6                                                              | 3.57        | Yes     |
| 218585_s_at         | 51514                                                               | DTL                         | denticleless homolog (Drosophila)                                                                    | 1.67        | Yes     |
| 204858_s_at         | 1890                                                                | ECGF1                       | endothelial cell growth factor 1 (platelet-derived)                                                  | 1.86        | Yes     |
| 204211_x_at         | 5610                                                                | EIF2AK2                     | eukaryotic translation initiation factor 2-alpha kinase 2                                            | 2.17        | Yes     |
| 203358_s_at         | 2146                                                                | EZH2                        | enhancer of zeste homolog 2 (Drosophila)                                                             | 1.34        | Yes     |
| 202345_s_at         | 2171                                                                | FABP5                       | fatty acid binding protein 5 (psoriasis-associated)                                                  | 1.86        | Yes     |
| 218875_s_at         | 26271                                                               | FBXO5                       | F-box protein 5                                                                                      | 1.53        | Yes     |
| 213008_at           | 55215                                                               | FLJ10719                    | hypothetical protein FLJ10719                                                                        | 2.74        | Yes     |
| 218986_s_at         | 55601                                                               | FLJ20035                    | hypothetical protein FLJ20035                                                                        | 2.92        | Yes     |
| 220169_at           | 80008                                                               | FLJ23235                    | hypothetical protein FLJ23235                                                                        | 1.80        | Yes     |
| 219806_s_at         | 56935                                                               | FN5                         | FN5 protein                                                                                          | 1.99        | Yes     |
| 205483_s_at         | 9636                                                                | G1P2                        | interferon, alpha-inducible protein (clone IFI-15K)                                                  | 3.08        | Yes     |
| 204415_at           | 2537                                                                | G1P3                        | interferon, alpha-inducible protein (clone IFI-6-16)                                                 | 2.75        | Yes     |
| 202269_x_at         | 2633                                                                | GBP1                        | guanylate binding protein 1, interferon-inducible, 67kDa OR guanylate binding protein 1, interfere   | 1.57        | Yes     |
| 202270_at           | 2633                                                                | GBP1                        | guanylate binding protein 1, interferon-inducible, 67kDa OR guanylate binding protein 1, interfere   | 1.96        | Yes     |
| 219539_at           | 79833                                                               | GEMIN6                      | gem (nuclear organelle) associated protein 6                                                         | 2.92        | Yes     |
| 219243_at           | 55303                                                               | GIMAP4                      | GTPase, IMAP family member 4                                                                         | 1.95        | Yes     |
| 207651_at           | 29809                                                               | GPR171                      | G protein-coupled receptor 171                                                                       | 1.67        | Yes     |
| 218663_at           | 64151                                                               | HCAP-G                      | chromosome condensation protein G                                                                    | 4.40        | Yes     |
| 219863_at           | 51191                                                               | HERC5                       | hect domain and RLD 5                                                                                | 2.07        | Yes     |
| 219352_at           | 55008                                                               | HERC6                       | hect domain and RLD 6                                                                                | 2.84        | Yes     |
| 206332_s_at         | 3428                                                                | IFI16                       | interferon, gamma-inducible protein 16                                                               | 1.39        | Yes     |
| 208965_s_at         | 3428                                                                | IFI16                       | interferon, gamma-inducible protein 16                                                               | 1.61        | Yes     |
| 208966_x_at         | 3428                                                                | IFI16                       | interferon, gamma-inducible protein 16                                                               | 1.46        | Yes     |
| 202411_at           | 3429                                                                | IFI27                       | interferon, alpha-inducible protein 27                                                               | 9.71        | Yes     |
| 209417_s_at         | 3430                                                                | IFI35                       | interferon-induced protein 35                                                                        | 1.82        | Yes     |
| 214059_at           | 10561                                                               | IFI44                       | Interferon-induced protein 44                                                                        | 1.87        | Yes     |
| 214453_s_at         | 10561                                                               | IFI44                       | interferon-induced protein 44                                                                        | 5.42        | Yes     |
| 204439_at           | 10964                                                               | IFI44L                      | interferon-induced protein 44-like                                                                   | 17.96       | Yes     |
| 219209_at           | 64135                                                               | IFIH1                       | interferon induced with helicase C domain 1                                                          | 1.62        | Yes     |
| 203153_at           | 3434                                                                | IFIT1                       | interferon-induced protein with tetratricopeptide repeats 1 OR interferon-induced protein with te    | 5.66        | Yes     |
| 204747_at           | 3437                                                                | IFIT3                       | interferon-induced protein with tetratricopeptide repeats 3                                          | 2.96        | Yes     |
| 212203_x_at         | 10410                                                               | IFITM3                      | interferon induced transmembrane protein 3 (1-8U)                                                    | 1.49        | No      |
| 219684_at           | 64108                                                               | IFRG28                      | 28kD interferon responsive protein                                                                   | 2.02        | Yes     |
| 211430_s_at         | 3492 OR 3500 OR 3501 OR 3502 OR 3507 OR IGHG1 OR IGHG2 OR IGHG3 OR  | IGHG1 OR IGHG2 OR IGHG3 OR  | immunoglobulin heavy locus OR immunoglobulin heavy constant gamma 1 (G1m marker) OR                  | 5.42        | Yes     |
| 216510_x_at         | 3493 OR 3495 OR 3500 OR 3507 OR 39071-R IGHD OR IGHD1 OR IGHM OR LO | IGHD OR IGHD1 OR IGHM OR LO | immunoglobulin heavy constant alpha 1 OR immunoglobulin heavy constant delta OR immuno               | 5.47        | Yes     |
| 213674_x_at         | 3495                                                                | IGHD                        | immunoglobulin heavy constant delta                                                                  | 17.77       | Yes     |
| 212592_at           | 3512                                                                | IGJ                         | Immunoglobulin J polypeptide, linker protein for immunoglobulin alpha and mu polypeptides            | 4.27        | No      |
| 211645_x_at         | 3514                                                                | IGKC                        | Immunoglobulin kappa light chain (IGKV) mRNA variable region, joining region, and constant r         | 4.46        | Yes     |
| 214669_x_at         | 3514                                                                | IGKC                        | Immunoglobulin kappa variable 1-5                                                                    | 2.91        | Yes     |
| 215176_x_at         | 388978                                                              | IGKC                        | Immunoglobulin kappa light chain variable region (IGKV gene), clone 25                               | 7.34        | Yes     |
| 214836_x_at         | 28299 OR 3514                                                       | IGKC OR IGKV1-5             | immunoglobulin kappa constant OR immunoglobulin kappa variable 1-5                                   | 2.86        | Yes     |
| 221651_x_at         | 28299 OR 3514                                                       | IGKC OR IGKV1-5             | immunoglobulin kappa constant OR immunoglobulin kappa variable 1-5                                   | 6.06        | Yes     |
| 221671_x_at         | 28299 OR 3514                                                       | IGKC OR IGKV1-5             | immunoglobulin kappa constant OR immunoglobulin kappa variable 1-5                                   | 7.07        | Yes     |
| 216207_x_at         | 28902                                                               | IGKV1D-13                   | immunoglobulin kappa variable 1D-13                                                                  | 2.50        | Yes     |
| 214677_x_at         | 28793                                                               | IGL@                        | immunoglobulin lambda locus                                                                          | 5.40        | No      |
| 215121_x_at         | 28793                                                               | IGL@                        | immunoglobulin lambda locus                                                                          | 12.81       | No      |
| 215379_x_at         | 28793                                                               | IGL@                        | immunoglobulin lambda locus                                                                          | 3.97        | No      |
| 211798_x_at         | 28831                                                               | IGLJ3                       | immunoglobulin lambda joining 3                                                                      | 3.68        | Yes     |
| 217148_x_at         | 28815                                                               | IGLV2-14                    | immunoglobulin lambda variable 2-14                                                                  | 3.03        | No      |
| 209138_x_at         | 10901 OR 28793 OR 3538                                              | IGLV3-25 OR DHRS4 OR IGLC2  | Immunoglobulin lambda constant 1 (Mcg marker) OR Dehydrogenase/reductase (SDR family)                | 7.66        | Yes     |
| 215214_at           | 28793 OR 3538                                                       | IGLV3-25 OR IGLC2           | Immunoglobulin lambda constant 1 (Mcg marker) OR Immunoglobulin lambda joining 3                     | 4.65        | Yes     |
| 208436_s_at         | 3665                                                                | IRF7                        | interferon regulatory factor 7                                                                       | 1.93        | Yes     |
| 202503_s_at         | 9768                                                                | KIAA0101                    | KIAA0101                                                                                             | 2.97        | Yes     |
| 214712_at           | 440352                                                              | KIAA0220                    | Similar to BTG3 associated nuclear protein isoform b                                                 | 1.76        | No      |
| 204444_at           | 3832                                                                | KIF11                       | kinesin family member 11                                                                             | 2.41        | Yes     |
| 209408_at           | 11004                                                               | KIF2C                       | kinesin family member 2C                                                                             | 1.50        | Yes     |
| 218355_at           | 24137                                                               | KIF4A                       | kinesin family member 4A                                                                             | 1.73        | No      |
| 206785_s_at         | 3821 OR 3822                                                        | KLRC1 OR KLRC2              | killer cell lectin-like receptor subfamily C, member 1 OR killer cell lectin-like receptor subfamily | 2.22        | No      |
| 206486_at           | 3902                                                                | LAG3                        | lymphocyte-activation gene 3                                                                         | 1.80        | Yes     |
| 205569_at           | 27074                                                               | LAMP3                       | lysosomal-associated membrane protein 3                                                              | 4.86        | Yes     |
| 217933_s_at         | 51056                                                               | LAP3                        | leucine aminopeptidase 3                                                                             | 1.61        | Yes     |
| 203276_at           | 4001                                                                | LAMB1                       | lamin B1                                                                                             | 1.53        | Yes     |
| 215946_x_at         | 91353                                                               | LOC91353                    | similar to omega protein                                                                             | 2.16        | No      |
| 202145_at           | 4061                                                                | LY6E                        | lymphocyte antigen 6 complex, locus E                                                                | 2.08        | Yes     |
| 206584_at           | 23643                                                               | LY96                        | lymphocyte antigen 96                                                                                | 1.45        | No      |
| 200723_s_at         | 4076                                                                | M11S1                       | membrane component, chromosome 11, surface marker 1                                                  | 1.43        | No      |
| 204825_at           | 9833                                                                | MELK                        | maternal embryonic leucine zipper kinase                                                             | 2.10        | Yes     |
| 219812_at           | 79037                                                               | MGC2463                     | hypothetical protein MGC2463                                                                         | 1.46        | Yes     |
| 211637_x_at         | 192 OR 3500 OR 3507 OR 388025 OR 3880:C27165 OR IGH@ OR IGHG1 OR IG | IGH@ OR IGHG1 OR IG         | Immunoglobulin heavy chain variable region (VH IV family) from IgM rheumatoid factor OR Irm          | 2.75        | Yes     |
| 204173_at           | 140465                                                              | MLC1SA                      | myosin light chain 1 slow a                                                                          | 1.53        | Yes     |
| 208907_s_at         | 28973                                                               | MRPS18B                     | mitochondrial ribosomal protein S18B                                                                 | 1.37        | Yes     |
| 212859_x_at         | 4493                                                                | MT1E                        | metallothionein 1E (functional)                                                                      | 1.71        | Yes     |
| 217165_x_at         | 4494                                                                | MT1F                        | metallothionein 1F (functional)                                                                      | 1.54        | Yes     |
| 216336_x_at         | 4499                                                                | MT1M                        | Metallothionein 1M                                                                                   | 1.47        | Yes     |
| 208581_x_at         | 4501                                                                | MT1X                        | metallothionein 1X                                                                                   | 1.45        | No      |
| 201761_at           | 10797                                                               | MTHFD2                      | methylenetetrahydrofolate dehydrogenase (NADP+ dependent) 2, methylenetetrahydrofolate cy            | 1.46        | Yes     |
| 202086_at           | 4599                                                                | MX1                         | myxovirus (influenza virus) resistance 1, interferon-inducible protein p78 (mouse) OR myxoviru       | 4.64        | Yes     |
| 204994_at           | 4600                                                                | MX2                         | myxovirus (influenza virus) resistance 2 (mouse)                                                     | 1.84        | Yes     |
| 204641_at           | 4751                                                                | NEK2                        | NIMA (never in mitosis gene a)-related kinase 2                                                      | 1.76        | Yes     |
| 218039_at           | 51203                                                               | NUSAP1                      | nucleolar and spindle associated protein 1                                                           | 4.69        | Yes     |
| 202869_at           | 4938                                                                | OAS1                        | 2',5'-oligoadenylate synthetase 1, 40/46kDa                                                          | 3.86        | Yes     |
| 205552_s_at         | 4938                                                                | OAS1                        | 2',5'-oligoadenylate synthetase 1, 40/46kDa                                                          | 3.05        | Yes     |
| 204972_at           | 4939                                                                | OAS2                        | 2'-5'-oligoadenylate synthetase 2, 69/71kDa                                                          | 2.04        | Yes     |
| 218400_at           | 4940                                                                | OAS3                        | 2'-5'-oligoadenylate synthetase 3, 100kDa                                                            | 2.49        | Yes     |
| 210797_s_at         | 8638                                                                | OASL                        | 2'-5'-oligoadenylate synthetase-like                                                                 | 1.67        | Yes     |
| 218809_at           | 80025                                                               | PANK2                       | pantothenate kinase 2 (Hallervorden-Spatz syndrome)                                                  | 1.35        | Yes     |

|                            |       |         |                                                                                               |      |     |
|----------------------------|-------|---------|-----------------------------------------------------------------------------------------------|------|-----|
| 218543_s_at                | 64761 | PARP12  | poly (ADP-ribose) polymerase family, member 12                                                | 1.55 | Yes |
| 211023_at                  | 5162  | PDHB    | pyruvate dehydrogenase (lipoamide) beta                                                       | 1.42 | Yes |
| 220576_at                  | 80055 | PGAP1   | GPI deacylase                                                                                 | 1.90 | No  |
| 202430_s_at                | 5359  | PLSCR1  | phospholipid scramblase 1                                                                     | 3.00 | Yes |
| 202446_s_at                | 5359  | PLSCR1  | phospholipid scramblase 1                                                                     | 2.69 | Yes |
| 205267_at                  | 5450  | POU2AF1 | POU domain, class 2, associating factor 1                                                     | 2.23 | Yes |
| 208680_at                  | 5052  | PRDX1   | peroxiredoxin 1                                                                               | 1.47 | Yes |
| 201619_at                  | 10935 | PRDX3   | peroxiredoxin 3                                                                               | 1.61 | Yes |
| 201923_at                  | 10549 | PRDX4   | peroxiredoxin 4                                                                               | 1.39 | No  |
| 203396_at                  | 5685  | PSMA4   | proteasome (prosome, macropain) subunit, alpha type, 4                                        | 1.43 | Yes |
| 201274_at                  | 5686  | PSMA5   | proteasome (prosome, macropain) subunit, alpha type, 5                                        | 1.51 | Yes |
| 204279_at                  | 5698  | PSMB9   | proteasome (prosome, macropain) subunit, beta type, 9 (large multifunctional peptidase 2)     | 1.47 | Yes |
| 201762_s_at                | 5721  | PSME2   | proteasome (prosome, macropain) activator subunit 2 (PA28 beta)                               | 1.45 | Yes |
| 203554_x_at                | 9232  | PTTG1   | pituitary tumor-transforming 1                                                                | 1.55 | Yes |
| 203344_s_at                | 5932  | RBBP8   | retinoblastoma binding protein 8                                                              | 1.43 | Yes |
| 218117_at                  | 9978  | RBX1    | ring-box 1                                                                                    | 1.57 | Yes |
| 201890_at                  | 6241  | RRM2    | ribonucleotide reductase M2 polypeptide                                                       | 2.68 | Yes |
| 209773_s_at                | 6241  | RRM2    | ribonucleotide reductase M2 polypeptide                                                       | 2.83 | Yes |
| 213797_at                  | 91543 | RSAD2   | radical S-adenosyl methionine domain containing 2                                             | 3.34 | Yes |
| 205241_at                  | 9997  | SCO2    | SCO cytochrome oxidase deficient homolog 2 (yeast)                                            | 1.55 | Yes |
| 217724_at                  | 26135 | SERPBP1 | SERPINE 1 mRNA binding protein 1                                                              | 1.38 | No  |
| 220485_s_at                | 55423 | SIRPB2  | signal-regulatory protein beta 2                                                              | 1.35 | Yes |
| 204240_s_at                | 10592 | SMC2L1  | SMC2 structural maintenance of chromosomes 2-like 1 (yeast)                                   | 1.65 | Yes |
| 212577_at                  | 23347 | SMCHD1  | structural maintenance of chromosomes flexible hinge domain containing 1                      | 1.42 | No  |
| 208012_x_at                | 3431  | SP110   | SP110 nuclear body protein                                                                    | 1.40 | Yes |
| 208392_x_at                | 3431  | SP110   | SP110 nuclear body protein                                                                    | 1.48 | Yes |
| 209762_x_at                | 3431  | SP110   | SP110 nuclear body protein                                                                    | 1.41 | Yes |
| 201138_s_at                | 6741  | SSB     | Sjogren syndrome antigen B (autoantigen La)                                                   | 1.27 | No  |
| 200887_s_at                | 6772  | STAT1   | signal transducer and activator of transcription 1, 91kDa                                     | 1.52 | Yes |
| 209969_s_at                | 6772  | STAT1   | signal transducer and activator of transcription 1, 91kDa                                     | 2.09 | Yes |
| AFFX-HUMISGF3A/M97935_3_at | 6772  | STAT1   | signal transducer and activator of transcription 1, 91kDa                                     | 1.57 | Yes |
| AFFX-HUMISGF3A/M97935_5_at | 6772  | STAT1   | signal transducer and activator of transcription 1, 91kDa                                     | 1.70 | Yes |
| AFFX-HUMISGF3A/M97935_MA_ε | 6772  | STAT1   | signal transducer and activator of transcription 1, 91kDa                                     | 1.64 | Yes |
| AFFX-HUMISGF3A/M97935_MB_ε | 6772  | STAT1   | signal transducer and activator of transcription 1, 91kDa                                     | 1.45 | Yes |
| 32402_s_at                 | 8189  | SYMPK   | sympleskin                                                                                    | 1.52 | No  |
| 208716_s_at                | 54499 | TMCO1   | transmembrane and coiled-coil domains 1                                                       | 1.51 | Yes |
| 202687_s_at                | 8743  | TNFSF10 | tumor necrosis factor (ligand) superfamily, member 10 OR tumor necrosis factor (ligand) super | 1.64 | Yes |
| 202688_at                  | 8743  | TNFSF10 | tumor necrosis factor (ligand) superfamily, member 10 OR tumor necrosis factor (ligand) super | 1.72 | Yes |
| 214329_x_at                | 8743  | TNFSF10 | tumor necrosis factor (ligand) superfamily, member 10 OR tumor necrosis factor (ligand) super | 2.91 | Yes |
| 201291_s_at                | 7153  | TOP2A   | topoisomerase (DNA) II alpha 170kDa                                                           | 2.99 | Yes |
| 201292_at                  | 7153  | TOP2A   | topoisomerase (DNA) II alpha 170kDa                                                           | 3.89 | Yes |
| 213830_at                  | 6964  | TRD@    | T-cell receptor-delta mRNA, 3' end OR T cell receptor delta locus                             | 1.66 | No  |
| 213293_s_at                | 10346 | TRIM22  | tripartite motif-containing 22                                                                | 1.59 | No  |
| 203567_s_at                | 10475 | TRIM38  | tripartite motif-containing 38                                                                | 1.47 | Yes |
| 204822_at                  | 7272  | TTK     | TTK protein kinase                                                                            | 1.86 | Yes |
| 202589_at                  | 7298  | TYMS    | thymidylate synthetase                                                                        | 2.13 | Yes |
| 201649_at                  | 9246  | UBE2L6  | ubiquitin-conjugating enzyme E2L 6                                                            | 1.42 | Yes |
| 219211_at                  | 11274 | USP18   | ubiquitin specific peptidase 18                                                               | 5.07 | Yes |
| 203869_at                  | 64854 | USP46   | ubiquitin specific peptidase 46                                                               | 1.96 | No  |
| 218069_at                  | 79077 | XTP3TPA | XTP3-transactivated protein A                                                                 | 1.50 | Yes |
| 208087_s_at                | 81030 | ZBP1    | Z-DNA binding protein 1 OR Z-DNA binding protein 1                                            | 1.66 | Yes |
| 218349_s_at                | 55055 | ZWILCH  | Zwilch, kinetochore associated, homolog (Drosophila)                                          | 1.41 | Yes |
| 204026_s_at                | 11130 | ZWINT   | ZW10 interactor                                                                               | 1.63 | Yes |

Supplemental Table 2b. Genes upregulated in CD8+ cells from early and chronic HIV patients when compared to samples from uninfected and non-progressive donors

| Affymetrix Probe ID | Entrez Gene ID  | Entrez Symbol        | Gene                                                                              | Fold Change | In CD4? |
|---------------------|-----------------|----------------------|-----------------------------------------------------------------------------------|-------------|---------|
| 202170_s_at         | 60496           | AASDHPTP             | aminoadipate-semialdehyde dehydrogenase-phosphopantetheinyl transferase           | 1.30        | No      |
| 208002_s_at         | 11332           | ACOT7                | acyl-CoA thioesterase 7                                                           | 2.07        | No      |
| 202767_at           | 53              | ACP2                 | acid phosphatase 2, lysosomal                                                     | 1.47        | No      |
| 204638_at           | 54              | ACP5                 | acid phosphatase 5, tartrate resistant                                            | 1.59        | No      |
| 200721_s_at         | 10121           | ACTR1A               | ARP1 actin-related protein 1 homolog A, centractin alpha (yeast)                  | 1.57        | No      |
| 213102_at           | 10096           | ACTR3                | ARP3 actin-related protein 3 homolog (yeast)                                      | 1.47        | No      |
| 204639_at           | 100             | ADA                  | adenosine deaminase                                                               | 1.88        | No      |
| 216705_s_at         | 100             | ADA                  | adenosine deaminase                                                               | 1.89        | No      |
| 208847_s_at         | 128             | ADH5                 | alcohol dehydrogenase 5 (class III), chi polypeptide                              | 1.40        | No      |
| 206513_at           | 9447            | AIM2                 | absent in melanoma 2                                                              | 2.45        | Yes     |
| 202760_s_at         | 11217 OR 445815 | AKAP2 OR PALM2-AKAP2 | A kinase (PRKA) anchor protein 2 OR PALM2-AKAP2 protein                           | 2.57        | No      |
| 200782_at           | 308             | ANXA5                | annexin A5                                                                        | 1.66        | No      |
| 209635_at           | 1174            | AP1S1                | adaptor-related protein complex 1, sigma 1 subunit                                | 1.49        | No      |
| 206632_s_at         | 9582            | APOBEC3B             | apolipoprotein B mRNA editing enzyme, catalytic polypeptide-like 3B               | 2.37        | No      |
| 209584_x_at         | 27350           | APOBEC3C             | apolipoprotein B mRNA editing enzyme, catalytic polypeptide-like 3C               | 1.78        | No      |
| 204205_at           | 60489           | APOBEC3G             | apolipoprotein B mRNA editing enzyme, catalytic polypeptide-like 3G               | 1.57        | No      |
| 209546_s_at         | 8542            | APOL1                | apolipoprotein L 1                                                                | 1.81        | No      |
| 218527_at           | 54840           | APTX                 | apratxin                                                                          | 1.37        | No      |
| 218501_at           | 50650           | ARHGEF3              | Rho guanine nucleotide exchange factor (GEF) 3                                    | 1.40        | No      |
| 207988_s_at         | 10109           | ARPC2                | actin related protein 2/3 complex, subunit 2, 34kDa                               | 1.54        | No      |
| 213513_x_at         | 10109           | ARPC2                | actin related protein 2/3 complex, subunit 2, 34kDa                               | 1.31        | No      |
| 218115_at           | 55723           | ASF1B                | ASF1 anti-silencing function 1 homolog B (S. cerevisiae)                          | 2.23        | No      |
| 212041_at           | 9114            | ATP6V0D1             | ATPase, H+ transporting, lysosomal 38kDa, V0 subunit d isoform 1                  | 1.39        | No      |
| 208898_at           | 51382           | ATP6V1D              | ATPase, H+ transporting, lysosomal 34kDa, V1 subunit D                            | 2.01        | No      |
| 208899_x_at         | 51382           | ATP6V1D              | ATPase, H+ transporting, lysosomal 34kDa, V1 subunit D                            | 1.62        | No      |
| 205416_s_at         | 4287            | ATXN3                | ataxin 3                                                                          | 1.63        | No      |
| 209464_at           | 9212            | AURKB                | aurora kinase B                                                                   | 2.40        | No      |
| 210243_s_at         | 8703            | B4GALT3              | UDP-Gal:betaGlcNAc beta 1,4-galactosyltransferase, polypeptide 3                  | 1.35        | No      |
| 205345_at           | 580             | BARD1                | BRCA1 associated RING domain 1                                                    | 3.52        | No      |
| 205965_at           | 10538           | BATF                 | basic leucine zipper transcription factor, ATF-like                               | 1.64        | No      |
| 208445_s_at         | 9031            | BAZ1B                | bromodomain adjacent to zinc finger domain, 1B                                    | 1.57        | No      |
| 206133_at           | 54739           | BIRC4BP              | XIAP associated factor-1                                                          | 2.70        | Yes     |
| 202095_s_at         | 332             | BIRC5                | baculoviral IAP repeat-containing 5 (survivin)                                    | 8.36        | Yes     |
| 204531_s_at         | 672             | BRCA1                | breast cancer 1, early onset                                                      | 4.46        | No      |
| 201641_at           | 684             | BST2                 | bone marrow stromal cell antigen 2                                                | 1.64        | Yes     |
| 209642_at           | 699             | BUB1                 | BUB1 budding uninhibited by benzimidazoles 1 homolog (yeast)                      | 3.10        | Yes     |
| 203755_at           | 701             | BUB1B                | BUB1 budding uninhibited by benzimidazoles 1 homolog beta (yeast)                 | 2.42        | No      |
| 218542_at           | 55165           | C10orf3              | chromosome 10 open reading frame 3                                                | 5.57        | Yes     |
| 218597_s_at         | 55847           | C10orf70             | chromosome 10 open reading frame 70                                               | 1.76        | No      |
| 218852_at           | 55012           | C14orf10             | chromosome 14 open reading frame 10                                               | 1.34        | No      |
| 218298_s_at         | 80017           | C14orf159            | chromosome 14 open reading frame 159                                              | 1.49        | No      |
| 201683_x_at         | 9878            | C14orf92             | chromosome 14 open reading frame 92                                               | 1.46        | No      |
| 219283_at           | 29071           | C1GALT1C1            | C1GALT1-specific chaperone 1                                                      | 1.88        | No      |
| 215691_x_at         | 51668           | C1orf41              | chromosome 1 open reading frame 41                                                | 1.83        | No      |
| 218783_at           | 25896           | C1orf73              | chromosome 1 open reading frame 73                                                | 2.65        | No      |
| 209927_s_at         | 26097           | C1orf77              | chromosome 1 open reading frame 77                                                | 1.52        | No      |
| 219004_s_at         | 54069           | C21orf45             | chromosome 21 open reading frame 45                                               | 1.36        | No      |
| 218741_at           | 79019           | C22orf18             | chromosome 22 open reading frame 18                                               | 5.92        | Yes     |
| 219288_at           | 57415           | C3orf14              | chromosome 3 open reading frame 14                                                | 2.74        | No      |
| 208925_at           | 56650           | C3orf4               | chromosome 3 open reading frame 4                                                 | 1.93        | Yes     |
| 213322_at           | 221443          | C6orf130             | chromosome 6 open reading frame 130                                               | 1.53        | Yes     |
| 218195_at           | 79624           | C6orf211             | chromosome 6 open reading frame 211                                               | 1.70        | No      |
| 218979_at           | 80010           | C9orf76              | chromosome 9 open reading frame 76                                                | 1.59        | No      |
| 208374_s_at         | 829             | CAPZA1               | capping protein (actin filament) muscle Z-line, alpha 1                           | 1.54        | No      |
| 209970_x_at         | 834             | CASP1                | caspace 1, apoptosis-related cysteine peptidase (interleukin 1, beta, convertase) | 1.47        | Yes     |

|             |                        |                          |                                                                                                                  |       |     |
|-------------|------------------------|--------------------------|------------------------------------------------------------------------------------------------------------------|-------|-----|
| 211368_s_at | 834                    | CASP1                    | caspase 1, apoptosis-related cysteine peptidase (interleukin 1, beta, convertase)                                | 1.61  | Yes |
| 207181_s_at | 840                    | CASP7                    | caspase 7, apoptosis-related cysteine peptidase                                                                  | 1.55  | No  |
| 221912_s_at | 79140                  | CCDC28B                  | coiled-coil domain containing 28B                                                                                | 2.00  | No  |
| 213294_at   | 253635                 | CCDC75                   | Coiled-coil domain containing 75                                                                                 | 1.77  | Yes |
| 205114_s_at | 414062 OR 6348 OR 6349 | CCL3 OR CCL3L1 OR CCL3L3 | chemokine (C-C motif) ligand 3 OR chemokine (C-C motif) ligand 3-like 1 OR chemokine (C-C motif) ligand 3-like 2 | 2.65  | No  |
| 213226_at   | 890                    | CCNA2                    | Cyclin A2                                                                                                        | 2.85  | Yes |
| 202705_at   | 9133                   | CCNB2                    | cyclin B2                                                                                                        | 5.42  | No  |
| 213523_at   | 898                    | CCNE1                    | cyclin E1                                                                                                        | 1.47  | No  |
| 204826_at   | 899                    | CCNF                     | cyclin F                                                                                                         | 2.23  | No  |
| 205098_at   | 1230                   | CCR1                     | chemokine (C-C motif) receptor 1                                                                                 | 2.29  | No  |
| 205099_s_at | 1230                   | CCR1                     | chemokine (C-C motif) receptor 1                                                                                 | 4.07  | No  |
| 206978_at   | 1231                   | CCR2                     | chemokine (C-C motif) receptor 2 OR chemokine (C-C motif) receptor 2                                             | 1.46  | No  |
| 206991_s_at | 1234                   | CCR5                     | chemokine (C-C motif) receptor 5                                                                                 | 3.06  | Yes |
| 202256_at   | 10421                  | CD2BP2                   | CD2 antigen (cytoplasmic tail) binding protein 2                                                                 | 1.50  | No  |
| 202257_s_at | 10421                  | CD2BP2                   | CD2 antigen (cytoplasmic tail) binding protein 2                                                                 | 1.61  | No  |
| 205692_s_at | 952                    | CD38                     | CD38 antigen (p45)                                                                                               | 5.04  | Yes |
| 203213_at   | 983                    | CDCC2                    | Cell division cycle 2, G1 to S and G2 to M                                                                       | 4.39  | Yes |
| 203214_x_at | 983                    | CDCC2                    | cell division cycle 2, G1 to S and G2 to M                                                                       | 2.66  | Yes |
| 210559_s_at | 983                    | CDCC2                    | cell division cycle 2, G1 to S and G2 to M                                                                       | 4.25  | Yes |
| 202870_s_at | 991                    | CDC20                    | CDC20 cell division cycle 20 homolog (S. cerevisiae)                                                             | 4.66  | No  |
| 203968_s_at | 990                    | CDC6                     | CDC6 cell division cycle 6 homolog (S. cerevisiae)                                                               | 2.29  | No  |
| 209714_s_at | 1033                   | CDKN3                    | cyclin-dependent kinase inhibitor 3 (CDK2-associated dual specificity phosphatase)                               | 2.28  | No  |
| 209832_s_at | 81620                  | CDT1                     | DNA replication factor                                                                                           | 2.42  | No  |
| 204962_s_at | 1058                   | CENPA                    | centromere protein A, 17kDa                                                                                      | 3.25  | No  |
| 210821_x_at | 1058                   | CENPA                    | centromere protein A, 17kDa                                                                                      | 1.57  | No  |
| 207828_s_at | 1063                   | CENPF                    | centromere protein F, 350/400ka (mitosin)                                                                        | 3.86  | No  |
| 209172_s_at | 1063                   | CENPF                    | centromere protein F, 350/400ka (mitosin) OR centromere protein F, 350/400ka (mitosin)                           | 2.41  | No  |
| 219150_s_at | 11033                  | CENTA1                   | centaurin, alpha 1                                                                                               | 1.60  | No  |
| 205393_s_at | 1111                   | CHEK1                    | CHK1 checkpoint homolog (S. pombe)                                                                               | 2.35  | No  |
| 205394_at   | 1111                   | CHEK1                    | CHK1 checkpoint homolog (S. pombe)                                                                               | 3.09  | No  |
| 213060_s_at | 1117                   | CHI3L2                   | chitinase 3-like 2 OR chitinase 3-like 2                                                                         | 2.96  | No  |
| 202121_s_at | 27243                  | CHMP2A                   | chromatin modifying protein 2A                                                                                   | 1.51  | No  |
| 218927_s_at | 55501                  | CHST12                   | carbohydrate (chondroitin 4) sulfotransferase 12                                                                 | 1.83  | No  |
| 204170_s_at | 1164                   | CKS2                     | CDC28 protein kinase regulatory subunit 2                                                                        | 1.61  | No  |
| 219529_at   | 9022                   | CLIC3                    | chloride intracellular channel 3                                                                                 | 1.79  | No  |
| 216295_s_at | 1211                   | CLTA                     | clathrin, light polypeptide (Lca)                                                                                | 1.68  | No  |
| 208912_s_at | 1267                   | CNP                      | 2',3'-cyclic nucleotide 3' phosphodiesterase                                                                     | 1.73  | No  |
| 212189_s_at | 25839                  | COG4                     | component of oligomeric golgi complex 4                                                                          | 1.38  | No  |
| 218048_at   | 23412                  | COMM3                    | COMM domain containing 3                                                                                         | 1.59  | No  |
| 209132_s_at | 54939                  | COMM4                    | COMM domain containing 4                                                                                         | 1.49  | No  |
| 201098_at   | 9276                   | COPB2                    | coatamer protein complex, subunit beta 2 (beta prime)                                                            | 1.57  | No  |
| 221059_s_at | 23406                  | COTL1                    | coactosin-like 1 (Dictyostelium)                                                                                 | 1.67  | No  |
| 203663_s_at | 9377                   | COX5A                    | cytochrome c oxidase subunit Va                                                                                  | 1.48  | No  |
| 204172_at   | 1371                   | CPOX                     | coproporphyrinogen oxidase                                                                                       | 1.58  | No  |
| 218643_s_at | 9419                   | CRIP1                    | postsynaptic protein CRIP1                                                                                       | 1.50  | No  |
| 203947_at   | 1479                   | CSTF3                    | cleavage stimulation factor, 3' pre-RNA, subunit 3, 77kDa                                                        | 1.47  | No  |
| 202613_at   | 1503                   | CTPS                     | CTP synthase                                                                                                     | 1.61  | No  |
| 205898_at   | 1524                   | CX3CR1                   | chemokine (C-X3-C motif) receptor 1                                                                              | 2.66  | No  |
| 204923_at   | 54440                  | CXorf9                   | chromosome X open reading frame 9                                                                                | 1.83  | No  |
| 212133_at   | 23191                  | CYFIP1                   | Cytoplasmic FMR1 interacting protein 1                                                                           | 1.53  | No  |
| 203409_at   | 1643 OR 8022           | DDB2 OR LHX3             | damage-specific DNA binding protein 2, 48kDa OR LIM homeobox 3                                                   | 1.75  | No  |
| 202447_at   | 1666                   | DECR1                    | 2,4-dienoyl CoA reductase 1, mitochondrial                                                                       | 1.71  | No  |
| 221081_s_at | 79961                  | DENND2D                  | DENN/MADD domain containing 2D                                                                                   | 1.81  | No  |
| 220295_x_at | 55635                  | DEPDC1                   | DEP domain containing 1                                                                                          | 1.89  | No  |
| 200862_at   | 1718                   | DHCR24                   | 24-dehydrocholesterol reductase                                                                                  | 1.53  | No  |
| 219350_s_at | 56616                  | DIABLO                   | diablo homolog (Drosophila)                                                                                      | 1.31  | No  |
| 212333_at   | 25940                  | DKFZP564F0522            | DKFZP564F0522 protein                                                                                            | 1.43  | No  |
| 221265_s_at | 81556                  | DKFZP564O1664            | DKFZP564O1664 OR hypothetical protein DKFZP564O1664                                                              | 1.41  | No  |
| 215629_s_at | 79469 OR 8847          | DLEU2 OR BCMSUNL         | deleted in lymphocytic leukemia, 2 OR BCMS upstream neighbor-like                                                | 1.51  | No  |
| 216870_x_at | 79469 OR 8847          | DLEU2 OR BCMSUNL         | deleted in lymphocytic leukemia, 2 OR BCMS upstream neighbor-like                                                | 1.78  | No  |
| 203764_at   | 9787                   | DLG7                     | discs, large homolog 7 (Drosophila)                                                                              | 7.19  | Yes |
| 218435_at   | 29103                  | DNAJC15                  | DnaJ (Hsp40) homolog, subfamily C, member 15                                                                     | 1.43  | No  |
| 222154_s_at | 26010                  | DNAPT6                   | DNA polymerase-transactivated protein 6                                                                          | 3.71  | Yes |
| 200703_at   | 8655                   | DNCL1                    | dynein, cytoplasmic, light polypeptide 1                                                                         | 1.66  | No  |
| 216835_s_at | 1796                   | DOK1                     | docking protein 1, 62kDa (downstream of tyrosine kinase 1)                                                       | 1.45  | No  |
| 218567_x_at | 10072                  | DPP3                     | dipeptidylpeptidase 3                                                                                            | 1.68  | No  |
| 218585_s_at | 51514                  | DTL                      | denticleless homolog (Drosophila)                                                                                | 4.93  | Yes |
| 208956_x_at | 1854                   | DUT                      | dUTP pyrophosphatase                                                                                             | 1.46  | No  |
| 209932_s_at | 1854                   | DUT                      | dUTP pyrophosphatase                                                                                             | 1.71  | No  |
| 2028_s_at   | 1869                   | E2F1                     | E2F transcription factor 1                                                                                       | 1.53  | No  |
| 219990_at   | 79733                  | E2F8                     | E2F transcription factor 8                                                                                       | 3.22  | No  |
| 204858_s_at | 1890                   | ECGF1                    | endothelial cell growth factor 1 (platelet-derived)                                                              | 1.93  | Yes |
| 217497_at   | 1890                   | ECGF1                    | endothelial cell growth factor 1 (platelet-derived)                                                              | 2.48  | Yes |
| 219787_s_at | 1894                   | ECT2                     | epithelial cell transforming sequence 2 oncogene                                                                 | 2.45  | No  |
| 209572_s_at | 8726                   | EED                      | embryonic ectoderm development                                                                                   | 1.47  | No  |
| 204211_x_at | 5610                   | EIF2AK2                  | eukaryotic translation initiation factor 2-alpha kinase 2                                                        | 1.87  | Yes |
| 202461_at   | 8892                   | EIF2B2                   | eukaryotic translation initiation factor 2B, subunit 2 beta, 39kDa                                               | 1.60  | No  |
| 201144_s_at | 1965                   | EIF2S1                   | eukaryotic translation initiation factor 2, subunit 1 alpha, 35kDa                                               | 1.46  | No  |
| 208985_s_at | 8669                   | EIF3S1                   | eukaryotic translation initiation factor 3, subunit 1 alpha, 35kDa                                               | 1.53  | No  |
| 209393_s_at | 9470                   | EIF4E2                   | eukaryotic translation initiation factor 4E member 2                                                             | 1.53  | No  |
| 201767_s_at | 60528                  | ELAC2                    | elaC homolog 2 (E. coli)                                                                                         | 1.59  | No  |
| 219017_at   | 55500                  | ETNK1                    | ethanolamine kinase 1                                                                                            | 2.54  | No  |
| 203358_s_at | 2146                   | EZH2                     | enhancer of zeste homolog 2 (Drosophila)                                                                         | 2.56  | Yes |
| 202345_s_at | 2171                   | FABP5                    | fatty acid binding protein 5 (psoriasis-associated)                                                              | 2.23  | Yes |
| 209683_at   | 81553                  | FAM49A                   | Family with sequence similarity 49, member A                                                                     | 1.92  | No  |
| 205775_at   | 26240                  | FAM50B                   | family with sequence similarity 50, member B                                                                     | 1.56  | No  |
| 203564_at   | 2189                   | FANCG                    | Fanconi anemia, complementation group G                                                                          | 1.58  | No  |
| 218397_at   | 55120                  | FANCL                    | Fanconi anemia, complementation group L                                                                          | 1.94  | No  |
| 218875_s_at | 26271                  | FBXO5                    | F-box protein 5                                                                                                  | 2.22  | Yes |
| 207813_s_at | 2232                   | FDXR                     | ferredoxin reductase                                                                                             | 1.84  | No  |
| 204767_s_at | 2237                   | FEN1                     | flap structure-specific endonuclease 1                                                                           | 1.90  | No  |
| 204768_s_at | 2237                   | FEN1                     | flap structure-specific endonuclease 1                                                                           | 1.82  | No  |
| 202949_s_at | 2274                   | FHL2                     | four and a half LIM domains 2                                                                                    | 2.30  | No  |
| 213007_at   | 55215                  | FLJ10719                 | hypothetical protein FLJ10719                                                                                    | 2.44  | Yes |
| 213008_at   | 55215                  | FLJ10719                 | hypothetical protein FLJ10719                                                                                    | 13.49 | Yes |
| 219056_at   | 79621                  | FLJ11712                 | hypothetical protein FLJ11712                                                                                    | 1.33  | No  |
| 201818_at   | 79888                  | FLJ12443                 | hypothetical protein FLJ12443                                                                                    | 1.79  | No  |
| 218986_s_at | 55601                  | FLJ20035                 | hypothetical protein FLJ20035                                                                                    | 2.45  | Yes |
| 219696_at   | 54530                  | FLJ20054                 | hypothetical protein FLJ20054                                                                                    | 1.55  | No  |
| 219258_at   | 54962                  | FLJ20516                 | timeless-interacting protein                                                                                     | 1.53  | No  |
| 218646_at   | 54969                  | FLJ20534                 | hypothetical protein FLJ20534                                                                                    | 1.38  | No  |
| 220060_s_at | 55010                  | FLJ20641                 | hypothetical protein FLJ20641                                                                                    | 1.75  | No  |
| 217872_at   | 55011                  | FLJ20643                 | hypothetical protein FLJ20643                                                                                    | 1.33  | No  |
| 220169_at   | 80008                  | FLJ23235                 | hypothetical protein FLJ23235                                                                                    | 2.22  | Yes |
| 219806_s_at | 56935                  | FN5                      | FN5 protein                                                                                                      | 3.14  | Yes |
| 205483_s_at | 9636                   | G1P2                     | interferon, alpha-inducible protein (clone IFI-15K)                                                              | 3.52  | Yes |
| 204415_at   | 2537                   | G1P3                     | interferon, alpha-inducible protein (clone IFI-6-16)                                                             | 2.49  | Yes |
| 201503_at   | 10146                  | G3BP                     | Ras-GTPase-activating protein SH3-domain-binding protein                                                         | 1.48  | No  |
| 212378_at   | 2618                   | GART                     | phosphoribosylglycinamide formyltransferase, phosphoribosylglycinamide synthetase, phospho                       | 1.42  | No  |
| 212379_at   | 2618                   | GART                     | phosphoribosylglycinamide formyltransferase, phosphoribosylglycinamide synthetase, phospho                       | 1.68  | No  |
| 202269_x_at | 2633                   | GBP1                     | guanylate binding protein 1, interferon-inducible, 67kDa OR guanylate binding protein 1, interfe                 | 1.99  | Yes |
| 202270_at   | 2633                   | GBP1                     | guanylate binding protein 1, interferon-inducible, 67kDa OR guanylate binding protein 1, interfe                 | 2.50  | Yes |

|             |                                                                                 |                                                                                        |                                                                                                   |       |     |
|-------------|---------------------------------------------------------------------------------|----------------------------------------------------------------------------------------|---------------------------------------------------------------------------------------------------|-------|-----|
| 204224_s_at | 2643                                                                            | GCH1                                                                                   | GTP cyclohydrolase 1 (dopa-responsive dystonia)                                                   | 1.61  | No  |
| 219539_at   | 79833                                                                           | GEMIN6                                                                                 | gem (nuclear organelle) associated protein 6                                                      | 4.78  | Yes |
| 219243_at   | 55303                                                                           | GIMAP4                                                                                 | GTPase, IMAP family member 4                                                                      | 2.23  | Yes |
| 217814_at   | 57003                                                                           | GK001                                                                                  | GK001 protein                                                                                     | 1.62  | No  |
| 207153_s_at | 11146                                                                           | GLMN                                                                                   | glomulin, FKBP associated protein                                                                 | 2.05  | No  |
| 218350_s_at | 51053                                                                           | GMNN                                                                                   | geminin, DNA replication inhibitor                                                                | 2.16  | No  |
| 207651_at   | 29909                                                                           | GPR171                                                                                 | G protein-coupled receptor 171                                                                    | 2.00  | Yes |
| 209990_s_at | 9568                                                                            | GPR51                                                                                  | G protein-coupled receptor 51                                                                     | 1.76  | No  |
| 202451_at   | 2965                                                                            | GT2H1                                                                                  | general transcription factor IIH, polypeptide 1, 62kDa                                            | 1.85  | No  |
| 205488_at   | 3001                                                                            | GZMA                                                                                   | granzyme A (granzyme 1, cytotoxic T-lymphocyte-associated serine esterase 3) OR granzyme          | 1.66  | No  |
| 210164_at   | 3002                                                                            | GZMB                                                                                   | granzyme B (granzyme 2, cytotoxic T-lymphocyte-associated serine esterase 1) OR granzyme          | 1.96  | No  |
| 213911_s_at | 3015                                                                            | H2AFZ                                                                                  | H2A histone family, member Z                                                                      | 1.35  | No  |
| 218662_s_at | 64151                                                                           | HCAP-G                                                                                 | chromosome condensation protein G                                                                 | 2.29  | Yes |
| 218663_at   | 64151                                                                           | HCAP-G                                                                                 | chromosome condensation protein G                                                                 | 5.34  | Yes |
| 206082_at   | 10866                                                                           | HCP5                                                                                   | HLA complex P5                                                                                    | 1.53  | No  |
| 219863_at   | 51191                                                                           | HERC5                                                                                  | hect domain and RLD 5                                                                             | 2.33  | Yes |
| 219352_at   | 55008                                                                           | HERC6                                                                                  | hect domain and RLD 6                                                                             | 2.39  | Yes |
| 59999_at    | 55662                                                                           | HIF1AN                                                                                 | hypoxia-inducible factor 1, alpha subunit inhibitor                                               | 1.43  | No  |
| 217478_s_at | 3108                                                                            | HLA-DMA                                                                                | major histocompatibility complex, class II, DM alpha                                              | 1.50  | No  |
| 210982_s_at | 3122                                                                            | HLA-DRA                                                                                | major histocompatibility complex, class II, DR alpha                                              | 2.06  | No  |
| 208808_s_at | 3148                                                                            | HMG2                                                                                   | high-mobility group box 2                                                                         | 1.50  | No  |
| 203744_at   | 3149                                                                            | HMG3                                                                                   | high-mobility group box 3                                                                         | 1.91  | No  |
| 207165_at   | 3161                                                                            | HMMR                                                                                   | hyaluronan-mediated motility receptor (RHAMM)                                                     | 4.39  | No  |
| 209709_s_at | 3161                                                                            | HMMR                                                                                   | hyaluronan-mediated motility receptor (RHAMM)                                                     | 2.26  | No  |
| 204779_s_at | 3217                                                                            | HOBX7                                                                                  | homeo box B7                                                                                      | 1.98  | No  |
| 200942_s_at | 3281                                                                            | HSPB1                                                                                  | heat shock factor binding protein 1                                                               | 1.53  | No  |
| 220081_x_at | 51478                                                                           | HSD17B7                                                                                | hydroxysteroid (17-beta) dehydrogenase 7                                                          | 1.54  | No  |
| 200799_at   | 3303                                                                            | HSPA1A                                                                                 | heat shock 70kDa protein 1A                                                                       | 2.06  | No  |
| 200800_s_at | 3303 OR 3304                                                                    | HSPA1A OR HSPA1B                                                                       | heat shock 70kDa protein 1A OR heat shock 70kDa protein 1B                                        | 2.01  | No  |
| 218026_at   | 28958                                                                           | HSPC009                                                                                | HSPC009 protein                                                                                   | 1.74  | No  |
| 209448_at   | 10553                                                                           | HTATIP2                                                                                | HIV-1 Tat interactive protein 2, 30kDa                                                            | 1.54  | No  |
| 210046_s_at | 3418                                                                            | IDH2                                                                                   | isocitrate dehydrogenase 2 (NADP+), mitochondrial                                                 | 1.80  | No  |
| 206332_s_at | 3428                                                                            | IFI16                                                                                  | interferon, gamma-inducible protein 16                                                            | 1.75  | Yes |
| 208965_s_at | 3428                                                                            | IFI16                                                                                  | interferon, gamma-inducible protein 16                                                            | 2.19  | Yes |
| 208966_x_at | 3428                                                                            | IFI16                                                                                  | interferon, gamma-inducible protein 16                                                            | 1.89  | Yes |
| 202411_at   | 3429                                                                            | IFI27                                                                                  | interferon, alpha-inducible protein 27                                                            | 17.57 | Yes |
| 209417_s_at | 3430                                                                            | IFI35                                                                                  | interferon-induced protein 35                                                                     | 2.62  | Yes |
| 214059_at   | 10561                                                                           | IFI44                                                                                  | Interferon-induced protein 44                                                                     | 2.06  | Yes |
| 214453_s_at | 10561                                                                           | IFI44                                                                                  | interferon-induced protein 44                                                                     | 5.81  | Yes |
| 204439_at   | 10964                                                                           | IFI44L                                                                                 | interferon-induced protein 44-like                                                                | 30.90 | Yes |
| 219209_at   | 64135                                                                           | IFIH1                                                                                  | interferon induced with helicase C domain 1                                                       | 1.83  | Yes |
| 203153_at   | 3434                                                                            | IFIT1                                                                                  | interferon-induced protein with tetratricopeptide repeats 1 OR interferon-induced protein with te | 7.71  | Yes |
| 204747_at   | 3437                                                                            | IFIT3                                                                                  | interferon-induced protein with tetratricopeptide repeats 3                                       | 3.22  | Yes |
| 219684_at   | 64108                                                                           | IFR28                                                                                  | 28kD interferon responsive protein                                                                | 2.31  | Yes |
| 211430_s_at | 3492 OR 3500 OR 3501 OR 3502 OR 3507 OR IGHG1 OR IGHG2 OR IGHG3 OR              | immunoglobulin heavy locus OR immunoglobulin heavy constant gamma 1 (G1m marker) OR    | 5.01                                                                                              | Yes   |     |
| 216510_x_at | 3493 OR 3495 OR 3500 OR 3507 OR 39071-R IGHD OR IGHG1 OR IGHM OR LO             | immunoglobulin heavy constant alpha 1 OR immunoglobulin heavy constant delta OR immuno | 4.67                                                                                              | Yes   |     |
| 213674_x_at | 3495                                                                            | IGHD                                                                                   | immunoglobulin heavy constant delta                                                               | 19.82 | Yes |
| 214973_x_at | 3495                                                                            | IGHD                                                                                   | immunoglobulin heavy constant delta                                                               | 2.68  | Yes |
| 217236_x_at | 3500                                                                            | IGHG1                                                                                  | Immunoglobulin heavy constant gamma 1 (G1m marker)                                                | 2.44  | No  |
| 209374_s_at | 3507                                                                            | IGHM                                                                                   | immunoglobulin heavy constant mu                                                                  | 3.21  | No  |
| 211641_x_at | 3507 OR 388025                                                                  | IGHM                                                                                   | Isolate Middle91 immunoglobulin heavy chain variable region (IGVH) OR Isolate Middle91 imm        | 1.69  | No  |
| 211645_x_at | 3514                                                                            | IGKC                                                                                   | Immunoglobulin kappa light chain (IGKV) mRNA variable region, joining region, and constant r      | 3.24  | Yes |
| 214669_x_at | 3514                                                                            | IGKC                                                                                   | Immunoglobulin kappa variable 1-5                                                                 | 2.53  | Yes |
| 215176_x_at | 388978                                                                          | IGKC                                                                                   | Immunoglobulin kappa light chain variable region (IGKV gene), clone 25                            | 4.33  | Yes |
| 217157_x_at | 3514                                                                            | IGKC                                                                                   | IGK mRNA for immunoglobulin kappa light chain VLJ region, partial cds, clone:K142                 | 2.30  | Yes |
| 214836_x_at | 28299 OR 3514                                                                   | IGKC OR IGKV1-5                                                                        | immunoglobulin kappa constant OR immunoglobulin kappa variable 1-5                                | 2.41  | Yes |
| 221651_x_at | 28299 OR 3514                                                                   | IGKC OR IGKV1-5                                                                        | immunoglobulin kappa constant OR immunoglobulin kappa variable 1-5                                | 4.63  | Yes |
| 221671_x_at | 28299 OR 3514                                                                   | IGKC OR IGKV1-5                                                                        | immunoglobulin kappa constant OR immunoglobulin kappa variable 1-5                                | 4.61  | Yes |
| 216207_x_at | 28902                                                                           | IGKV1D-13                                                                              | immunoglobulin kappa variable 1D-13                                                               | 2.20  | Yes |
| 215121_x_at | 38793 OR 28815 OR 3535 OR 3537 OR 3538 OR IGLC1 OR IGLC2 OR IGLV3-25 OR IGLV    | immunoglobulin lambda locus OR immunoglobulin lambda constant 1 (Mcg marker) OR immu   | 4.76                                                                                              | No    |     |
| 214677_x_at | OR 28815 OR 28831 OR 3535 OR 3537 OR 3538 OR IGLC1 OR IGLC2 OR IGLV3-25 OR IGLV | immunoglobulin lambda locus OR immunoglobulin lambda constant 1 (Mcg marker) OR immu   | 5.98                                                                                              | No    |     |
| 215379_x_at | OR 28815 OR 28831 OR 3535 OR 3537 OR 3538 OR IGLC1 OR IGLC2 OR IGLV3-25 OR IGLV | immunoglobulin lambda locus OR immunoglobulin lambda constant 1 (Mcg marker) OR immu   | 3.36                                                                                              | No    |     |
| 211798_x_at | 28831                                                                           | IGLJ3                                                                                  | immunoglobulin lambda joining 3                                                                   | 2.91  | Yes |
| 211881_x_at | 28831                                                                           | IGLJ3                                                                                  | immunoglobulin lambda joining 3                                                                   | 2.03  | Yes |
| 217179_x_at | 28831                                                                           | IGLJ3                                                                                  | (clone 9F2L) Ig rearranged L-chain mRNA V-region, 5' end                                          | 2.68  | Yes |
| 209138_x_at | 10901 OR 28793 OR 3538                                                          | IGLV3-25 OR DHRS4 OR IGLC2                                                             | Immunoglobulin lambda constant 1 (Mcg marker) OR Dehydrogenase/reductase (SDR family)             | 5.44  | Yes |
| 215214_at   | 28793 OR 3538                                                                   | IGLV3-25 OR IGLC2                                                                      | Immunoglobulin lambda constant 1 (Mcg marker) OR Immunoglobulin lambda joining 3                  | 3.24  | Yes |
| 209929_s_at | 8517                                                                            | IKBK                                                                                   | inhibitor of kappa light polypeptide gene enhancer in B-cells, kinase gamma                       | 1.44  | No  |
| 201234_at   | 3611                                                                            | ILK                                                                                    | integrin-linked kinase                                                                            | 1.39  | No  |
| 208436_s_at | 3665                                                                            | IRF7                                                                                   | interferon regulatory factor 7                                                                    | 2.51  | Yes |
| 204698_at   | 3669                                                                            | ISG20                                                                                  | interferon stimulated exonuclease gene 20kDa                                                      | 1.45  | No  |
| 203882_at   | 10379                                                                           | ISGF3G                                                                                 | interferon-stimulated transcription factor 3, gamma 48kDa                                         | 1.36  | No  |
| 205841_at   | 3717                                                                            | JAK2                                                                                   | Janus kinase 2 (a protein tyrosine kinase)                                                        | 2.45  | No  |
| 205842_s_at | 3717                                                                            | JAK2                                                                                   | Janus kinase 2 (a protein tyrosine kinase)                                                        | 1.62  | No  |
| 203204_s_at | 9682                                                                            | JMJD2A                                                                                 | jumonji domain containing 2A                                                                      | 1.63  | No  |
| 202138_x_at | 7965                                                                            | JTV1                                                                                   | JTV1 gene                                                                                         | 1.46  | No  |
| 209971_x_at | 7965                                                                            | JTV1                                                                                   | JTV1 gene                                                                                         | 1.46  | No  |
| 212380_at   | 23070                                                                           | KIAA0082                                                                               | KIAA0082                                                                                          | 1.43  | No  |
| 202503_s_at | 9768                                                                            | KIAA0101                                                                               | KIAA0101                                                                                          | 6.11  | Yes |
| 211713_x_at | 9768                                                                            | KIAA0101                                                                               | KIAA0101 OR KIAA0101                                                                              | 2.35  | Yes |
| 200616_s_at | 9761                                                                            | KIAA0152                                                                               | KIAA0152                                                                                          | 1.57  | No  |
| 212405_s_at | 51603                                                                           | KIAA0859                                                                               | KIAA0859                                                                                          | 1.71  | No  |
| 204444_at   | 3832                                                                            | KIF11                                                                                  | kinesin family member 11                                                                          | 4.06  | Yes |
| 206364_at   | 9928                                                                            | KIF14                                                                                  | kinesin family member 14                                                                          | 2.58  | No  |
| 219306_at   | 56992                                                                           | KIF15                                                                                  | kinesin family member 15                                                                          | 3.18  | No  |
| 209408_at   | 11004                                                                           | KIF2C                                                                                  | kinesin family member 2C                                                                          | 2.40  | Yes |
| 204162_at   | 10403                                                                           | KNTC2                                                                                  | kinetochore associated 2                                                                          | 2.38  | No  |
| 214352_s_at | 3845                                                                            | KRAS                                                                                   | v-Ki-ras2 Kirsten rat sarcoma viral oncogene homolog                                              | 1.63  | No  |
| 206486_at   | 3902                                                                            | LAG3                                                                                   | lymphocyte-activation gene 3                                                                      | 2.38  | Yes |
| 205569_at   | 27074                                                                           | LAMP3                                                                                  | lysosomal-associated membrane protein 3                                                           | 3.27  | Yes |
| 217933_s_at | 51056                                                                           | LAP3                                                                                   | leucine aminopeptidase 3                                                                          | 1.76  | Yes |
| 213261_at   | 9881                                                                            | LBA1                                                                                   | lupus brain antigen 1                                                                             | 1.37  | No  |
| 203236_s_at | 3965                                                                            | LGALS9                                                                                 | lectin, galactoside-binding, soluble, 9 (galectin 9)                                              | 1.09  | No  |
| 203276_at   | 4001                                                                            | LMBN1                                                                                  | lamin B1                                                                                          | 3.19  | Yes |
| 222039_at   | 146909                                                                          | LOC146909                                                                              | hypothetical protein LOC146909                                                                    | 2.27  | No  |
| 217480_x_at | 339562                                                                          | LOC339562                                                                              | similar to Ig kappa chain                                                                         | 1.85  | No  |
| 202209_at   | 27258                                                                           | LSM3                                                                                   | LSM3 homolog, U6 small nuclear RNA associated (S. cerevisiae)                                     | 1.43  | No  |
| 219588_s_at | 54892                                                                           | LUZP5                                                                                  | leucine zipper protein 5                                                                          | 2.25  | No  |
| 218729_at   | 56925                                                                           | LXN                                                                                    | latexin                                                                                           | 2.30  | No  |
| 202145_at   | 4061                                                                            | LY6E                                                                                   | lymphocyte antigen 6 complex, locus E                                                             | 2.35  | Yes |
| 210943_s_at | 1130                                                                            | LYST                                                                                   | lysosomal trafficking regulator                                                                   | 1.39  | No  |
| 219003_s_at | 79694                                                                           | MANEA                                                                                  | mannosidase, endo-alpha                                                                           | 2.21  | No  |
| 203836_s_at | 4217                                                                            | MAP3K5                                                                                 | mitogen-activated protein kinase kinase kinase 5                                                  | 1.41  | No  |
| 203942_s_at | 2011                                                                            | MARK2                                                                                  | MAP/microtubule affinity-regulating kinase 2                                                      | 1.78  | No  |
| 202107_s_at | 4171                                                                            | MCM2                                                                                   | MCM2 minichromosome maintenance deficient 2, mitotin (S. cerevisiae)                              | 2.70  | No  |
| 212142_at   | 4173                                                                            | MCM4                                                                                   | MCM4 minichromosome maintenance deficient 4 (S. cerevisiae)                                       | 2.00  | No  |
| 222036_s_at | 4173                                                                            | MCM4                                                                                   | MCM4 minichromosome maintenance deficient 4 (S. cerevisiae)                                       | 2.40  | No  |
| 201755_at   | 4174                                                                            | MCM5                                                                                   | MCM5 minichromosome maintenance deficient 5, cell division cycle 46 (S. cerevisiae)               | 2.44  | No  |
| 216237_s_at | 4174                                                                            | MCM5                                                                                   | MCM5 minichromosome maintenance deficient 5, cell division cycle 46 (S. cerevisiae)               | 2.44  | No  |
| 201930_at   | 4175                                                                            | MCM6                                                                                   | MCM6 minichromosome maintenance deficient 6 (MIS5 homolog, S. pombe) (S. cerevisiae)              | 2.26  | No  |
| 218163_at   | 28985                                                                           | MCTS1                                                                                  | malignant T cell amplified sequence 1                                                             | 1.42  | No  |
| 213127_s_at | 112950                                                                          | MED8                                                                                   | mediator of RNA polymerase II transcription, subunit 8 homolog (yeast)                            | 1.44  | No  |

|             |                                                 |                     |                                                                                                |       |     |
|-------------|-------------------------------------------------|---------------------|------------------------------------------------------------------------------------------------|-------|-----|
| 204825_at   | 9833                                            | MELK                | maternal embryonic leucine zipper kinase                                                       | 3.48  | Yes |
| 219812_at   | 79037                                           | MGC2463             | hypothetical protein MGC2463                                                                   | 1.54  | Yes |
| 221637_s_at | 79081                                           | MGC2477             | hypothetical protein MGC2477                                                                   | 1.68  | No  |
| 211637_x_at | 192 OR 3500 OR 3507 OR 388025 OR 3880:C27165 OR | IGH@ OR IGHG1 OR IG | Immunoglobulin heavy chain variable region (VH IV family) from IgM rheumatoid factor OR Imr    | 3.62  | Yes |
| 218903_s_at | 79035                                           | MGC2731             | hypothetical protein MGC2731                                                                   | 1.52  | No  |
| 218130_at   | 79415                                           | MGC4368             | hypothetical protein MGC4368                                                                   | 1.55  | No  |
| 213851_at   | 375346                                          | MGC52022            | Similar to RIKEN cDNA 1810038N08 gene                                                          | 1.57  | No  |
| 206247_at   | 4277                                            | MICB                | MHC class I polypeptide-related sequence B                                                     | 1.72  | No  |
| 212020_s_at | 4288                                            | MKI67               | antigen identified by monoclonal antibody Ki-67                                                | 2.73  | No  |
| 204173_at   | 140465                                          | MLC1SA              | myosin light chain 1 slow a                                                                    | 2.38  | Yes |
| 218883_s_at | 79682                                           | MLF1IP              | MLF1 interacting protein                                                                       | 2.38  | No  |
| 220615_s_at | 55711                                           | MLSTD1              | male sterility domain containing 1                                                             | 2.90  | No  |
| 205395_s_at | 4361                                            | MRE11A              | MRE11 meiotic recombination 11 homolog A (S. cerevisiae)                                       | 1.82  | No  |
| 218027_at   | 29088                                           | MRPL15              | mitochondrial ribosomal protein L15                                                            | 1.49  | No  |
| 213897_s_at | 6150                                            | MRPL23              | mitochondrial ribosomal protein L23                                                            | 1.61  | No  |
| 204599_s_at | 10573                                           | MRPL28              | mitochondrial ribosomal protein L28                                                            | 1.43  | No  |
| 203800_s_at | 63931                                           | MRPS14              | mitochondrial ribosomal protein S14                                                            | 1.79  | No  |
| 208907_s_at | 28973                                           | MRS18B              | mitochondrial ribosomal protein S18B                                                           | 1.57  | Yes |
| 212859_x_at | 4493                                            | MT1E                | metallothionein 1E (functional)                                                                | 1.76  | Yes |
| 210524_x_at | 4494                                            | MT1F                | metallothionein 1F (functional)                                                                | 1.65  | Yes |
| 213629_x_at | 4494                                            | MT1F                | metallothionein 1F (functional)                                                                | 1.68  | Yes |
| 217165_x_at | 4494                                            | MT1F                | metallothionein 1F (functional)                                                                | 1.55  | Yes |
| 216336_x_at | 4499                                            | MT1M                | metallothionein 1M                                                                             | 1.61  | Yes |
| 202309_at   | 4522                                            | MTDFD1              | methylenetetrahydrofolate dehydrogenase (NADP+ dependent) 1, methylenetetrahydrofolate cy      | 1.84  | No  |
| 201761_at   | 10797                                           | MTDFD2              | methylenetetrahydrofolate dehydrogenase (NADP+ dependent) 2, methylenetetrahydrofolate cy      | 1.60  | Yes |
| 222132_s_at | 55750                                           | MULK                | multiple substrate lipid kinase                                                                | 1.63  | No  |
| 202086_at   | 4599                                            | MX1                 | myxovirus (influenza virus) resistance 1, interferon-inducible protein p78 (mouse) OR myxoviru | 5.45  | Yes |
| 204994_at   | 4600                                            | MX2                 | myxovirus (influenza virus) resistance 2 (mouse)                                               | 1.97  | Yes |
| 213733_at   | 4542                                            | MYO1F               | myosin IF                                                                                      | 1.78  | No  |
| 201969_at   | 4678                                            | NASP                | nuclear autoantigenic sperm protein (histone-binding)                                          | 1.42  | No  |
| 214440_at   | 9                                               | NAT1                | N-acetyltransferase 1 (arylamine N-acetyltransferase)                                          | 1.62  | No  |
| 209520_s_at | 4686                                            | NCBP1               | nuclear cap binding protein subunit 1, 80kDa                                                   | 1.69  | No  |
| 209734_at   | 3071                                            | NCKAP1L             | NCK-associated protein 1-like                                                                  | 1.64  | No  |
| 204125_at   | 51103                                           | NDUFAF1             | NADH dehydrogenase (ubiquinone) 1 alpha subcomplex, assembly factor 1                          | 1.77  | No  |
| 203371_s_at | 4709                                            | NDUFB3              | NADH dehydrogenase (ubiquinone) 1 beta subcomplex, 3, 12kDa                                    | 1.48  | No  |
| 201966_at   | 4720                                            | NDUFS2              | NADH dehydrogenase (ubiquinone) Fe-S protein 2, 49kDa (NADH-coenzyme Q reductase)              | 1.46  | No  |
| 33767_at    | 4744                                            | NEFH                | neurofilament, heavy polypeptide 200kDa                                                        | 1.73  | No  |
| 204641_at   | 4751                                            | NEK2                | NIMA (never in mitosis gene a)-related kinase 2                                                | 8.98  | Yes |
| 203830_at   | 64149                                           | NJMU-R1             | protein kinase Njmu-R1                                                                         | 1.78  | No  |
| 203964_at   | 9111                                            | NMI                 | N-myc (and STAT) interactor                                                                    | 1.62  | No  |
| 217962_at   | 55505                                           | NOLA3               | nucleolar protein family A, member 3 (H/ACA small nucleolar RNPs)                              | 1.43  | No  |
| 215093_at   | 50814                                           | NSDHL               | NAD(P) dependent steroid dehydrogenase-like                                                    | 1.37  | No  |
| 209731_at   | 4913                                            | NTHL1               | nth endonuclease III-like 1 (E. coli)                                                          | 1.52  | No  |
| 204766_s_at | 4521                                            | NUDT1               | nudix (nucleoside diphosphate linked moiety X)-type motif 1                                    | 2.26  | No  |
| 219665_at   | 79873                                           | NUDT18              | nudix (nucleoside diphosphate linked moiety X)-type motif 18                                   | 1.47  | No  |
| 218622_at   | 79023                                           | NUP37               | nucleoporin 37kDa                                                                              | 1.52  | No  |
| 202153_s_at | 23636                                           | NUP62               | nucleoporin 62kDa                                                                              | 1.58  | No  |
| 218039_at   | 51203                                           | NUSAP1              | nucleolar and spindle associated protein 1                                                     | 3.86  | Yes |
| 219978_s_at | 51203                                           | NUSAP1              | nucleolar and spindle associated protein 1                                                     | 4.90  | Yes |
| 202869_at   | 4938                                            | OAS1                | 2',5'-oligoadenylate synthetase 1, 40/46kDa                                                    | 5.27  | Yes |
| 205552_s_at | 4938                                            | OAS1                | 2',5'-oligoadenylate synthetase 1, 40/46kDa                                                    | 4.60  | Yes |
| 204972_at   | 4939                                            | OAS2                | 2'-5'-oligoadenylate synthetase 2, 69/71kDa                                                    | 3.03  | Yes |
| 218400_at   | 4940                                            | OAS3                | 2'-5'-oligoadenylate synthetase 3, 100kDa                                                      | 2.16  | Yes |
| 205660_at   | 8638                                            | OASL                | 2'-5'-oligoadenylate synthetase-like                                                           | 2.27  | Yes |
| 210797_s_at | 8638                                            | OASL                | 2'-5'-oligoadenylate synthetase-like                                                           | 2.05  | Yes |
| 213599_at   | 11339                                           | OIP5                | Opa interacting protein 5                                                                      | 2.14  | No  |
| 202759_s_at | 445815                                          | PALM2-AKAP2         | PALM2-AKAP2 protein                                                                            | 1.68  | No  |
| 218809_at   | 80025                                           | PANK2               | pantothenate kinase 2 (Hallervorden-Spatz syndrome)                                            | 1.49  | Yes |
| 203905_at   | 5073                                            | PARN                | poly(A)-specific ribonuclease (deadenylation nuclease)                                         | 1.30  | No  |
| 218543_s_at | 64761                                           | PARP12              | poly (ADP-ribose) polymerase family, member 12                                                 | 1.76  | Yes |
| 219148_at   | 55872                                           | PBK                 | PDZ binding kinase                                                                             | 3.19  | No  |
| 201933_at   | 5119                                            | PCOLN3              | procollagen (type III) N-endopeptidase                                                         | 1.47  | No  |
| 211023_at   | 5162                                            | PDHB                | pyruvate dehydrogenase (lipoamide) beta                                                        | 1.54  | Yes |
| 221521_s_at | 51659                                           | Pfs2                | DNA replication complex GINS protein PSF2                                                      | 27.97 | No  |
| 215134_at   | 55361                                           | PI4KII              | phosphatidylinositol 4-kinase type II                                                          | 1.46  | No  |
| 205078_at   | 5281                                            | PIGF                | phosphatidylinositol glycan, class F                                                           | 1.62  | No  |
| 204613_at   | 5336                                            | PLCG2               | phospholipase C, gamma 2 (phosphatidylinositol-specific)                                       | 2.61  | No  |
| 202430_s_at | 5359                                            | PLSCR1              | phospholipid scramblase 1                                                                      | 3.35  | Yes |
| 202446_s_at | 5359                                            | PLSCR1              | phospholipid scramblase 1                                                                      | 3.09  | Yes |
| 213241_at   | 10154                                           | PLXNC1              | plexin C1                                                                                      | 1.53  | No  |
| 204285_s_at | 5366                                            | PMAIP1              | phorbol-12-myristate-13-acetate-induced protein 1                                              | 1.48  | No  |
| 204441_s_at | 23649                                           | POLA2               | polymerase (DNA directed), alpha 2 (70kD subunit)                                              | 1.92  | No  |
| 205909_at   | 5427                                            | POLE2               | polymerase (DNA directed), epsilon 2 (p59 subunit)                                             | 2.31  | No  |
| 202868_s_at | 10775                                           | POPA                | processing of precursor 4, ribonuclease P/MRP subunit (S. cerevisiae)                          | 1.45  | No  |
| 205267_at   | 5450                                            | POU2AF1             | POU domain, class 2, associating factor 1                                                      | 2.13  | Yes |
| 201602_s_at | 4659                                            | PPP1R12A            | protein phosphatase 1, regulatory (inhibitor) subunit 12A                                      | 1.54  | No  |
| 213305_s_at | 5527                                            | PPP2R5C             | protein phosphatase 2, regulatory subunit B (B56), gamma isoform                               | 1.47  | No  |
| 208932_at   | 5531                                            | PPP4C               | protein phosphatase 4 (formerly X), catalytic subunit                                          | 1.48  | No  |
| 208680_at   | 5052                                            | PRDX1               | peroxiredoxin 1                                                                                | 1.50  | Yes |
| 201619_at   | 10935                                           | PRDX3               | peroxiredoxin 3                                                                                | 2.74  | Yes |
| 204117_at   | 5550                                            | PREP                | prolyl endopeptidase                                                                           | 1.38  | No  |
| 37950_at    | 5550                                            | PREP                | prolyl endopeptidase                                                                           | 1.34  | No  |
| 214617_at   | 5551                                            | PRF1                | perforin 1 (pore forming protein) OR perforin 1 (pore forming protein)                         | 1.72  | No  |
| 206102_at   | 9837                                            | PSF1                | DNA replication complex GINS protein PSF1                                                      | 3.38  | No  |
| 203396_at   | 5685                                            | PSMA4               | proteasome (prosome, macropain) subunit, alpha type, 4                                         | 1.90  | Yes |
| 201274_at   | 5686                                            | PSMA5               | proteasome (prosome, macropain) subunit, alpha type, 5                                         | 1.98  | Yes |
| 208805_at   | 5687                                            | PSMA6               | proteasome (prosome, macropain) subunit, alpha type, 6                                         | 1.60  | No  |
| 202659_at   | 5699                                            | PSMB10              | proteasome (prosome, macropain) subunit, beta type, 10                                         | 1.79  | No  |
| 200039_s_at | 5690                                            | PSMB2               | proteasome (prosome, macropain) subunit, beta type, 2 OR proteasome (prosome, macropain        | 1.96  | No  |
| 209040_s_at | 5696                                            | PSMB8               | proteasome (prosome, macropain) subunit, beta type, 8 (large multifunctional peptidase 7)      | 1.62  | No  |
| 204279_at   | 5698                                            | PSMB9               | proteasome (prosome, macropain) subunit, beta type, 9 (large multifunctional peptidase 2)      | 1.59  | Yes |
| 201252_at   | 5704                                            | PSMC4               | proteasome (prosome, macropain) 26S subunit, ATPase, 4                                         | 1.46  | No  |
| 201762_s_at | 5721                                            | PSME2               | proteasome (prosome, macropain) activator subunit 2 (PA28 beta)                                | 1.86  | Yes |
| 201896_s_at | 84722                                           | PSRC1               | proline/serine-rich coiled-coil 1                                                              | 1.40  | No  |
| 204852_s_at | 5778                                            | PTPN7               | protein tyrosine phosphatase, non-receptor type 7                                              | 1.53  | No  |
| 203554_x_at | 9232                                            | PTTG1               | pituitary tumor-transforming 1                                                                 | 2.03  | Yes |
| 218135_at   | 51290                                           | PTX1                | PTX1 protein                                                                                   | 1.41  | No  |
| 201606_s_at | 11137                                           | PWP1                | PWP1 homolog (S. cerevisiae)                                                                   | 1.48  | No  |
| 221666_s_at | 29108                                           | PYCARD              | PYD and CARD domain containing                                                                 | 1.74  | No  |
| 218700_s_at | 8934                                            | RAB7L1              | RAB7, member RAS oncogene family-like 1                                                        | 1.41  | No  |
| 222077_s_at | 29127                                           | RACGAP1             | Rac GTPase activating protein 1                                                                | 2.22  | No  |
| 204146_at   | 10635                                           | RAD51AP1            | RAD51 associated protein 1                                                                     | 3.41  | No  |
| 202844_s_at | 10928                                           | RALBP1              | ra1A binding protein 1                                                                         | 1.42  | No  |
| 209444_at   | 5910                                            | RAP1GDS1            | RAP1, GTP-GDP dissociation stimulator 1                                                        | 1.36  | No  |
| 204070_at   | 5920                                            | RARRS3              | retinoic acid receptor responder (tazarotene induced) 3                                        | 1.41  | No  |
| 203344_s_at | 5932                                            | RBBP8               | retinoblastoma binding protein 8                                                               | 2.55  | Yes |
| 218117_at   | 9978                                            | RBX1                | ring-box 1                                                                                     | 1.63  | Yes |
| 218599_at   | 9985                                            | REC8L1              | REC8-like 1 (yeast)                                                                            | 1.46  | No  |
| 212917_x_at | 5965                                            | RECQL               | RecQ protein-like (DNA helicase Q1-like)                                                       | 1.46  | No  |
| 202297_s_at | 11079                                           | RER1                | RER1 retention in endoplasmic reticulum 1 homolog (S. cerevisiae)                              | 1.27  | No  |
| 204127_at   | 5983                                            | RFC3                | replication factor C (activator 1) 3, 38kDa                                                    | 1.68  | No  |
| 202758_s_at | 8625                                            | RFXANK              | regulatory factor X-associated ankyrin-containing protein                                      | 1.33  | No  |

|                             |        |          |                                                                                                   |      |     |
|-----------------------------|--------|----------|---------------------------------------------------------------------------------------------------|------|-----|
| 203823_at                   | 5998   | RGS3     | regulator of G-protein signalling 3                                                               | 1.45 | No  |
| 203022_at                   | 10535  | RNASEH2A | ribonuclease H2, large subunit                                                                    | 1.53 | No  |
| 219035_s_at                 | 80196  | RNF34    | ring finger protein 34                                                                            | 1.43 | No  |
| 203160_s_at                 | 9025   | RNF8     | ring finger protein 8                                                                             | 1.33 | No  |
| 209507_at                   | 6119   | RPA3     | replication protein A3, 14kDa                                                                     | 1.76 | No  |
| 201890_at                   | 6241   | RRM2     | ribonucleotide reductase M2 polypeptide                                                           | 7.68 | Yes |
| 209773_s_at                 | 6241   | RRM2     | ribonucleotide reductase M2 polypeptide                                                           | 7.99 | Yes |
| 213797_at                   | 91543  | RSAD2    | radical S-adenosyl methionine domain containing 2                                                 | 4.21 | Yes |
| 200660_at                   | 6282   | S100A11  | S100 calcium binding protein A11 (calgizzarin)                                                    | 1.50 | No  |
| 219691_at                   | 54809  | SAMD9    | sterile alpha motif domain containing 9                                                           | 1.96 | No  |
| 205241_at                   | 9997   | SCO2     | SCO cytochrome oxidase deficient homolog 2 (yeast)                                                | 1.93 | Yes |
| 207707_s_at                 | 6396   | SEC13L1  | SEC13-like 1 (S. cerevisiae)                                                                      | 1.33 | No  |
| 216392_s_at                 | 11196  | SEC23IP  | SEC23 interacting protein                                                                         | 1.95 | No  |
| 210116_at                   | 4068   | SH2D1A   | SH2 domain protein 1A, Duncan's disease (lymphoproliferative syndrome)                            | 1.56 | No  |
| 207351_s_at                 | 9047   | SH2D2A   | SH2 domain protein 2A                                                                             | 1.74 | No  |
| 219493_at                   | 79801  | SHCBP1   | SHC SH2-domain binding protein 1                                                                  | 4.02 | No  |
| 202276_at                   | 7979   | SHFM1    | split hand/foot malformation (ectrodactyly) type 1                                                | 1.88 | No  |
| 220485_s_at                 | 55423  | SIRPB2   | signal-regulatory protein beta 2                                                                  | 1.47 | Yes |
| 219159_s_at                 | 57823  | SLAMF7   | SLAM family member 7                                                                              | 1.75 | No  |
| 209610_s_at                 | 6509   | SLC1A4   | solute carrier family 1 (glutamate/neutral amino acid transporter), member 4                      | 1.99 | No  |
| 212811_x_at                 | 6509   | SLC1A4   | solute carrier family 1 (glutamate/neutral amino acid transporter), member 4                      | 1.79 | No  |
| 209003_at                   | 8402   | SLC25A11 | solute carrier family 25 (mitochondrial carrier; oxoglutarate carrier), member 11                 | 1.35 | No  |
| 203658_at                   | 788    | SLC25A20 | solute carrier family 25 (carnitine/acylcarnitine translocase), member 20                         | 1.66 | No  |
| 205768_s_at                 | 11001  | SLC27A2  | solute carrier family 27 (fatty acid transporter), member 2                                       | 2.93 | No  |
| 205769_at                   | 11001  | SLC27A2  | solute carrier family 27 (fatty acid transporter), member 2                                       | 2.53 | No  |
| 218519_at                   | 55032  | SLC35A5  | solute carrier family 35, member A5                                                               | 1.58 | No  |
| 201827_at                   | 6603   | SMARCD2  | SWI/SNF related, matrix associated, actin dependent regulator of chromatin, subfamily d, member 2 | 1.63 | No  |
| 204240_s_at                 | 10592  | SMC2L1   | SMC2 structural maintenance of chromosomes 2-like 1 (yeast)                                       | 2.32 | Yes |
| 213253_at                   | 10592  | SMC2L1   | SMC2 structural maintenance of chromosomes 2-like 1 (yeast)                                       | 1.73 | Yes |
| 201663_s_at                 | 10051  | SMC4L1   | SMC4 structural maintenance of chromosomes 4-like 1 (yeast)                                       | 2.02 | No  |
| 201664_at                   | 10051  | SMC4L1   | SMC4 structural maintenance of chromosomes 4-like 1 (yeast)                                       | 2.00 | No  |
| 218327_s_at                 | 9342   | SNAP29   | synaptosomal-associated protein, 29kDa                                                            | 1.53 | No  |
| 220140_s_at                 | 29916  | SNX11    | sorting nexin 11                                                                                  | 1.65 | No  |
| 201563_at                   | 6652   | SORD     | sorbitol dehydrogenase                                                                            | 1.46 | No  |
| 202863_at                   | 6672   | SP100    | nuclear antigen Sp100                                                                             | 1.47 | No  |
| 210218_s_at                 | 6672   | SP100    | nuclear antigen Sp100                                                                             | 1.65 | No  |
| 208012_x_at                 | 3431   | SP110    | SP110 nuclear body protein                                                                        | 1.47 | Yes |
| 209762_x_at                 | 3431   | SP110    | SP110 nuclear body protein                                                                        | 1.43 | Yes |
| 207777_s_at                 | 11262  | SP140    | SP140 nuclear body protein                                                                        | 1.45 | No  |
| 209891_at                   | 57405  | SPBC25   | spindle pole body component 25 homolog (S. cerevisiae)                                            | 2.49 | No  |
| 217995_at                   | 58472  | SQRDL    | sulfide quinone reductase-like (yeast)                                                            | 1.46 | No  |
| 203605_at                   | 6729   | SRP54    | signal recognition particle 54kDa                                                                 | 1.64 | No  |
| 200028_s_at                 | 56910  | STARD7   | START domain containing 7 OR START domain containing 7                                            | 1.38 | No  |
| 200887_s_at                 | 6772   | STAT1    | signal transducer and activator of transcription 1, 91kDa                                         | 1.52 | Yes |
| 209969_s_at                 | 6772   | STAT1    | signal transducer and activator of transcription 1, 91kDa                                         | 3.07 | Yes |
| AFFX-HUMISGF3A/M97935_5_at  | 6772   | STAT1    | signal transducer and activator of transcription 1, 91kDa                                         | 1.92 | Yes |
| \AFFX-HUMISGF3A/M97935_MA_ε | 6772   | STAT1    | signal transducer and activator of transcription 1, 91kDa                                         | 1.82 | Yes |
| 202951_at                   | 11329  | STK38    | serine/threonine kinase 38                                                                        | 1.51 | No  |
| 208079_s_at                 | 6790   | STK6     | serine/threonine kinase 6                                                                         | 4.92 | No  |
| 200783_s_at                 | 3925   | STMN1    | stathmin 1/oncoprotein 18                                                                         | 1.75 | No  |
| 217874_at                   | 8802   | SUCLG1   | succinate-CoA ligase, GDP-forming, alpha subunit                                                  | 1.45 | No  |
| 202307_s_at                 | 6890   | TAP1     | transporter 1, ATP-binding cassette, sub-family B (MDR/TAP)                                       | 2.30 | No  |
| 201263_at                   | 6897   | TARS     | threonyl-tRNA synthetase                                                                          | 1.45 | No  |
| 212685_s_at                 | 26608  | TBL2     | transducin (beta)-like 2                                                                          | 1.52 | No  |
| 213951_s_at                 | 29893  | TBPIP    | TBP-1 interacting protein                                                                         | 1.62 | No  |
| 212330_at                   | 7027   | TFDP1    | transcription factor Dp-1                                                                         | 1.67 | No  |
| 218357_s_at                 | 26521  | TIMM8B   | translocase of inner mitochondrial membrane 8 homolog B (yeast)                                   | 1.55 | No  |
| 214773_x_at                 | 261726 | TIPRL    | TIP41, TOR signalling pathway regulator-like (S. cerevisiae)                                      | 1.61 | No  |
| 208716_s_at                 | 54499  | TMCO1    | transmembrane and coiled-coil domains 1                                                           | 1.60 | Yes |
| 211098_x_at                 | 54499  | TMCO1    | transmembrane and coiled-coil domains 1                                                           | 1.55 | Yes |
| 220177_s_at                 | 64699  | TMPRSS3  | transmembrane protease, serine 3                                                                  | 1.46 | No  |
| 214657_s_at                 | 283131 | TncRNA   | Full-length cDNA clone CSOD1085YB07 of Placenta Cot 25-normalized of Homo sapiens (hum:)          | 1.56 | No  |
| 202687_s_at                 | 8743   | TNFSF10  | tumor necrosis factor (ligand) superfamily, member 10 OR tumor necrosis factor (ligand) super     | 1.98 | Yes |
| 202688_at                   | 8743   | TNFSF10  | tumor necrosis factor (ligand) superfamily, member 10 OR tumor necrosis factor (ligand) super     | 1.99 | Yes |
| 214329_x_at                 | 8743   | TNFSF10  | tumor necrosis factor (ligand) superfamily, member 10 OR tumor necrosis factor (ligand) super     | 3.65 | Yes |
| 214550_s_at                 | 23534  | TNPO3    | transportin 3                                                                                     | 1.64 | No  |
| 208901_s_at                 | 7150   | TOP1     | topoisomerase (DNA) I                                                                             | 1.37 | No  |
| 201291_s_at                 | 7153   | TOP2A    | topoisomerase (DNA) II alpha 170kDa                                                               | 8.59 | Yes |
| 201292_at                   | 7153   | TOP2A    | topoisomerase (DNA) II alpha 170kDa                                                               | 4.97 | Yes |
| 202349_at                   | 1861   | TOR1A    | torsin family 1, member A (torsin A)                                                              | 1.38 | No  |
| 210052_s_at                 | 22974  | TPX2     | TPX2, microtubule-associated, homolog (Xenopus laevis)                                            | 3.92 | No  |
| 213888_s_at                 | 80342  | TRAF3IP3 | TRAF3 interacting protein 3                                                                       | 1.62 | No  |
| 35254_at                    | 10906  | TRAFD1   | TRAF-type zinc finger domain containing 1                                                         | 1.68 | No  |
| 217959_s_at                 | 51399  | TRAPP4   | trafficking protein particle complex 4                                                            | 1.50 | No  |
| 212872_s_at                 | 9477   | TRFP     | Trf (TATA binding protein-related factor)-proximal homolog (Drosophila)                           | 1.45 | No  |
| 204804_at                   | 6737   | TRIM21   | tripartite motif-containing 21                                                                    | 1.47 | No  |
| 203567_s_at                 | 10475  | TRIM38   | tripartite motif-containing 38                                                                    | 1.43 | Yes |
| 203732_at                   | 9325   | TRIP4    | thyroid hormone receptor interactor 4                                                             | 1.34 | No  |
| 221952_x_at                 | 57570  | TRMT5    | TRM5 tRNA methyltransferase 5 homolog (S. cerevisiae)                                             | 1.45 | No  |
| 212852_s_at                 | 6738   | TROVE2   | TROVE domain family, member 2                                                                     | 1.36 | No  |
| 204822_at                   | 7272   | TTK      | TTK protein kinase                                                                                | 4.39 | Yes |
| 212320_at                   | 203068 | TUBB     | tubulin, beta polypeptide                                                                         | 1.56 | No  |
| 201714_at                   | 7283   | TUBG1    | tubulin, gamma 1                                                                                  | 2.11 | No  |
| 208864_s_at                 | 7295   | TXN      | thioredoxin                                                                                       | 1.47 | No  |
| 203008_x_at                 | 10190  | TXNDC9   | thioredoxin domain containing 9                                                                   | 1.64 | No  |
| 211758_x_at                 | 10190  | TXNDC9   | thioredoxin domain containing 9 OR thioredoxin domain containing 9                                | 1.73 | No  |
| 202589_at                   | 7298   | TYMS     | thymidylate synthetase                                                                            | 5.76 | Yes |
| 201899_s_at                 | 7319   | UBE2A    | ubiquitin-conjugating enzyme E2A (RAD6 homolog)                                                   | 1.56 | No  |
| 202954_at                   | 11065  | UBE2C    | ubiquitin-conjugating enzyme E2C                                                                  | 2.18 | No  |
| 200684_s_at                 | 7332   | UBE2L3   | ubiquitin-conjugating enzyme E2L 3                                                                | 1.46 | No  |
| 201649_at                   | 9246   | UBE2L6   | ubiquitin-conjugating enzyme E2L 6                                                                | 1.63 | Yes |
| 202330_s_at                 | 7374   | UNG      | uracil-DNA glycosylase                                                                            | 1.89 | No  |
| 202412_s_at                 | 7398   | USP1     | ubiquitin specific peptidase 1                                                                    | 1.62 | No  |
| 219211_at                   | 11274  | USP18    | ubiquitin specific peptidase 18                                                                   | 5.55 | Yes |
| 208845_at                   | 7419   | VDAC3    | voltage-dependent anion channel 3                                                                 | 1.32 | No  |
| 205922_at                   | 8875   | VNN2     | vanin 2 OR vanin 2                                                                                | 1.52 | No  |
| 217727_x_at                 | 55737  | VPS35    | vacuolar protein sorting 35 (yeast)                                                               | 1.41 | No  |
| 221998_s_at                 | 51231  | VRK3     | vaccinia related kinase 3                                                                         | 1.60 | No  |
| 202665_s_at                 | 7456   | WASPIP   | Wiskott-Aldrich syndrome protein interacting protein                                              | 1.49 | No  |
| 201886_at                   | 80344  | WDR23    | WD repeat domain 23                                                                               | 1.53 | No  |
| 221744_at                   | 10238  | WDR68    | WD repeat domain 68                                                                               | 1.61 | No  |
| 221745_at                   | 10238  | WDR68    | WD repeat domain 68                                                                               | 1.64 | No  |
| 218069_at                   | 79077  | XTP3TPA  | XTP3-transactivated protein A                                                                     | 1.70 | Yes |
| 212048_s_at                 | 8565   | YARS     | tyrosyl-tRNA synthetase                                                                           | 1.55 | No  |
| 202418_at                   | 10897  | YIF1A    | Yip1 interacting factor homolog A (S. cerevisiae)                                                 | 1.33 | No  |
| 210996_s_at                 | 7531   | YWHAE    | tyrosine 3-monooxygenase/tryptophan 5-monooxygenase activation protein, epsilon polypeptide       | 1.64 | No  |
| 221613_s_at                 | 54469  | ZA20D3   | zinc finger, A20 domain containing 3                                                              | 1.59 | No  |
| 208087_s_at                 | 81030  | ZBP1     | Z-DNA binding protein 1 OR Z-DNA binding protein 1                                                | 2.28 | Yes |
| 220933_s_at                 | 79670  | ZCCHC6   | zinc finger, CCHC domain containing 6                                                             | 1.46 | No  |
| 219296_at                   | 54503  | ZDHHC13  | zinc finger, DHHC-type containing 13                                                              | 1.41 | No  |
| 202939_at                   | 10269  | ZMPSTE24 | zinc metalloproteinase (STE24 homolog, yeast)                                                     | 1.45 | No  |
| 209944_at                   | 57862  | ZNF410   | zinc finger protein 410                                                                           | 1.49 | No  |



|             |                                                                     |               |                                                                                                  |      |    |
|-------------|---------------------------------------------------------------------|---------------|--------------------------------------------------------------------------------------------------|------|----|
| 204489_s_at | 960                                                                 | CD44          | CD44 antigen (homing function and Indian blood group system)                                     | 1.29 | No |
| 204490_s_at | 960                                                                 | CD44          | CD44 antigen (homing function and Indian blood group system)                                     | 1.57 | No |
| 209835_x_at | 960                                                                 | CD44          | CD44 antigen (homing function and Indian blood group system)                                     | 1.80 | No |
| 212014_x_at | 960                                                                 | CD44          | CD44 antigen (homing function and Indian blood group system)                                     | 1.77 | No |
| 212063_at   | 960                                                                 | CD44          | CD44 antigen (homing function and Indian blood group system)                                     | 1.36 | No |
| 217523_at   | 960                                                                 | CD44          | CD44 antigen (homing function and Indian blood group system)                                     | 1.56 | No |
| 200985_s_at | 966                                                                 | CD59          | CD59 antigen p18-20 (antigen identified by monoclonal antibodies 16.3A5, EJ16, EJ30, EL32 ;      | 1.35 | No |
| 214551_s_at | 924                                                                 | CD7           | CD7 antigen (p41)                                                                                | 1.47 | No |
| 204440_at   | 9308                                                                | CD83          | CD83 antigen (activated B lymphocytes, immunoglobulin superfamily)                               | 1.42 | No |
| 201005_at   | 928                                                                 | CD9           | CD9 antigen (p24)                                                                                | 2.99 | No |
| 221556_at   | 8555                                                                | CDC14B        | CDC14 cell division cycle 14 homolog B (S. cerevisiae)                                           | 1.93 | No |
| 219343_at   | 55664                                                               | CDC37L1       | CDC37 cell division cycle 37 homolog (S. cerevisiae)-like 1                                      | 1.40 | No |
| 206898_at   | 28513                                                               | CDH19         | cadherin 19, type 2                                                                              | 1.76 | No |
| 202284_s_at | 1026                                                                | CDKN1A        | cyclin-dependent kinase inhibitor 1A (p21, Cip1)                                                 | 2.13 | No |
| 209112_at   | 1027                                                                | CDKN1B        | cyclin-dependent kinase inhibitor 1B (p27, Kip1)                                                 | 1.52 | No |
| 213183_s_at | 1028                                                                | CDKN1C        | Cyclin-dependent kinase inhibitor 1C (p57, Kip2)                                                 | 1.59 | No |
| 213348_at   | 1028                                                                | CDKN1C        | Cyclin-dependent kinase inhibitor 1C (p57, Kip2)                                                 | 1.61 | No |
| 210240_s_at | 1032                                                                | CDKN2D        | cyclin-dependent kinase inhibitor 2D (p19, inhibits CDK4)                                        | 1.48 | No |
| 209501_at   | 1039                                                                | CDR2          | cerebellar degeneration-related protein 2, 62kDa                                                 | 1.38 | No |
| 204066_s_at | 116987                                                              | CENTG2        | centaurin, gamma 2                                                                               | 1.62 | No |
| 204605_at   | 10668                                                               | CGRRF1        | cell growth regulator with ring finger domain 1                                                  | 1.45 | No |
| 219049_at   | 55790                                                               | ChGn          | chondroitin beta1,4 N-acetylgalactosaminyltransferase                                            | 2.11 | No |
| 218177_at   | 57132                                                               | CHMP1B        | chromatin modifying protein 1B                                                                   | 1.40 | No |
| 218178_s_at | 57132                                                               | CHMP1B        | chromatin modifying protein 1B                                                                   | 1.49 | No |
| 221675_s_at | 56994                                                               | CHPT1         | choline phosphotransferase 1                                                                     | 1.56 | No |
| 200811_at   | 1153                                                                | CIRBP         | cold inducible RNA binding protein                                                               | 1.56 | No |
| 207980_s_at | 10370                                                               | CITED2        | Cbp/p300-interacting transactivator, with Glu/Asp-rich carboxy-terminal domain, 2                | 1.51 | No |
| 200999_s_at | 10970                                                               | CKAP4         | cytoskeleton-associated protein 4                                                                | 2.37 | No |
| 200998_s_at | 10970                                                               | CKAP4         | cytoskeleton-associated protein 4                                                                | 1.71 | No |
| 218223_s_at | 51177                                                               | CKIP-1        | CK2 interacting protein 1; HQ0024c protein                                                       | 1.56 | No |
| 220496_at   | 51266                                                               | CLEC1B        | C-type lectin domain family 1, member B                                                          | 1.93 | No |
| 201560_at   | 25932                                                               | CLIC4         | chloride intracellular channel 4                                                                 | 2.75 | No |
| 214683_s_at | 1195                                                                | CLK1          | CDC-like kinase 1                                                                                | 1.34 | No |
| 210346_s_at | 57396                                                               | CLK4          | CDC-like kinase 4                                                                                | 1.36 | No |
| 214252_s_at | 1203                                                                | CLN5          | ceroid-lipofuscinosis, neuronal 5                                                                | 1.48 | No |
| 208791_at   | 1191                                                                | CLU           | clusterin (complement lysis inhibitor, SP-40,40, sulfated glycoprotein 2, testosterone-repressec | 2.47 | No |
| 208792_s_at | 1191                                                                | CLU           | clusterin (complement lysis inhibitor, SP-40,40, sulfated glycoprotein 2, testosterone-repressec | 2.19 | No |
| 217870_s_at | 51727                                                               | CMPK          | cytidylate kinase                                                                                | 1.28 | No |
| 201445_at   | 1266                                                                | CNN3          | calponin 3, acidic                                                                               | 2.13 | No |
| 217798_at   | 4848                                                                | CNOT2         | CCR4-NOT transcription complex, subunit 2                                                        | 1.29 | No |
| 209081_s_at | 80781                                                               | COL18A1       | collagen, type XVIII, alpha 1                                                                    | 2.88 | No |
| 209156_s_at | 1292                                                                | COL6A2        | collagen, type VI, alpha 2                                                                       | 2.09 | No |
| 211727_s_at | 1353                                                                | COX11         | COX11 homolog, cytochrome c oxidase assembly protein (yeast) OR COX11 homolog, cytoch            | 1.43 | No |
| 202160_at   | 1387                                                                | CREBBP        | CREB binding protein (Rubinstein-Taybi syndrome)                                                 | 1.39 | No |
| 201988_s_at | 1389                                                                | CREBL2        | cAMP responsive element binding protein-like 2                                                   | 1.31 | No |
| 201200_at   | 8804                                                                | CREG1         | cellular repressor of E1A-stimulated genes 1                                                     | 1.43 | No |
| 205474_at   | 51379                                                               | CRLF3         | cytokine receptor-like factor 3                                                                  | 1.32 | No |
| 201380_at   | 10491                                                               | CRTP          | cartilage associated protein                                                                     | 1.42 | No |
| 209674_at   | 1407                                                                | CRY1          | cryptochrome 1 (photolyase-like)                                                                 | 1.79 | No |
| 220753_s_at | 51084                                                               | CRYL1         | crystallin, lambda 1                                                                             | 1.34 | No |
| 201360_at   | 1471                                                                | CST3          | cystatin C (amyloid angiopathy and cerebral hemorrhage)                                          | 1.70 | No |
| 218923_at   | 1486                                                                | CTBS          | chitobiasis, di-N-acetyl-                                                                        | 1.46 | No |
| 201906_s_at | 10217                                                               | CTDSPL        | CTD (carboxy-terminal domain, RNA polymerase II, polypeptide A) small phosphatase-like           | 2.18 | No |
| 217127_at   | 1491                                                                | CTH           | cystathionase (cystathionine gamma-lyase)                                                        | 1.62 | No |
| 203657_s_at | 8722                                                                | CTSF          | cathepsin F                                                                                      | 1.52 | No |
| 203758_at   | 1519                                                                | CTSO          | cathepsin O                                                                                      | 1.53 | No |
| 214743_at   | 1523                                                                | CUTL1         | cut-like 1, CCAAT displacement protein (Drosophila)                                              | 2.03 | No |
| 214974_x_at | 6374                                                                | CXCL5         | chemokine (C-X-C motif) ligand 5                                                                 | 3.38 | No |
| 209201_x_at | 7852                                                                | CXCR4         | chemokine (C-X-C motif) receptor 4                                                               | 1.36 | No |
| 211919_s_at | 7852                                                                | CXCR4         | chemokine (C-X-C motif) receptor 4 OR chemokine (C-X-C motif) receptor 4                         | 1.41 | No |
| 202263_at   | 51706                                                               | CYB5R1        | cytochrome b5 reductase 1                                                                        | 1.47 | No |
| 201885_s_at | 1727                                                                | CYB5R3        | cytochrome b5 reductase 3                                                                        | 1.39 | No |
| 203923_s_at | 1536                                                                | CYBB          | cytochrome b-245, beta polypeptide (chronic granulomatous disease)                               | 1.60 | No |
| 220999_s_at | 26999                                                               | CYFIP2        | cytoplasmic FMR1 interacting protein 2 OR cytoplasmic FMR1 interacting protein 2                 | 1.38 | No |
| 60084_at    | 1540                                                                | CYLD          | cylandromatosis (turban tumor syndrome)                                                          | 1.35 | No |
| 216060_s_at | 23002                                                               | DAAM1         | dishevelled associated activator of morphogenesis 1                                              | 1.51 | No |
| 210757_x_at | 1601                                                                | DAB2          | disabled homolog 2, mitogen-responsive phosphoprotein (Drosophila)                               | 1.87 | No |
| 201278_at   | 1601                                                                | DAB2          | Disabled homolog 2, mitogen-responsive phosphoprotein (Drosophila)                               | 1.74 | No |
| 201280_s_at | 1601                                                                | DAB2          | disabled homolog 2, mitogen-responsive phosphoprotein (Drosophila)                               | 2.53 | No |
| 201925_s_at | 1604                                                                | DAF           | decay accelerating factor for complement (CD55, Cromer blood group system)                       | 1.69 | No |
| 201095_at   | 1611                                                                | DAP           | death-associated protein                                                                         | 1.33 | No |
| 217025_s_at | 1627                                                                | DBN1          | drebrin 1                                                                                        | 1.87 | No |
| 222101_s_at | 8642                                                                | DCHS1         | dachsous 1 (Drosophila)                                                                          | 2.01 | No |
| 212690_at   | 23259                                                               | DDHD2         | DDHD domain containing 2                                                                         | 1.40 | No |
| 202887_s_at | 54541                                                               | DDIT4         | DNA-damage-inducible transcript 4                                                                | 1.50 | No |
| 212515_s_at | 1654                                                                | DDX3X         | DEAD (Asp-Glu-Ala-Asp) box polypeptide 3, X-linked                                               | 1.63 | No |
| 220004_at   | 55510                                                               | DDX43         | DEAD (Asp-Glu-Ala-Asp) box polypeptide 43                                                        | 1.72 | No |
| 211272_s_at | 1606                                                                | DGKA          | diacylglycerol kinase, alpha 80kDa                                                               | 1.41 | No |
| 208072_s_at | 8527                                                                | DGKD          | diacylglycerol kinase, delta 130kDa                                                              | 1.46 | No |
| 202481_at   | 9249                                                                | DHRS3         | dehydrogenase/reductase (SDR family) member 3                                                    | 1.78 | No |
| 210788_s_at | 51635                                                               | DHRS7         | dehydrogenase/reductase (SDR family) member 7                                                    | 1.37 | No |
| 217989_at   | 51170                                                               | DHRS8         | dehydrogenase/reductase (SDR family) member 8                                                    | 1.33 | No |
| 218277_s_at | 79665                                                               | DHX40         | DEAH (Asp-Glu-Ala-His) box polypeptide 40                                                        | 1.33 | No |
| 201104_x_at | 32 OR 284565 OR 440670 OR 440673 OR 44 OR LOC200030 OR MGC8902 OR F |               | hypothetical protein DJ328E19.C1.1 OR hypothetical protein FLJ20719 OR hypothetical protei       | 1.38 | No |
| 214693_x_at | 284565 OR 401967 OR 440670 OR 440673C200030 OR MGC8902 OR LOC4019   |               | hypothetical protein DJ328E19.C1.1 OR hypothetical protein FLJ20719 OR hypothetical protei       | 1.45 | No |
| 214717_at   | 150967                                                              | DKFZp434H1419 | hypothetical protein DKFZp434H1419                                                               | 1.85 | No |
| 212936_at   | 83989                                                               | DKFZp564D172  | hypothetical protein DKFZp564D172                                                                | 1.35 | No |
| 200664_s_at | 3337                                                                | DNAJB1        | DnaJ (Hsp40) homolog, subfamily B, member 1                                                      | 1.53 | No |
| 202842_s_at | 4189                                                                | DNAJB9        | DnaJ (Hsp40) homolog, subfamily B, member 9                                                      | 1.49 | No |
| 202843_at   | 4189                                                                | DNAJB9        | DnaJ (Hsp40) homolog, subfamily B, member 9                                                      | 1.66 | No |
| 204720_s_at | 9829                                                                | DNAJC6        | DnaJ (Hsp40) homolog, subfamily C, member 6                                                      | 1.78 | No |
| 209839_at   | 26052                                                               | DNM3          | dynamain 3                                                                                       | 1.82 | No |
| 212538_at   | 23348                                                               | DOCK9         | dedicator of cytokinesis 9                                                                       | 1.65 | No |
| 219452_at   | 64174                                                               | DPEP2         | dipeptidase 2                                                                                    | 2.05 | No |
| 204646_at   | 1806                                                                | DPYD          | dihydropyrimidine dehydrogenase                                                                  | 1.54 | No |
| 207324_s_at | 1823                                                                | DSC1          | desmocollin 1                                                                                    | 2.41 | No |
| 219864_s_at | 11123                                                               | DSCR1L2       | Down syndrome critical region gene 1-like 2                                                      | 2.15 | No |
| 201044_x_at | 1843                                                                | DUSP1         | dual specificity phosphatase 1                                                                   | 1.85 | No |
| 203367_at   | 11072                                                               | DUSP14        | dual specificity phosphatase 14                                                                  | 1.38 | No |
| 201536_at   | 1845                                                                | DUSP3         | dual specificity phosphatase 3 (vaccinia virus phosphatase VH1-related)                          | 1.67 | No |
| 203624_at   | 8227                                                                | DXYS155E      | DNA segment on chromosome X and Y (unique) 155 expressed sequence                                | 1.36 | No |
| 203279_at   | 9695                                                                | EDEM1         | ER degradation enhancer, mannosidase alpha-like 1                                                | 1.40 | No |
| 204642_at   | 1901                                                                | EDG1          | endothelial differentiation, sphingolipid G-protein-coupled receptor, 1                          | 1.59 | No |
| 206722_s_at | 9170                                                                | EDG4          | endothelial differentiation, lysophosphatidic acid G-protein-coupled receptor, 4                 | 1.41 | No |
| 200705_s_at | 1933                                                                | EEF1B2        | eukaryotic translation elongation factor 1 beta 2                                                | 1.40 | No |
| 203113_s_at | 1936                                                                | EEF1D         | eukaryotic translation elongation factor 1 delta (guanine nucleotide exchange protein)           | 1.46 | No |
| 220591_s_at | 80258                                                               | EFHC2         | EF-hand domain (C-terminal) containing 2                                                         | 1.60 | No |
| 218935_at   | 30845                                                               | EHD3          | EH-domain containing 3                                                                           | 2.36 | No |
| 201018_at   | 1964                                                                | EIF1AX        | eukaryotic translation initiation factor 1A, X-linked                                            | 1.53 | No |
| 217719_at   | 51386                                                               | EIF356IP      | eukaryotic translation initiation factor 3, subunit 6 interacting protein                        | 1.41 | No |
| 211937_at   | 1975                                                                | EIF4B         | eukaryotic translation initiation factor 4B                                                      | 1.58 | No |
| 211938_at   | 1975                                                                | EIF4B         | eukaryotic translation initiation factor 4B                                                      | 1.48 | No |



|             |                                                                    |                                                                                           |                                                                                                  |      |    |
|-------------|--------------------------------------------------------------------|-------------------------------------------------------------------------------------------|--------------------------------------------------------------------------------------------------|------|----|
| 208707_at   | 1983                                                               | EIF5                                                                                      | eukaryotic translation initiation factor 5                                                       | 1.52 | No |
| 208706_s_at | 1983                                                               | EIF5                                                                                      | eukaryotic translation initiation factor 5                                                       | 1.66 | No |
| 201123_s_at | 1984                                                               | EIF5A                                                                                     | eukaryotic translation initiation factor 5A                                                      | 1.99 | No |
| 201313_at   | 2026                                                               | ENO2                                                                                      | enolase 2 (gamma, neuronal)                                                                      | 1.54 | No |
| 204076_at   | 9583                                                               | ENTPD4                                                                                    | ectonucleoside triphosphate diphosphohydrolase 4                                                 | 1.33 | No |
| 211776_s_at | 23136                                                              | EPB41L3                                                                                   | erythrocyte membrane protein band 4.1-like 3 OR erythrocyte membrane protein band 4.1-like       | 1.58 | No |
| 209368_at   | 2053                                                               | EPHX2                                                                                     | epoxide hydrolase 2, cytoplasmic                                                                 | 3.04 | No |
| 37986_at    | 2057                                                               | EPOR                                                                                      | erythropoietin receptor                                                                          | 1.55 | No |
| 202414_at   | 2073                                                               | ERCC5                                                                                     | excision repair cross-complementing rodent repair deficiency, complementation group 5 (xerod     | 1.31 | No |
| 201995_at   | 2131                                                               | EXT1                                                                                      | exostoses (multiple) 1                                                                           | 1.48 | No |
| 203305_at   | 2162                                                               | F13A1                                                                                     | coagulation factor XIII, A1 polypeptide                                                          | 3.10 | No |
| 219253_at   | 79134                                                              | FAM11B                                                                                    | family with sequence similarity 11, member B                                                     | 1.46 | No |
| 218446_s_at | 51030                                                              | FAM18B                                                                                    | family with sequence similarity 18, member B                                                     | 1.56 | No |
| 220147_s_at | 58516                                                              | FAM60A                                                                                    | family with sequence similarity 60, member A                                                     | 1.34 | No |
| 221856_s_at | 55793                                                              | FAM63A                                                                                    | family with sequence similarity 63, member A                                                     | 1.70 | No |
| 211623_s_at | 2091                                                               | FBL                                                                                       | fibrillarlin OR fibrillarlin                                                                     | 1.42 | No |
| 212231_at   | 23014                                                              | FBXO21                                                                                    | F-box protein 21                                                                                 | 1.33 | No |
| 203240_at   | 8857                                                               | FCGBP                                                                                     | Fc fragment of IgG binding protein                                                               | 2.38 | No |
| 212374_at   | 10116                                                              | FEM1B                                                                                     | fem-1 homolog b (C. elegans)                                                                     | 1.49 | No |
| 212373_at   | 10116                                                              | FEM1B                                                                                     | fem-1 homolog b (C. elegans)                                                                     | 1.66 | No |
| 203562_at   | 9638                                                               | FEZ1                                                                                      | fasciculation and elongation protein zeta 1 (zygin I)                                            | 1.90 | No |
| 206404_at   | 2254                                                               | FGF9                                                                                      | fibroblast growth factor 9 (glia-activating factor)                                              | 2.34 | No |
| 206492_at   | 2272                                                               | FHIT                                                                                      | fragile histidine triad gene                                                                     | 1.80 | No |
| 201540_at   | 2273                                                               | FHL1                                                                                      | four and a half LIM domains 1                                                                    | 2.21 | No |
| 209688_s_at | 54520                                                              | FLJ10996                                                                                  | hypothetical protein FLJ10996                                                                    | 1.38 | No |
| 218510_x_at | 54463                                                              | FLJ20152                                                                                  | hypothetical protein FLJ20152                                                                    | 1.64 | No |
| 218532_s_at | 54463                                                              | FLJ20152                                                                                  | hypothetical protein FLJ20152                                                                    | 1.95 | No |
| 221821_s_at | 54934                                                              | FLJ20436                                                                                  | hypothetical protein FLJ20436                                                                    | 1.44 | No |
| 221229_s_at | 55006                                                              | FLJ20628                                                                                  | hypothetical protein FLJ20628 OR hypothetical protein FLJ20628                                   | 1.29 | No |
| 201103_x_at | 284565 OR 440670 OR 440673 OR 440672:00030 OR MGC8902 OR AE01 OR A | hypothetical protein FLJ20719 OR hypothetical protein LOC200030 OR hypothetical protein M | 1.40                                                                                             | No   |    |
| 211299_s_at | 2319                                                               | FLOT2                                                                                     | flotillin 2                                                                                      | 1.42 | No |
| 206980_s_at | 2323                                                               | FLT3LG                                                                                    | fms-related tyrosine kinase 3 ligand                                                             | 1.53 | No |
| 210607_at   | 2323                                                               | FLT3LG                                                                                    | fms-related tyrosine kinase 3 ligand                                                             | 1.57 | No |
| 215017_s_at | 54874                                                              | FNBP1L                                                                                    | formin binding protein 1-like                                                                    | 1.72 | No |
| 209189_at   | 2353                                                               | FOS                                                                                       | v-fos FBJ murine osteosarcoma viral oncogene homolog                                             | 1.67 | No |
| 218881_s_at | 2355                                                               | FOSL2                                                                                     | FOS-like antigen 2                                                                               | 1.65 | No |
| 202724_s_at | 2308                                                               | FOXP01A                                                                                   | forkhead box O1A (rhabdomyosarcoma)                                                              | 1.49 | No |
| 200748_s_at | 2495                                                               | FTTH1                                                                                     | ferritin, heavy polypeptide 1                                                                    | 1.41 | No |
| 218373_at   | 64400                                                              | FTS                                                                                       | fused toes homolog (mouse)                                                                       | 1.44 | No |
| 205324_s_at | 24140                                                              | FTSJ1                                                                                     | FtsJ homolog 1 (E. coli)                                                                         | 1.32 | No |
| 218084_x_at | 53827                                                              | FXYP2                                                                                     | FXYP domain containing ion transport regulator 5                                                 | 1.45 | No |
| 208840_s_at | 9908                                                               | G3BD5                                                                                     | Ras-GTPase activating protein SH3 domain-binding protein 2                                       | 1.38 | No |
| 208868_s_at | 23710                                                              | GABARAPL1                                                                                 | GABA(A) receptor-associated protein like 1                                                       | 1.60 | No |
| 203725_at   | 1647                                                               | GADD45A                                                                                   | growth arrest and DNA-damage-inducible, alpha                                                    | 2.84 | No |
| 209304_x_at | 4616                                                               | GADD45B                                                                                   | growth arrest and DNA-damage-inducible, beta                                                     | 1.42 | No |
| 207574_s_at | 4616                                                               | GADD45B                                                                                   | growth arrest and DNA-damage-inducible, beta                                                     | 1.55 | No |
| 209305_s_at | 4616                                                               | GADD45B                                                                                   | growth arrest and DNA-damage-inducible, beta                                                     | 1.52 | No |
| 218885_s_at | 79695                                                              | GALNT12                                                                                   | UDP-N-acetyl-alpha-D-galactosamine:polypeptide N-acetylgalactosaminyltransferase 12 (GalT        | 1.46 | No |
| 214855_s_at | 253959                                                             | GARNL1                                                                                    | GTPase activating Rap/RanGAP domain-like 1                                                       | 1.39 | No |
| 31874_at    | 10634                                                              | GAS2L1                                                                                    | growth arrest-specific 2 like 1                                                                  | 2.06 | No |
| 201738_at   | 10289                                                              | GC20                                                                                      | translation factor sui1 homolog                                                                  | 1.40 | No |
| 219015_s_at | 55849                                                              | GLT28D1                                                                                   | glycosyltransferase 28 domain containing 1                                                       | 1.59 | No |
| 200648_s_at | 2752                                                               | GLUL                                                                                      | glutamate-ammonia ligase (glutamine synthetase)                                                  | 1.60 | No |
| 215001_s_at | 2752                                                               | GLUL                                                                                      | glutamate-ammonia ligase (glutamine synthetase)                                                  | 1.56 | No |
| 206917_at   | 10672                                                              | GNA13                                                                                     | guanine nucleotide binding protein (G protein), alpha 13                                         | 1.44 | No |
| 202615_at   | 2776                                                               | GNAQ                                                                                      | Guanine nucleotide binding protein (G protein), q polypeptide                                    | 1.63 | No |
| 214157_at   | 2778                                                               | GNAS                                                                                      | GNAS complex locus                                                                               | 1.60 | No |
| 204993_at   | 2781                                                               | GNAZ                                                                                      | guanine nucleotide binding protein (G protein), alpha z polypeptide                              | 1.72 | No |
| 204000_at   | 10681                                                              | GNB5                                                                                      | guanine nucleotide binding protein (G protein), beta 5                                           | 1.33 | No |
| 204115_at   | 2791                                                               | GNG11                                                                                     | guanine nucleotide binding protein (G protein), gamma 11                                         | 2.48 | No |
| 202382_s_at | 10007                                                              | GNPDA1                                                                                    | glucosamine-6-phosphate deaminase 1                                                              | 1.68 | No |
| 208798_x_at | 23015                                                              | GOLGA8A                                                                                   | golgi autoantigen, golgin subfamily a, 8A                                                        | 1.74 | No |
| 210425_x_at | 440270                                                             | GOLGA8B                                                                                   | golgi autoantigen, golgin subfamily a, 8B                                                        | 1.90 | No |
| 206655_s_at | 2812                                                               | GP1BB                                                                                     | glycoprotein Ib (platelet), beta polypeptide                                                     | 2.21 | No |
| 207926_at   | 2814                                                               | GP5                                                                                       | glycoprotein V (platelet)                                                                        | 1.91 | No |
| 220336_s_at | 51206                                                              | GP6                                                                                       | glycoprotein VI (platelet)                                                                       | 1.87 | No |
| 204793_at   | 9737                                                               | GRASP1                                                                                    | G protein-coupled receptor associated sorting protein 1                                          | 1.83 | No |
| 200736_s_at | 2876                                                               | GPX1                                                                                      | glutathione peroxidase 1                                                                         | 1.55 | No |
| 201106_at   | 2879                                                               | GPX4                                                                                      | glutathione peroxidase 4 (phospholipid hydroperoxidase)                                          | 1.63 | No |
| 212434_at   | 80273                                                              | GRPEL1                                                                                    | GrpE-like 1, mitochondrial (E. coli)                                                             | 1.32 | No |
| 204550_x_at | 2944                                                               | GSTM1                                                                                     | glutathione S-transferase M1                                                                     | 1.63 | No |
| 215333_x_at | 2944                                                               | GSTM1                                                                                     | glutathione S-transferase M1                                                                     | 1.74 | No |
| 204418_x_at | 2946                                                               | GSTM2                                                                                     | glutathione S-transferase M2 (muscle)                                                            | 1.83 | No |
| 203817_at   | 2963                                                               | <b>GUCY1B3</b>                                                                            | <b>guanylate cyclase 1, soluble, beta 3</b>                                                      | 2.34 | No |
| 212206_s_at | 94239                                                              | H2AFV                                                                                     | H2A histone family, member V                                                                     | 1.36 | No |
| 221425_s_at | 81689                                                              | HBLD2                                                                                     | HESB like domain containing 2 OR HESB like domain containing 2                                   | 1.52 | No |
| 209102_s_at | 26959                                                              | HBP1                                                                                      | HMG-box transcription factor 1                                                                   | 1.39 | No |
| 218603_at   | 51696                                                              | HECA                                                                                      | headcase homolog (Drosophila)                                                                    | 1.32 | No |
| 214308_s_at | 3081                                                               | HGD                                                                                       | homogentisate 1,2-dioxygenase (homogentisate oxidase)                                            | 1.82 | No |
| 212964_at   | 23119                                                              | HIC2                                                                                      | hypermethylated in cancer 2                                                                      | 1.72 | No |
| 212966_at   | 23119                                                              | HIC2                                                                                      | hypermethylated in cancer 2                                                                      | 1.78 | No |
| 207721_x_at | 3094                                                               | HINT1                                                                                     | histidine triad nucleotide binding protein 1                                                     | 1.31 | No |
| 202708_s_at | 8349                                                               | HIST2H2BE                                                                                 | histone 2, H2be                                                                                  | 1.49 | No |
| 204512_at   | 3096                                                               | HIVEP1                                                                                    | human immunodeficiency virus type 1 enhancer binding protein 1                                   | 1.91 | No |
| 201054_at   | 10949                                                              | HNRPA0                                                                                    | heterogeneous nuclear ribonucleoprotein A0                                                       | 1.64 | No |
| 209068_at   | 9987                                                               | HNRPDL                                                                                    | heterogeneous nuclear ribonucleoprotein D-like                                                   | 1.33 | No |
| 207127_s_at | 3189                                                               | HNRPH3                                                                                    | heterogeneous nuclear ribonucleoprotein H3 (2H9)                                                 | 1.42 | No |
| 205462_s_at | 3241                                                               | HPCAL1                                                                                    | hippocalcin-like 1                                                                               | 1.37 | No |
| 203913_s_at | 3248                                                               | HPGD                                                                                      | hydroxyprostaglandin dehydrogenase 15-(NAD)                                                      | 1.88 | No |
| 211548_s_at | 3248                                                               | HPGD                                                                                      | hydroxyprostaglandin dehydrogenase 15-(NAD)                                                      | 2.13 | No |
| 209657_s_at | 3298                                                               | HSF2                                                                                      | heat shock transcription factor 2                                                                | 1.51 | No |
| 211220_s_at | 3298                                                               | HSF2                                                                                      | heat shock transcription factor 2                                                                | 1.65 | No |
| 201841_s_at | 3315                                                               | HSPB1                                                                                     | heat shock 27kDa protein 1                                                                       | 1.85 | No |
| 220692_at   | 29060                                                              | HSPC047                                                                                   | HSPC047 protein                                                                                  | 1.53 | No |
| 218936_s_at | 29080                                                              | HSPC128                                                                                   | HSPC128 protein                                                                                  | 1.39 | No |
| 214359_s_at | 3326                                                               | HSPC8                                                                                     | heat shock 90kDa protein 1, beta                                                                 | 1.41 | No |
| 218099_at   | 55852                                                              | HT008                                                                                     | uncharacterized hypothalamus protein HT008                                                       | 1.69 | No |
| 215038_s_at | 29072                                                              | HYPB                                                                                      | huntingtin interacting protein B                                                                 | 1.37 | No |
| 201566_x_at | 3398 OR 84099                                                      | ID2 OR ID2B                                                                               | inhibitor of DNA binding 2, dominant negative helix-loop-helix protein OR inhibitor of DNA bindi | 1.72 | No |
| 204615_x_at | 3422                                                               | ID1                                                                                       | isopentenyl-diphosphate delta isomerase 1                                                        | 1.60 | No |
| 208881_x_at | 3422                                                               | ID1                                                                                       | isopentenyl-diphosphate delta isomerase 1                                                        | 1.58 | No |
| 218611_at   | 51278                                                              | IER5                                                                                      | immediate early response 5                                                                       | 1.65 | No |
| 202727_s_at | 3459                                                               | IFNGR1                                                                                    | interferon gamma receptor 1                                                                      | 1.39 | No |
| 211676_s_at | 3459                                                               | IFNGR1                                                                                    | interferon gamma receptor 1 OR interferon gamma receptor 1                                       | 1.46 | No |
| 202146_at   | 3475                                                               | IFRD1                                                                                     | interferon-related developmental regulator 1                                                     | 1.45 | No |
| 202147_s_at | 3475                                                               | IFRD1                                                                                     | interferon-related developmental regulator 1                                                     | 1.90 | No |
| 203628_at   | 3480                                                               | IGF1R                                                                                     | insulin-like growth factor 1 receptor                                                            | 4.32 | No |
| 203627_at   | 3480                                                               | IGF1R                                                                                     | Insulin-like growth factor 1 receptor                                                            | 2.22 | No |
| 202490_at   | 8518                                                               | IKBKAP                                                                                    | inhibitor of kappa light polypeptide gene enhancer in B-cells, kinase complex-associated protei  | 1.40 | No |
| 220054_at   | 51561                                                              | IL23A                                                                                     | interleukin 23, alpha subunit p19                                                                | 1.53 | No |
| 205945_at   | 3570                                                               | IL6R                                                                                      | interleukin 6 receptor OR interleukin 6 receptor                                                 | 1.80 | No |
| 212195_at   | 3572                                                               | <b>IL6ST</b>                                                                              | MRNA; cDNA DKFZp564F053 (from clone DKFZp564F053)                                                | 1.83 | No |

|             |                                                                       |                                                                                                |                                                                                                      |      |    |
|-------------|-----------------------------------------------------------------------|------------------------------------------------------------------------------------------------|------------------------------------------------------------------------------------------------------|------|----|
| 212196_at   | 3572                                                                  | IL6ST                                                                                          | MRNA; cDNA DKFZp564F053 (from clone DKFZp564F053)                                                    | 1.71 | No |
| 205798_at   | 3575                                                                  | IL7R                                                                                           | interleukin 7 receptor OR interleukin 7 receptor                                                     | 1.54 | No |
| 208415_x_at | 3621                                                                  | ING1                                                                                           | inhibitor of growth family, member 1                                                                 | 1.45 | No |
| 203006_at   | 3632                                                                  | INPP5A                                                                                         | inositol polyphosphate-5-phosphatase, 40kDa                                                          | 1.40 | No |
| 209184_s_at | 8660                                                                  | IRS2                                                                                           | insulin receptor substrate 2                                                                         | 1.68 | No |
| 209185_s_at | 8660                                                                  | IRS2                                                                                           | insulin receptor substrate 2                                                                         | 2.47 | No |
| 216956_s_at | 3674                                                                  | ITGA2B                                                                                         | integrin, alpha 2b (platelet glycoprotein IIb of IIb/IIIa complex, antigen CD41B)                    | 2.10 | No |
| 206493_at   | 3674                                                                  | ITGA2B                                                                                         | integrin, alpha 2b (platelet glycoprotein IIb of IIb/IIIa complex, antigen CD41B)                    | 2.13 | No |
| 215177_s_at | 3655                                                                  | ITGA6                                                                                          | integrin, alpha 6                                                                                    | 2.38 | No |
| 201656_at   | 3655                                                                  | ITGA6                                                                                          | integrin, alpha 6                                                                                    | 2.06 | No |
| 204627_s_at | 3690                                                                  | ITGB3                                                                                          | integrin, beta 3 (platelet glycoprotein IIIa, antigen CD61)                                          | 3.67 | No |
| 204628_s_at | 3690                                                                  | ITGB3                                                                                          | integrin, beta 3 (platelet glycoprotein IIIa, antigen CD61)                                          | 2.12 | No |
| 214020_x_at | 3693                                                                  | ITGB5                                                                                          | Integrin, beta 5                                                                                     | 3.78 | No |
| 203723_at   | 3707                                                                  | ITPKB                                                                                          | inositol 1,4,5-trisphosphate 3-kinase B                                                              | 1.51 | No |
| 209898_x_at | 50618                                                                 | ITSN2                                                                                          | intersectin 2                                                                                        | 1.32 | No |
| 212813_at   | 83700                                                                 | JAM3                                                                                           | junctional adhesion molecule 3                                                                       | 2.04 | No |
| 212689_s_at | 55818                                                                 | JMJD1A                                                                                         | jumonji domain containing 1A                                                                         | 1.33 | No |
| 221763_at   | 221037                                                                | JMJD1C                                                                                         | jumonji domain containing 1C                                                                         | 1.74 | No |
| 213146_at   | 23135                                                                 | JMJD3                                                                                          | jumonji domain containing 3                                                                          | 1.60 | No |
| 41386_l_at  | 23135                                                                 | JMJD3                                                                                          | jumonji domain containing 3                                                                          | 1.44 | No |
| 41387_r_at  | 23135                                                                 | JMJD3                                                                                          | jumonji domain containing 3                                                                          | 1.52 | No |
| 201473_at   | 3726                                                                  | JUNB                                                                                           | jun B proto-oncogene                                                                                 | 1.67 | No |
| 203751_x_at | 3727                                                                  | JUND                                                                                           | jun D proto-oncogene                                                                                 | 1.65 | No |
| 214326_x_at | 3727                                                                  | JUND                                                                                           | jun D proto-oncogene                                                                                 | 1.74 | No |
| 221307_at   | 30820                                                                 | KCNIP1                                                                                         | Kv channel interacting protein 1                                                                     | 1.42 | No |
| 212192_at   | 115207                                                                | KCTD12                                                                                         | potassium channel tetramerisation domain containing 12                                               | 2.52 | No |
| 201751_at   | 9929                                                                  | KIAA0063                                                                                       | KIAA0063 gene product                                                                                | 1.62 | No |
| 203288_at   | 9710                                                                  | KIAA0355                                                                                       | KIAA0355                                                                                             | 1.43 | No |
| 213340_s_at | 57212                                                                 | KIAA0495                                                                                       | KIAA0495                                                                                             | 1.37 | No |
| 212946_at   | 23078                                                                 | KIAA0564                                                                                       | KIAA0564 protein                                                                                     | 1.36 | No |
| 214231_s_at | 23078                                                                 | KIAA0564                                                                                       | KIAA0564 protein                                                                                     | 1.61 | No |
| 207971_s_at | 23177                                                                 | KIAA0582                                                                                       | KIAA0582                                                                                             | 1.48 | No |
| 212675_s_at | 23177                                                                 | KIAA0582                                                                                       | KIAA0582                                                                                             | 1.72 | No |
| 215994_x_at | 23061                                                                 | KIAA0676                                                                                       | KIAA0676 protein                                                                                     | 1.27 | No |
| 212314_at   | 23231                                                                 | KIAA0746                                                                                       | KIAA0746 protein                                                                                     | 1.29 | No |
| 203322_at   | 22850                                                                 | KIAA0863                                                                                       | KIAA0863 protein                                                                                     | 1.42 | No |
| 213954_at   | 26049                                                                 | KIAA0888                                                                                       | KIAA0888 protein                                                                                     | 2.11 | No |
| 200897_s_at | 23022                                                                 | KIAA0992                                                                                       | palladin                                                                                             | 1.83 | No |
| 215146_s_at | 23331                                                                 | KIAA1043                                                                                       | KIAA1043 protein                                                                                     | 2.00 | No |
| 220368_s_at | 55671                                                                 | KIAA2010                                                                                       | KIAA2010                                                                                             | 1.53 | No |
| 218486_at   | 8462                                                                  | KLF11                                                                                          | Kruppel-like factor 11                                                                               | 1.98 | No |
| 204334_at   | 8609                                                                  | KLF7                                                                                           | Kruppel-like factor 7 (ubiquitous)                                                                   | 1.39 | No |
| 203542_s_at | 687                                                                   | KLF9                                                                                           | Kruppel-like factor 9                                                                                | 1.61 | No |
| 203543_s_at | 687                                                                   | KLF9                                                                                           | Kruppel-like factor 9                                                                                | 2.04 | No |
| 221221_s_at | 26249                                                                 | KLHL3                                                                                          | kelch-like 3 (Drosophila)                                                                            | 1.35 | No |
| 214470_at   | 3820                                                                  | KLRB1                                                                                          | killer cell lectin-like receptor subfamily B, member 1 OR killer cell lectin-like receptor subfamily | 1.77 | No |
| 220646_s_at | 51348                                                                 | KLRF1                                                                                          | killer cell lectin-like receptor subfamily F, member 1                                               | 1.83 | No |
| 214039_s_at | 55353                                                                 | LAPTM4B                                                                                        | lysosomal associated protein transmembrane 4 beta                                                    | 1.74 | No |
| 222212_s_at | 29956                                                                 | LASS2                                                                                          | LAG1 longevity assurance homolog 2 (S. cerevisiae)                                                   | 1.29 | No |
| 204012_s_at | 9836                                                                  | LCMT2                                                                                          | leucine carboxyl methyltransferase 2                                                                 | 1.34 | No |
| 221790_s_at | 26119                                                                 | LDLRAP1                                                                                        | low density lipoprotein receptor adaptor protein 1                                                   | 2.06 | No |
| 204454_at   | 23641                                                                 | LDOC1                                                                                          | leucine zipper, down-regulated in cancer 1                                                           | 1.38 | No |
| 221558_s_at | 51176                                                                 | LEF1                                                                                           | lymphoid enhancer-binding factor 1                                                                   | 1.79 | No |
| 209894_at   | 3953                                                                  | LEPR                                                                                           | leptin receptor                                                                                      | 1.86 | No |
| 202594_at   | 23484                                                                 | LEPROTL1                                                                                       | leptin receptor overlapping transcript-like 1                                                        | 1.42 | No |
| 202595_s_at | 23484                                                                 | LEPROTL1                                                                                       | leptin receptor overlapping transcript-like 1                                                        | 1.54 | No |
| 205571_at   | 51601                                                                 | LIP1                                                                                           | lipoyltransferase 1                                                                                  | 1.40 | No |
| 208190_s_at | 51599                                                                 | LISCH7                                                                                         | liver-specific bHLH-Zip transcription factor                                                         | 2.44 | No |
| 203411_s_at | 4000                                                                  | LMNA                                                                                           | lamin A/C                                                                                            | 1.78 | No |
| 212086_x_at | 4000                                                                  | LMNA                                                                                           | lamin A/C                                                                                            | 1.76 | No |
| 213212_x_at | 161527                                                                | LOC161527                                                                                      | hypothetical protein LOC161527                                                                       | 1.86 | No |
| 222307_at   | 282997                                                                | LOC282997                                                                                      | hypothetical protein LOC282997                                                                       | 1.53 | No |
| 216177_at   | 283412 OR 284064                                                      | LOC283412 OR LOC284064                                                                         | similar to 60S ribosomal protein L29 (Cell surface heparin binding protein HIP) OR similar to 6C     | 1.41 | No |
| 213737_x_at | 30 OR 388189 OR 390535 OR 400304 OR 4-88189 OR LOC390535 OR LOC400304 | hypothetical LOC283768 OR similar to hypothetical protein OR similar to hypothetical protein C | 1.74                                                                                                 | No   |    |
| 209733_at   | 286440                                                                | LOC286440                                                                                      | hypothetical protein LOC286440                                                                       | 1.60 | No |
| 81737_at    | 388221 OR 440345                                                      | LOC388221 OR LOC440345                                                                         | SLC7A5 pseudogene OR Hypothetical protein LOC440345 OR Homo sapiens, clone IMAGE:4                   | 1.60 | No |
| 65588_at    | 388796                                                                | LOC388796                                                                                      | hypothetical LOC388796                                                                               | 1.45 | No |
| 217506_at   | 400642                                                                | LOC400642                                                                                      | Hypothetical gene supported by BC041875; BX648894                                                    | 1.74 | No |
| 60794_f_at  | 400721                                                                | LOC400721                                                                                      | similar to Hypothetical zinc finger protein KIAA1956                                                 | 1.45 | No |
| 218263_s_at | 58486                                                                 | LOC58486                                                                                       | transposon-derived Buster1 transposase-like protein gene                                             | 1.38 | No |
| 47560_at    | 22859                                                                 | LPHN1                                                                                          | latrophilin 1                                                                                        | 1.69 | No |
| 219922_s_at | 4054                                                                  | LTPB3                                                                                          | latent transforming growth factor beta binding protein 3                                             | 2.04 | No |
| 215967_s_at | 4063                                                                  | LY9                                                                                            | lymphocyte antigen 9                                                                                 | 1.30 | No |
| 204952_at   | 27076                                                                 | LYPD3                                                                                          | LY6/PLAUR domain containing 3                                                                        | 3.27 | No |
| 209347_s_at | 4094                                                                  | MAF                                                                                            | v-maf musculoaponeurotic fibrosarcoma oncogene homolog (avian)                                       | 1.61 | No |
| 205193_at   | 23764                                                                 | MAFF                                                                                           | v-maf musculoaponeurotic fibrosarcoma oncogene homolog F (avian)                                     | 1.53 | No |
| 36711_at    | 23764                                                                 | MAFF                                                                                           | v-maf musculoaponeurotic fibrosarcoma oncogene homolog F (avian)                                     | 2.04 | No |
| 208309_s_at | 10892                                                                 | MALT1                                                                                          | mucosa associated lymphoid tissue lymphoma translocation gene 1                                      | 1.40 | No |
| 210018_x_at | 10892                                                                 | MALT1                                                                                          | mucosa associated lymphoid tissue lymphoma translocation gene 1                                      | 1.50 | No |
| 218918_at   | 57134                                                                 | MAN1C1                                                                                         | mannosidase, alpha, class 1C, member 1                                                               | 1.72 | No |
| 202032_s_at | 4122                                                                  | MAN2A2                                                                                         | mannosidase, alpha, class 2A, member 2                                                               | 1.47 | No |
| 219999_at   | 4122                                                                  | MAN2A2                                                                                         | mannosidase, alpha, class 2A, member 2                                                               | 1.32 | No |
| 202670_at   | 5604                                                                  | MAP2K1                                                                                         | mitogen-activated protein kinase kinase 1                                                            | 1.39 | No |
| 218311_at   | 8491                                                                  | MAP4K3                                                                                         | mitogen-activated protein kinase kinase kinase 3                                                     | 1.53 | No |
| 212871_at   | 8550                                                                  | MAPKAPK5                                                                                       | mitogen-activated protein kinase-activated protein kinase 5                                          | 1.38 | No |
| 215512_at   | 10299                                                                 | MAR6                                                                                           | membrane-associated ring finger (C3HC4) 6                                                            | 1.59 | No |
| 201737_s_at | 10299                                                                 | MAR6                                                                                           | membrane-associated ring finger (C3HC4) 6                                                            | 1.68 | No |
| 200624_s_at | 9782                                                                  | MATR3                                                                                          | matrin 3                                                                                             | 1.36 | No |
| 203640_at   | 10150                                                                 | MBNL2                                                                                          | muscleblind-like 2 (Drosophila)                                                                      | 1.46 | No |
| 204069_at   | 4211                                                                  | MEI51                                                                                          | Meis1, myeloid ecotropic viral integration site 1 homolog (mouse)                                    | 2.01 | No |
| 214077_x_at | 4213                                                                  | MEI54                                                                                          | Meis1, myeloid ecotropic viral integration site 1 homolog 4 (mouse)                                  | 1.51 | No |
| 202016_at   | 4232                                                                  | MEST                                                                                           | mesoderm specific transcript homolog (mouse)                                                         | 2.54 | No |
| 213123_at   | 4238                                                                  | MFAP3                                                                                          | Microfibrillar-associated protein 3                                                                  | 1.36 | No |
| 205442_at   | 9848                                                                  | MFAP3L                                                                                         | microfibrillar-associated protein 3-like                                                             | 3.32 | No |
| 213457_at   | 9258                                                                  | MFHAS1                                                                                         | malignant fibrous histiocytoma amplified sequence 1                                                  | 1.51 | No |
| 219797_at   | 11320                                                                 | MGAT4A                                                                                         | mannosyl (alpha-1,3-)-glycoprotein beta-1,4-N-acetylglucosaminyltransferase, isoenzyme A             | 1.34 | No |
| 221756_at   | 113791                                                                | MGC17330                                                                                       | HGFL gene OR HGFL gene                                                                               | 1.81 | No |
| 221757_at   | 113791                                                                | MGC17330                                                                                       | HGFL gene OR HGFL gene                                                                               | 1.82 | No |
| 202365_at   | 84747                                                                 | MGC5139                                                                                        | hypothetical protein MGC5139                                                                         | 1.69 | No |
| 211026_s_at | 11343                                                                 | MGLL                                                                                           | monoglyceride lipase OR monoglyceride lipase                                                         | 1.43 | No |
| 221559_s_at | 79003                                                                 | MIS12                                                                                          | MIS12 homolog (yeast)                                                                                | 1.44 | No |
| 204783_at   | 4291                                                                  | MLF1                                                                                           | Myeloid leukemia factor 1                                                                            | 1.86 | No |
| 204917_s_at | 4300                                                                  | MLLT3                                                                                          | myeloid/lymphoid or mixed-lineage leukemia (trithorax homolog, Drosophila); translocated to, 3       | 1.36 | No |
| 203414_at   | 23531                                                                 | MMD                                                                                            | monocyte to macrophage differentiation-associated                                                    | 1.99 | No |
| 203878_s_at | 4320                                                                  | MMP11                                                                                          | matrix metalloproteinase 11 (stromelysin 3)                                                          | 1.74 | No |
| 203936_s_at | 4318                                                                  | MMP9                                                                                           | matrix metalloproteinase 9 (gelatinase B, 92kDa type IV collagenase)                                 | 1.33 | No |
| 204206_at   | 4335                                                                  | MNT                                                                                            | MAX binding protein                                                                                  | 1.33 | No |
| 212508_at   | 64112                                                                 | MOAP1                                                                                          | modulator of apoptosis 1                                                                             | 1.61 | No |
| 202519_at   | 22877                                                                 | MONDOA                                                                                         | MondoA                                                                                               | 1.75 | No |
| 210212_x_at | 4515                                                                  | MTCPI1                                                                                         | mature T-cell proliferation 1                                                                        | 1.28 | No |
| 220346_at   | 441024                                                                | MTHFD2L                                                                                        | methylenetetrahydrofolate dehydrogenase (NADP+ dependent) 2-like                                     | 1.40 | No |
| 202364_at   | 4601                                                                  | MXI1                                                                                           | MAX interactor 1 OR MAX interactor 1                                                                 | 1.65 | No |

|             |                  |                       |                                                                                               |      |    |
|-------------|------------------|-----------------------|-----------------------------------------------------------------------------------------------|------|----|
| 213906_at   | 4603             | MYBL1                 | v-myb myeloblastosis viral oncogene homolog (avian)-like 1                                    | 1.75 | No |
| 201058_s_at | 10398            | MYL9                  | myosin, light polypeptide 9, regulatory                                                       | 2.57 | No |
| 219173_at   | 80022            | MYO15B                | myosin XVb pseudogene                                                                         | 1.79 | No |
| 59375_at    | 80022            | MYO15B                | myosin XVb pseudogene                                                                         | 1.82 | No |
| 212462_at   | 23522            | MYST4                 | MYST histone acetyltransferase (monocytic leukemia) 4                                         | 1.33 | No |
| 208752_x_at | 4673             | NAP1L1                | nucleosome assembly protein 1-like 1                                                          | 1.35 | No |
| 212967_x_at | 4673             | NAP1L1                | nucleosome assembly protein 1-like 1                                                          | 1.27 | No |
| 219368_at   | 4674             | NAP1L2                | nucleosome assembly protein 1-like 2                                                          | 2.18 | No |
| 204749_at   | 4675             | NAP1L3                | nucleosome assembly protein 1-like 3                                                          | 2.40 | No |
| 221207_s_at | 26960            | NBEA                  | neurobeachin                                                                                  | 1.64 | No |
| 219342_at   | 64921            | NBLA04196             | putative protein product of Nbla04196                                                         | 1.50 | No |
| 203315_at   | 8440             | NCK2                  | NCK adaptor protein 2                                                                         | 1.36 | No |
| 211010_s_at | 259197           | NCR3                  | natural cytotoxicity triggering receptor 3                                                    | 1.59 | No |
| 217800_s_at | 80762            | NDFIP1                | Nedd4 family interacting protein 1                                                            | 1.51 | No |
| 209300_s_at | 25977            | NECAP1                | NECAP endocytosis associated 1                                                                | 1.39 | No |
| 203413_at   | 4753             | NELL2                 | NEL-like 2 (chicken) OR NEL-like 2 (chicken)                                                  | 2.74 | No |
| 204321_at   | 4756             | NEO1                  | neogenin homolog 1 (chicken)                                                                  | 1.56 | No |
| 212847_at   | 91624            | NEXN                  | Nexlin (F actin binding protein)                                                              | 1.41 | No |
| 201146_at   | 4780             | NFE2L2                | nuclear factor (erythroid-derived 2)-like 2                                                   | 1.86 | No |
| 217963_s_at | 27018            | NGFRAP1               | nerve growth factor receptor (TNFRSF16) associated protein 1                                  | 1.54 | No |
| 217722_s_at | 51335            | NGRN                  | neugrin, neurite outgrowth associated                                                         | 1.50 | No |
| 209706_at   | 4824             | NKX3-1                | NK3 transcription factor related, locus 1 (Drosophila)                                        | 1.55 | No |
| 212739_s_at | 4833             | NME4                  | non-metastatic cells 4, protein expressed in                                                  | 1.66 | No |
| 39549_at    | 4862             | NPAS2                 | neuronal PAS domain protein 2                                                                 | 2.44 | No |
| 216321_s_at | 2908             | NR3C1                 | nuclear receptor subfamily 3, group C, member 1 (glucocorticoid receptor)                     | 1.33 | No |
| 205259_at   | 4306             | NR3C2                 | nuclear receptor subfamily 3, group C, member 2                                               | 2.62 | No |
| 204621_s_at | 4929             | NR4A2                 | nuclear receptor subfamily 4, group A, member 2                                               | 2.23 | No |
| 204622_x_at | 4929             | NR4A2                 | nuclear receptor subfamily 4, group A, member 2                                               | 1.91 | No |
| 216248_s_at | 4929             | NR4A2                 | nuclear receptor subfamily 4, group A, member 2                                               | 1.93 | No |
| 209959_at   | 8013             | NR4A3                 | nuclear receptor subfamily 4, group A, member 3                                               | 2.98 | No |
| 204105_s_at | 4897             | NRCAM                 | neuronal cell adhesion molecule                                                               | 2.27 | No |
| 204081_at   | 4900             | NRGN                  | neurogranin (protein kinase C substrate, RC3)                                                 | 2.58 | No |
| 202599_s_at | 8204             | NRIP1                 | nuclear receptor interacting protein 1                                                        | 2.95 | No |
| 202600_s_at | 8204             | NRIP1                 | nuclear receptor interacting protein 1                                                        | 2.05 | No |
| 203939_at   | 4907             | NT5E                  | 5-nucleotidase, ecto (CD73)                                                                   | 2.19 | No |
| 214251_s_at | 4926             | NUMA1                 | nuclear mitotic apparatus protein 1                                                           | 1.52 | No |
| 218708_at   | 29107            | NXT1                  | NTF2-like export factor 1                                                                     | 1.45 | No |
| 214945_at   | 285596 OR 389347 | NY-REN-7 OR LOC389347 | NY-REN-7 antigen OR similar to KIAA0752 protein                                               | 3.03 | No |
| 201599_at   | 4942             | OAT                   | ornithine aminotransferase (gyrate atrophy)                                                   | 1.36 | No |
| 219100_at   | 79991            | OBFC1                 | oligonucleotide/oligosaccharide-binding fold containing 1                                     | 1.66 | No |
| 214637_at   | 5008             | OSM                   | osteonectin M                                                                                 | 1.72 | No |
| 208113_x_at | 5042             | PABPC3                | poly(A) binding protein, cytoplasmic 3 OR poly(A) binding protein, cytoplasmic 3              | 1.46 | No |
| 201064_s_at | 8761             | PABPC4                | poly(A) binding protein, cytoplasmic 4 (inducible form)                                       | 1.46 | No |
| 221751_at   | 79646            | PANK3                 | Solute carrier family 2 (facilitated glucose transporter), member 3 pseudogene 1              | 1.36 | No |
| 219033_at   | 79668            | PARP8                 | poly (ADP-ribose) polymerase family, member 8                                                 | 1.45 | No |
| 213534_s_at | 23178            | PASK                  | PAS domain containing serine/threonine kinase                                                 | 1.75 | No |
| 213263_s_at | 5094             | PCBP2                 | Poly(rC) binding protein 2                                                                    | 1.42 | No |
| 204031_s_at | 5094             | PCBP2                 | poly(rC) binding protein 2                                                                    | 1.33 | No |
| 213173_at   | 22990            | PCNX                  | pecanex homolog (Drosophila)                                                                  | 1.50 | No |
| 213652_at   | 5125             | PCSK5                 | Proprotein convertase subtilisin/kexin type 5                                                 | 2.20 | No |
| 205559_s_at | 5125             | PCSK5                 | proprotein convertase subtilisin/kexin type 5                                                 | 2.07 | No |
| 203803_at   | 51449            | PCYOX1                | prenylcysteine oxidase 1                                                                      | 1.73 | No |
| 222326_at   | 5142             | PDE4B                 | Phosphodiesterase 4B, cAMP-specific (phosphodiesterase E4 dunce homolog, Drosophila)          | 1.74 | No |
| 203708_at   | 5142             | PDE4B                 | phosphodiesterase 4B, cAMP-specific (phosphodiesterase E4 dunce homolog, Drosophila)          | 2.02 | No |
| 211302_s_at | 5142             | PDE4B                 | phosphodiesterase 4B, cAMP-specific (phosphodiesterase E4 dunce homolog, Drosophila)          | 2.13 | No |
| 213388_at   | 9659             | PDE4DIP               | phosphodiesterase 4D interacting protein (myomegalin)                                         | 1.48 | No |
| 212521_s_at | 5151             | PDE8A                 | phosphodiesterase 8A                                                                          | 1.46 | No |
| 206686_at   | 5163             | PDK1                  | pyruvate dehydrogenase kinase, isoenzyme 1                                                    | 2.49 | No |
| 218319_at   | 57162            | PELL1                 | pellino homolog 1 (Drosophila)                                                                | 1.62 | No |
| 219132_at   | 57161            | PELL2                 | pellino homolog 2 (Drosophila)                                                                | 1.88 | No |
| 202861_at   | 5187             | PER1                  | period homolog 1 (Drosophila)                                                                 | 1.71 | No |
| 36829_at    | 5187             | PER1                  | period homolog 1 (Drosophila)                                                                 | 1.54 | No |
| 205251_at   | 8864             | PER2                  | period homolog 2 (Drosophila)                                                                 | 1.38 | No |
| 217744_s_at | 64065            | PERP                  | PERP, TP53 apoptosis effector                                                                 | 1.49 | No |
| 201707_at   | 5824             | PEX19                 | peroxisomal biogenesis factor 19                                                              | 1.38 | No |
| 206390_x_at | 5196             | PF4                   | platelet factor 4 (chemokine (C-X-C motif) ligand 4)                                          | 2.40 | No |
| 207815_at   | 5197             | PF4V1                 | platelet factor 4 variant 1                                                                   | 3.92 | No |
| 202259_s_at | 10443            | PFAAP5                | phosphonofornate immuno-associated protein 5                                                  | 1.44 | No |
| 207132_x_at | 5204             | PFDN5                 | prefoldin 5                                                                                   | 1.40 | No |
| 210908_s_at | 5204             | PFDN5                 | prefoldin 5                                                                                   | 1.33 | No |
| 202464_s_at | 5209             | PFKFB3                | 6-phosphofructo-2-kinase/fructose-2,6-bisphosphatase 3                                        | 1.68 | No |
| 204992_s_at | 5217             | PFN2                  | profilin 2                                                                                    | 1.88 | No |
| 208454_s_at | 10404            | PGCP                  | plasma glutamate carboxypeptidase                                                             | 2.50 | No |
| 203501_at   | 10404            | PGCP                  | plasma glutamate carboxypeptidase                                                             | 1.72 | No |
| 201701_s_at | 10424            | PGRMC2                | progesterone receptor membrane component 2                                                    | 1.51 | No |
| 213227_at   | 10424            | PGRMC2                | progesterone receptor membrane component 2                                                    | 1.62 | No |
| 218517_at   | 79960            | PHF17                 | PHD finger protein 17                                                                         | 1.44 | No |
| 209803_s_at | 7262             | PHLDA2                | pleckstrin homology-like domain, family A, member 2                                           | 1.90 | No |
| 205281_s_at | 5277             | PIGA                  | phosphatidylinositol glycan, class A (paroxysmal nocturnal hemoglobinuria) OR phosphatidylin  | 1.38 | No |
| 212688_at   | 5291             | PIK3CB                | phosphoinositide-3-kinase, catalytic, beta polypeptide                                        | 1.32 | No |
| 213408_s_at | 220686 OR 5297   | PIK4CA OR LOC220686   | phosphatidylinositol 4-kinase, catalytic, alpha polypeptide OR hypothetical protein LOC220686 | 1.62 | No |
| 213111_at   | 200576           | PIP5K3                | phosphatidylinositol-3-phosphate/phosphatidylinositol 5-kinase, type III                      | 1.44 | No |
| 212628_at   | 5586             | PKN2                  | Protein kinase N2                                                                             | 1.40 | No |
| 201927_s_at | 8502             | PKP4                  | plakophilin 4                                                                                 | 1.61 | No |
| 213222_at   | 23236            | PLCB1                 | phospholipase C, beta 1 (phosphoinositide-specific)                                           | 1.73 | No |
| 205934_at   | 5334             | PLCL1                 | phospholipase C-like 1                                                                        | 1.83 | No |
| 213309_at   | 23228            | PLCL2                 | phospholipase C-like 2                                                                        | 1.34 | No |
| 216218_s_at | 23228            | PLCL2                 | phospholipase C-like 2                                                                        | 1.47 | No |
| 220952_s_at | 54477            | PLEKHA5               | pleckstrin homology domain containing, family A member 5                                      | 1.95 | No |
| 209504_s_at | 58473            | PLEKHB1               | pleckstrin homology domain containing, family B (evectins) member 1                           | 1.84 | No |
| 201939_at   | 10769            | PLK2                  | polo-like kinase 2 (Drosophila)                                                               | 2.46 | No |
| 204958_at   | 1263             | PLK3                  | polo-like kinase 3 (Drosophila)                                                               | 1.85 | No |
| 201136_at   | 5355             | PLP2                  | proteolipid protein 2 (colonic epithelium-enriched)                                           | 1.70 | No |
| 214081_at   | 57125            | PLXDC1                | plexin domain containing 1                                                                    | 1.55 | No |
| 219700_at   | 57125            | PLXDC1                | plexin domain containing 1                                                                    | 1.91 | No |
| 218224_at   | 9240             | PNMA1                 | paraneoplastic antigen MA1                                                                    | 1.55 | No |
| 212036_s_at | 5411             | PNN                   | pinin, desmosome associated protein                                                           | 1.31 | No |
| 218229_s_at | 57645            | POGK                  | pogo transposable element with KRAB domain                                                    | 1.34 | No |
| 219317_at   | 11201            | POLI                  | polymerase (DNA directed) iota                                                                | 1.47 | No |
| 205878_at   | 5463             | POU6F1                | POU domain, class 6, transcription factor 1                                                   | 1.58 | No |
| 214146_s_at | 5473             | PPBP                  | pro-platelet basic protein (chemokine (C-X-C motif) ligand 7)                                 | 2.58 | No |
| 200661_at   | 5476             | PPGB                  | protective protein for beta-galactosidase (galactosialidosis)                                 | 1.62 | No |
| 218273_s_at | 54704            | PPM2C                 | protein phosphatase 2C, magnesium-dependent, catalytic subunit                                | 1.61 | No |
| 202165_at   | 5504             | PPP1R2                | protein phosphatase 1, regulatory (inhibitor) subunit 2                                       | 1.49 | No |
| 202166_s_at | 5504             | PPP1R2                | protein phosphatase 1, regulatory (inhibitor) subunit 2                                       | 1.44 | No |
| 200975_at   | 5538             | PPT1                  | palmitoyl-protein thioesterase 1 (ceroid-lipofuscinosis, neuronal 1, infantile)               | 1.41 | No |
| 218997_at   | 64425            | PRAF1                 | polymerase (RNA) I associated factor 1                                                        | 1.39 | No |
| 49485_at    | 11108            | PRDM4                 | PR domain containing 4                                                                        | 1.38 | No |
| 203680_at   | 5577             | PRKAR2B               | protein kinase, cAMP-dependent, regulatory, type II, beta                                     | 3.58 | No |
| 213093_at   | 5578             | PRKCA                 | protein kinase C, alpha                                                                       | 1.83 | No |
| 211084_x_at | 23683            | PRKD3                 | protein kinase D3 OR protein kinase D3                                                        | 1.76 | No |
| 218236_s_at | 23683            | PRKD3                 | protein kinase D3                                                                             | 1.58 | No |

|             |                                                |                                |                                                                                                    |      |    |
|-------------|------------------------------------------------|--------------------------------|----------------------------------------------------------------------------------------------------|------|----|
| 209139_s_at | 8575                                           | PRKRA                          | protein kinase, interferon-inducible double stranded RNA dependent activator                       | 1.42 | No |
| 209323_at   | 5612                                           | PRKRIR                         | protein-kinase, interferon-inducible double stranded RNA dependent inhibitor, repressor of (P5     | 1.28 | No |
| 201300_s_at | 5621                                           | PRNP                           | prion protein (p27-30) (Creutzfeld-Jakob disease, Gerstmann-Strausler-Scheinker syndrome, f        | 1.59 | No |
| 215707_s_at | 5621                                           | PRNP                           | prion protein (p27-30) (Creutzfeld-Jakob disease, Gerstmann-Strausler-Scheinker syndrome, f        | 1.54 | No |
| 217682_at   | 29035                                          | PROO149                        | PROO149 protein                                                                                    | 1.52 | No |
| 207808_s_at | 5627                                           | PROS1                          | protein S (alpha)                                                                                  | 2.81 | No |
| 200000_s_at | 10594                                          | PRPF8                          | PRPF8 pre-mRNA processing factor 8 homolog (yeast) OR PRPF8 pre-mRNA processing factor ;           | 1.36 | No |
| 209606_at   | 9595                                           | PSCDBP                         | pleckstrin homology, Sec7 and coiled-coil domains, binding protein OR pleckstrin homology, S       | 1.41 | No |
| 209815_at   | 5727                                           | PTCH                           | patched homolog (Drosophila)                                                                       | 1.74 | No |
| 204896_s_at | 5734                                           | PTGER4                         | prostaglandin E receptor 4 (subtype EP4)                                                           | 2.09 | No |
| 215813_s_at | 5742                                           | PTGS1                          | prostaglandin-endoperoxide synthase 1 (prostaglandin G/H synthase and cyclooxygenase)              | 1.79 | No |
| 205128_x_at | 5742                                           | PTGS1                          | prostaglandin-endoperoxide synthase 1 (prostaglandin G/H synthase and cyclooxygenase)              | 1.68 | No |
| 37549_g_at  | 27241                                          | PTH1B                          | parathyroid hormone-responsive B1                                                                  | 1.44 | No |
| 201745_at   | 5756                                           | PTK9                           | PTK9 protein tyrosine kinase 9                                                                     | 1.50 | No |
| 200730_s_at | 7803                                           | PTP4A1                         | protein tyrosine phosphatase type IVA, member 1                                                    | 1.92 | No |
| 200731_s_at | 7803                                           | PTP4A1                         | protein tyrosine phosphatase type IVA, member 1                                                    | 1.75 | No |
| 200732_s_at | 7803                                           | PTP4A1                         | protein tyrosine phosphatase type IVA, member 1                                                    | 1.70 | No |
| 200733_s_at | 7803                                           | PTP4A1                         | protein tyrosine phosphatase type IVA, member 1                                                    | 1.59 | No |
| 212640_at   | 201562                                         | PTPLB                          | protein tyrosine phosphatase-like (proline instead of catalytic arginine), member b                | 1.48 | No |
| 213799_s_at | 5786                                           | PTPRA                          | protein tyrosine phosphatase, receptor type, A                                                     | 1.47 | No |
| 203329_at   | 5797                                           | PTPRM                          | protein tyrosine phosphatase, receptor type, M                                                     | 1.85 | No |
| 211600_at   | 5800                                           | PTPRO                          | protein tyrosine phosphatase, receptor type, O OR protein tyrosine phosphatase, receptor type      | 2.33 | No |
| 209694_at   | 5805                                           | PTS                            | 6-pyruvoyltetrahydropterin synthase                                                                | 1.38 | No |
| 202990_at   | 5836                                           | PYGL                           | phosphorylase, glycogen; liver (Hers disease, glycogen storage disease type VI)                    | 1.60 | No |
| 207791_s_at | 5861                                           | RAB1A                          | RAB1A, member RAS oncogene family                                                                  | 1.46 | No |
| 208732_at   | 5862                                           | RAB2                           | RAB2, member RAS oncogene family                                                                   | 1.30 | No |
| 212561_at   | 23258                                          | RAB6IP1                        | RAB6 interacting protein 1                                                                         | 1.64 | No |
| 212842_x_at | 84220                                          | RANBP2L1                       | RAN binding protein 2-like 1                                                                       | 1.53 | No |
| 213019_at   | 26953                                          | RANBP6                         | RAN binding protein 6                                                                              | 1.62 | No |
| 214488_at   | 5912                                           | RAP2B                          | RAP2B, member of RAS oncogene family                                                               | 1.99 | No |
| 203097_s_at | 9693                                           | RAPGEF2                        | Rap guanine nucleotide exchange factor (GEF) 2                                                     | 1.40 | No |
| 203749_s_at | 5914                                           | RARA                           | retinoic acid receptor, alpha                                                                      | 1.69 | No |
| 210621_s_at | 5921                                           | RASA1                          | RAS p21 protein activator (GTPase activating protein) 1                                            | 1.38 | No |
| 206220_s_at | 22821                                          | RASA3                          | RAS p21 protein activator 3                                                                        | 1.60 | No |
| 214369_s_at | 10235                                          | RASGRP2                        | RAS guanyl releasing protein 2 (calcium and DAG-regulated)                                         | 1.44 | No |
| 212870_at   | 283349                                         | RASSF3                         | Ras association (RalGDS/AF-6) domain family 3                                                      | 1.61 | No |
| 209868_s_at | 5937                                           | RBMS1                          | RNA binding motif, single stranded interacting protein 1                                           | 1.33 | No |
| 212743_at   | 25898                                          | RCHY1                          | ring finger and CHY zinc finger domain containing 1                                                | 1.83 | No |
| 205407_at   | 8434                                           | RECK                           | reversion-inducing-cysteine-rich protein with kazal motifs                                         | 1.99 | No |
| 218723_s_at | 28984                                          | RGC32                          | response gene to complement 32                                                                     | 2.46 | No |
| 204319_s_at | 6001                                           | RG510                          | regulator of G-protein signalling 10                                                               | 1.37 | No |
| 202388_at   | 5997                                           | RG52                           | regulator of G-protein signalling 2, 24kDa                                                         | 1.38 | No |
| 204951_at   | 399                                            | RHOH                           | ras homolog gene family, member H                                                                  | 1.58 | No |
| 211515_s_at | 25778                                          | RIPK5                          | receptor interacting protein kinase 5                                                              | 1.39 | No |
| 202636_at   | 7844                                           | RNF103                         | ring finger protein 103                                                                            | 1.44 | No |
| 208924_at   | 26994                                          | RNF11                          | ring finger protein 11                                                                             | 1.59 | No |
| 218761_at   | 54778                                          | RNF111                         | ring finger protein 111                                                                            | 1.35 | No |
| 217865_at   | 55819                                          | RNF130                         | ring finger protein 130                                                                            | 3.03 | No |
| 218738_s_at | 51444                                          | RNF138                         | ring finger protein 138                                                                            | 1.75 | No |
| 209510_at   | 11236                                          | RNF139                         | ring finger protein 139                                                                            | 1.25 | No |
| 204040_at   | 9781                                           | RNF144                         | ring finger protein 144                                                                            | 1.72 | No |
| 202684_s_at | 8731                                           | RNMT                           | RNA (guanine-7-) methyltransferase                                                                 | 1.64 | No |
| 208720_s_at | 9584                                           | RNPC2                          | RNA-binding region (RNP1, RRM) containing 2                                                        | 1.42 | No |
| 217379_at   | 6134                                           | RPL10                          | ribosomal protein L10                                                                              | 1.81 | No |
| 221989_at   | 6134                                           | RPL10                          | ribosomal protein L10                                                                              | 1.49 | No |
| 217559_at   | 140801                                         | RPL10L                         | ribosomal protein L10-like                                                                         | 1.65 | No |
| 217266_at   | 136321 OR 402694 OR 6138                       | RPL15                          | ribosomal protein L15 OR similar to ribosomal protein L15 OR similar to ribosomal protein L15      | 1.45 | No |
| 221726_at   | 6146                                           | RPL22                          | ribosomal protein L22                                                                              | 1.55 | No |
| 215224_at   | 9349                                           | RPL23                          | ribosomal protein L23                                                                              | 1.96 | No |
| 221634_at   | 118433                                         | RPL23AP7                       | ribosomal protein L23a pseudogene 7                                                                | 2.18 | No |
| 222229_x_at | 392501 OR 400055 OR 441073 OR 44153R LOC392501 | OR LOC400055 OR LC             | ribosomal protein L26 OR similar to 60S ribosomal protein L26 OR similar to 60S ribosomal pr       | 1.31 | No |
| 216570_x_at | 284064 OR 389655 OR 391738 OR 40191R LOC284064 | OR LOC389655 OR LC             | ribosomal protein L29 OR similar to 60S ribosomal protein L29 (Cell surface heparin binding pr     | 1.34 | No |
| 213459_at   | 6168                                           | RPL37A                         | ribosomal protein L37a                                                                             | 1.56 | No |
| 200937_s_at | 6125                                           | RPL5                           | ribosomal protein L5                                                                               | 1.29 | No |
| 213080_x_at | 6125                                           | RPL5                           | ribosomal protein L5                                                                               | 1.33 | No |
| 200936_at   | 6132                                           | RPL8                           | ribosomal protein L8                                                                               | 1.38 | No |
| 217336_at   | 388885 OR 389127 OR 390842 OR 40181R LOC388885 | OR LOC389127 OR LC             | ribosomal protein S10 OR similar to 40S ribosomal protein S10 OR hypothetical LOC388885 C          | 1.42 | No |
| 216505_x_at | 388885 OR 6204                                 | RPS10                          | ribosomal protein S10 OR hypothetical LOC388885                                                    | 1.34 | No |
| 217466_x_at | 286444 OR 400963 OR 440589 OR 6187             | : LOC148430 OR LOC286444 OR LO | ribosomal protein S2 OR similar to ribosomal protein S2; 40S ribosomal protein S2 OR similar       | 1.51 | No |
| 208903_at   | 6234                                           | RPS28                          | Ribosomal protein S28                                                                              | 1.34 | No |
| 216380_x_at | 6234                                           | RPS28                          | ribosomal protein S28                                                                              | 1.54 | No |
| 203704_s_at | 6239                                           | RREB1                          | ras responsive element binding protein 1                                                           | 1.30 | No |
| 218307_at   | 55316                                          | RSAD1                          | radical S-adenosyl methionine domain containing 1                                                  | 1.34 | No |
| 213694_at   | 54665                                          | RSBN1                          | round spermatid basic protein 1                                                                    | 1.64 | No |
| 212018_s_at | 26156                                          | RSL1D1                         | ribosomal L1 domain containing 1                                                                   | 1.59 | No |
| 210365_at   | 861                                            | RUNX1                          | runt-related transcription factor 1 (acute myeloid leukemia 1; aml1 oncogene)                      | 1.40 | No |
| 201846_s_at | 23429                                          | RYBP                           | RING1 and YY1 binding protein                                                                      | 1.39 | No |
| 216976_s_at | 6259                                           | RYK                            | RYK receptor-like tyrosine kinase                                                                  | 1.43 | No |
| 214172_x_at | 6259                                           | RYK                            | RYK receptor-like tyrosine kinase                                                                  | 1.41 | No |
| 209686_at   | 6285                                           | S100B                          | S100 calcium binding protein, beta (neural)                                                        | 3.12 | No |
| 211423_s_at | 6309                                           | SC5DL                          | sterol-C5-desaturase (ERG3 delta-5-desaturase homolog, fungal)-like                                | 1.90 | No |
| 218793_s_at | 6322                                           | SCML1                          | sex comb on midleg-like 1 (Drosophila)                                                             | 2.84 | No |
| 201462_at   | 9805                                           | SCRN1                          | secernin 1                                                                                         | 1.68 | No |
| 218711_s_at | 8436                                           | SDPR                           | serum deprivation response (phosphatidylserine binding protein)                                    | 2.05 | No |
| 201916_s_at | 11231                                          | SEC63                          | SEC63-like (S. cerevisiae)                                                                         | 1.31 | No |
| 206049_at   | 6403                                           | SELP                           | selectin P (granule membrane protein 140kDa, antigen CD62)                                         | 1.59 | No |
| 46665_at    | 54910                                          | SEMA4C                         | sema domain, immunoglobulin domain (Ig), transmembrane domain (TM) and short cytoplasm             | 1.80 | No |
| 210124_x_at | 10505                                          | SEMA4F                         | sema domain, immunoglobulin domain (Ig), transmembrane domain (TM) and short cytoplasm             | 1.38 | No |
| 215113_s_at | 26168                                          | SENP3                          | SUMO1/sentrin/SMT3 specific peptidase 3                                                            | 1.40 | No |
| 214790_at   | 26054                                          | SENP6                          | SUMO1/sentrin specific peptidase 6                                                                 | 1.58 | No |
| 208671_at   | 57515                                          | SERINC1                        | serine incorporator 1                                                                              | 1.32 | No |
| 200970_s_at | 27230                                          | SERP1                          | stress-associated endoplasmic reticulum protein 1                                                  | 1.37 | No |
| 212190_at   | 5270                                           | SERPINE2                       | serpin peptidase inhibitor, clade E (nexin, plasminogen activator inhibitor type 1), member 2      | 1.62 | No |
| 202657_s_at | 9792                                           | SERTAD2                        | SERTA domain containing 2                                                                          | 1.54 | No |
| 218346_s_at | 27244                                          | SESN1                          | sestrin 1                                                                                          | 1.61 | No |
| 210077_s_at | 6430                                           | SFRS5                          | splicing factor, arginine/serine-rich 5                                                            | 1.54 | No |
| 201739_at   | 6446                                           | SGK                            | serum/glucocorticoid regulated kinase                                                              | 2.65 | No |
| 202981_x_at | 6477                                           | SIAH1                          | seven in absentia homolog 1 (Drosophila)                                                           | 1.52 | No |
| 218878_s_at | 23411                                          | SIRT1                          | sirtuin (silent mating type information regulation 2 homolog) 1 (S. cerevisiae)                    | 1.38 | No |
| 217591_at   | 6498                                           | SKIL                           | SKI-like                                                                                           | 1.87 | No |
| 200719_at   | 6500                                           | SKP1A                          | S-phase kinase-associated protein 1A (p19A)                                                        | 1.58 | No |
| 219915_s_at | 117247                                         | SLC16A10                       | solute carrier family 16 (monocarboxylic acid transporters), member 10                             | 1.84 | No |
| 207057_at   | 9194                                           | SLC16A7                        | solute carrier family 16 (monocarboxylic acid transporters), member 7                              | 1.43 | No |
| 213549_at   | 6571                                           | SLC18A2                        | Solute carrier family 18 (vesicular monoamine), member 2                                           | 1.84 | No |
| 209681_at   | 10560                                          | SLC19A2                        | solute carrier family 19 (thiamine transporter), member 2                                          | 1.75 | No |
| 57588_at    | 57419                                          | SLC24A3                        | solute carrier family 24 (sodium/potassium/calcium exchanger), member 3                            | 1.73 | No |
| 201917_s_at | 55186                                          | SLC25A36                       | solute carrier family 25, member 36                                                                | 1.37 | No |
| 201919_at   | 55186                                          | SLC25A36                       | Solute carrier family 25, member 36                                                                | 1.32 | No |
| 202497_x_at | 6515                                           | SLC2A3                         | solute carrier family 2 (facilitated glucose transporter), member 3                                | 2.04 | No |
| 202498_s_at | 6515                                           | SLC2A3                         | solute carrier family 2 (facilitated glucose transporter), member 3                                | 1.71 | No |
| 202499_s_at | 6515                                           | SLC2A3                         | solute carrier family 2 (facilitated glucose transporter), member 3                                | 1.69 | No |
| 216236_s_at | 144195 OR 6515                                 | SLC2A3 OR SLC2A14              | solute carrier family 2 (facilitated glucose transporter), member 3 OR solute carrier family 2 (fa | 2.17 | No |

|             |                |                   |                                                                                                     |      |    |
|-------------|----------------|-------------------|-----------------------------------------------------------------------------------------------------|------|----|
| 222088_s_at | 144195 OR 6515 | SLC2A3 OR SLC2A14 | solute carrier family 2 (facilitated glucose transporter), member 3 OR solute carrier family 2 (fa  | 1.58 | No |
| 209711_at   | 23169          | SLC35D1           | solute carrier family 35 (UDP-glucuronic acid/UDP-N-acetylglucosamine dual transporter), m          | 1.33 | No |
| 218041_x_at | 54407          | SLC38A2           | solute carrier family 38, member 2                                                                  | 1.40 | No |
| 220924_s_at | 54407          | SLC38A2           | solute carrier family 38, member 2                                                                  | 1.39 | No |
| 209267_s_at | 64116          | SLC39A8           | solute carrier family 39 (zinc transporter), member 8                                               | 1.43 | No |
| 203908_at   | 8671           | SLC4A4            | solute carrier family 4, sodium bicarbonate cotransporter, member 4                                 | 1.73 | No |
| 216604_s_at | 23428          | SLC7A8            | Solute carrier family 7 (cationic amino acid transporter, y+ system), member 8                      | 1.71 | No |
| 202526_at   | 4089           | SMAD4             | SMAD, mothers against DPP homolog 4 (Drosophila)                                                    | 1.43 | No |
| 204790_at   | 4092           | SMAD7             | SMAD, mothers against DPP homolog 7 (Drosophila)                                                    | 2.77 | No |
| 205596_s_at | 64750          | SMURF2            | SMAD specific E3 ubiquitin protein ligase 2                                                         | 1.38 | No |
| 212922_s_at | 56950          | SMYD2             | SET and MYND domain containing 2                                                                    | 1.23 | No |
| 217616_at   | 150094         | SNF1LK            | SNF1-like kinase                                                                                    | 2.26 | No |
| 208078_s_at | 150094         | SNF1LK            | SNF1-like kinase OR SNF1-like kinase                                                                | 1.87 | No |
| 218032_at   | 8303           | SNN               | stannin                                                                                             | 2.43 | No |
| 209481_at   | 54861          | SNRK              | SNF related kinase                                                                                  | 1.42 | No |
| 221974_at   | 6638           | SNRPN             | Small nuclear ribonucleoprotein polypeptide N                                                       | 1.53 | No |
| 206042_x_at | 6638 OR 8926   | SNRPN OR SNURF    | small nuclear ribonucleoprotein polypeptide N OR SNRPN upstream reading frame                       | 1.49 | No |
| 213364_s_at | 6642           | SNX1              | sorting nexin 1                                                                                     | 1.53 | No |
| 203372_s_at | 8835           | SOCS2             | suppressor of cytokine signaling 2                                                                  | 1.63 | No |
| 206360_s_at | 9021           | SOCS3             | suppressor of cytokine signaling 3                                                                  | 1.60 | No |
| 206359_at   | 9021           | SOCS3             | suppressor of cytokine signaling 3                                                                  | 1.62 | No |
| 209647_s_at | 9655           | SOCS5             | suppressor of cytokine signaling 5                                                                  | 1.75 | No |
| 209648_x_at | 9655           | SOCS5             | suppressor of cytokine signaling 5                                                                  | 2.31 | No |
| 208127_s_at | 9655           | SOCS5             | suppressor of cytokine signaling 5                                                                  | 2.07 | No |
| 213538_at   | 6651           | SON               | SON DNA binding protein                                                                             | 1.33 | No |
| 203509_at   | 6653           | SORL1             | sortilin-related receptor, L(DLR class) A repeats-containing                                        | 1.63 | No |
| 201416_at   | 6659           | SOX4              | SRY (sex determining region Y)-box 4                                                                | 2.31 | No |
| 201417_at   | 6659           | SOX4              | SRY (sex determining region Y)-box 4                                                                | 4.15 | No |
| 200665_s_at | 6678           | SPARC             | secreted protein, acidic, cysteine-rich (osteonectin) OR secreted protein, acidic, cysteine-rich (i | 2.62 | No |
| 212526_at   | 23111          | SPG20             | spastic paraplegia 20, spartin (Troyer syndrome)                                                    | 2.10 | No |
| 206310_at   | 6691           | SPINK2            | serine peptidase inhibitor, Kazal type 2 (acrosin-trypsin inhibitor)                                | 3.01 | No |
| 202524_s_at | 9806           | SPOCK2            | sparc/osteonectin, cwcv and kazal-like domains proteoglycan (testican) 2                            | 1.69 | No |
| 215918_s_at | 6711           | SPTBN1            | spectrin, beta, non-erythrocytic 1                                                                  | 1.61 | No |
| 213152_s_at | 10929          | SRP46             | Splicing factor, arginine/serine-rich, 46kD                                                         | 1.42 | No |
| 210829_s_at | 23635          | SBBP2             | single-stranded DNA binding protein 2                                                               | 2.69 | No |
| 203787_at   | 23635          | SBBP2             | single-stranded DNA binding protein 2                                                               | 1.94 | No |
| 207040_s_at | 6767           | ST13              | suppression of tumorigenicity 13 (colon carcinoma) (Hsp70 interacting protein)                      | 1.33 | No |
| 208666_s_at | 6767           | ST13              | suppression of tumorigenicity 13 (colon carcinoma) (Hsp70 interacting protein)                      | 1.37 | No |
| 215874_at   | 6482           | ST3GAL1           | ST3 beta-galactoside alpha-2,3-sialyltransferase 1                                                  | 1.74 | No |
| 203544_s_at | 8027           | STAM              | signal transducing adaptor molecule (SH3 domain and ITAM motif) 1                                   | 1.41 | No |
| 202557_at   | 6782           | STCH              | stress 70 protein chaperone, microsome-associated, 60kDa                                            | 1.38 | No |
| 202558_s_at | 6782           | STCH              | stress 70 protein chaperone, microsome-associated, 60kDa                                            | 1.50 | No |
| 205214_at   | 9262           | STK17B            | serine/threonine kinase 17b (apoptosis-inducing)                                                    | 1.72 | No |
| 217503_at   | 9262           | STK17B            | <i>serine/threonine kinase 17b (apoptosis-inducing)</i>                                             | 1.62 | No |
| 215772_x_at | 8801           | SUCLG2            | succinate-CoA ligase, GDP-forming, beta subunit                                                     | 1.33 | No |
| 209362_at   | 9412           | SURB7             | SRB7 suppressor of RNA polymerase B homolog (yeast)                                                 | 1.40 | No |
| 209363_s_at | 9412           | SURB7             | SRB7 suppressor of RNA polymerase B homolog (yeast)                                                 | 1.34 | No |
| 202565_s_at | 6840           | SVIL              | supervillin                                                                                         | 1.74 | No |
| 217833_at   | 10492          | SYNCRIP           | synaptotagmin binding, cytoplasmic RNA interacting protein                                          | 1.37 | No |
| 212828_at   | 8871           | SYNJ2             | synaptojanin 2                                                                                      | 1.42 | No |
| 201259_s_at | 6856           | SYPL1             | synaptophysin-like 1                                                                                | 1.66 | No |
| 201260_s_at | 6856           | SYPL1             | synaptophysin-like 1                                                                                | 1.69 | No |
| 201023_at   | 6879           | TAF7              | TAF7 RNA polymerase II, TATA box binding protein (TBP)-associated factor, 55kDa                     | 1.35 | No |
| 206283_s_at | 6886           | TAL1              | T-cell acute lymphocytic leukemia 1                                                                 | 2.01 | No |
| 221428_s_at | 79718          | TBL1XR1           | transducin (beta)-like 1X-linked receptor 1 OR transducin (beta)-like 1X-linked receptor 1          | 1.54 | No |
| 336_at      | 6915           | TBXA2R            | thromboxane A2 receptor                                                                             | 1.45 | No |
| 202371_at   | 79921          | TCEAL4            | transcription elongation factor A (SII)-like 4                                                      | 2.20 | No |
| 205254_x_at | 6932           | TCF7              | transcription factor 7 (T-cell specific, HMG-box)                                                   | 1.70 | No |
| 216511_s_at | 6934           | TCF7L2            | transcription factor 7-like 2 (T-cell specific, HMG-box)                                            | 1.73 | No |
| 212762_s_at | 6934           | TCF7L2            | transcription factor 7-like 2 (T-cell specific, HMG-box)                                            | 1.58 | No |
| 210875_s_at | 6935           | TCF8              | transcription factor 8 (represses interleukin 2 expression)                                         | 2.37 | No |
| 212764_at   | 6935           | TCF8              | <i>transcription factor 8 (represses interleukin 2 expression)</i>                                  | 1.67 | No |
| 203303_at   | 6990           | TCTE1L            | t-complex-associated-testis-expressed 1-like                                                        | 1.53 | No |
| 208944_at   | 7048           | TGFBR2            | transforming growth factor, beta receptor II (70/80kDa)                                             | 1.60 | No |
| 203313_s_at | 7050           | TGIF              | TGFB-induced factor (TALE family homeobox)                                                          | 2.23 | No |
| 212910_at   | 57215          | THAP11            | THAP domain containing 11                                                                           | 1.32 | No |
| 201108_s_at | 7057           | THBS1             | thrombospondin 1                                                                                    | 1.79 | No |
| 201110_s_at | 7057           | THBS1             | thrombospondin 1                                                                                    | 3.87 | No |
| 204760_s_at | 7067 OR 9572   | THRA OR NR1D1     | thyroid hormone receptor, alpha (erythroblastic leukemia viral (v-erb-a) oncogene homolog, av       | 3.42 | No |
| 213025_at   | 55623          | THUMPD1           | THUMP domain containing 1                                                                           | 1.49 | No |
| 40837_at    | 7089           | TLE2              | transducin-like enhancer of split 2 (E(sp1) homolog, Drosophila)                                    | 1.76 | No |
| 208943_s_at | 7095           | TLOC1             | translocation protein 1                                                                             | 1.44 | No |
| 221702_s_at | 80213          | TM2D3             | TM2 domain containing 3 OR TM2 domain containing 3                                                  | 1.45 | No |
| 200929_at   | 10972          | TMED10            | transmembrane emp24-like trafficking protein 10 (yeast)                                             | 1.43 | No |
| 217743_s_at | 55754          | TMEM30A           | transmembrane protein 30A                                                                           | 1.35 | No |
| 213285_at   | 161291         | TMEM30B           | transmembrane protein 30B                                                                           | 1.89 | No |
| 210260_s_at | 25816          | TNFAIP8           | tumor necrosis factor, alpha-induced protein 8                                                      | 1.26 | No |
| 209295_at   | 8795           | TNFRSF10B         | tumor necrosis factor receptor superfamily, member 10b                                              | 1.39 | No |
| 219423_x_at | 8718           | TNFRSF25          | tumor necrosis factor receptor superfamily, member 25                                               | 1.47 | No |
| 207426_s_at | 7292           | TNFSF4            | tumor necrosis factor (ligand) superfamily, member 4 (tax-transcriptionally activated glycoprote    | 1.68 | No |
| 202704_at   | 10140          | TOB1              | transducer of ERBB2, 1                                                                              | 1.42 | No |
| 200662_s_at | 9804           | TOMM20            | translocase of outer mitochondrial membrane 20 homolog (yeast)                                      | 1.28 | No |
| 212773_s_at | 9804           | TOMM20            | translocase of outer mitochondrial membrane 20 homolog (yeast)                                      | 1.53 | No |
| 204071_s_at | 10210          | TOPORS            | topoisomerase I binding, arginine/serine-rich                                                       | 1.41 | No |
| 217914_at   | 53373          | TPCN1             | two pore segment channel 1                                                                          | 1.57 | No |
| 201688_s_at | 7163           | TPD52             | tumor protein D52                                                                                   | 1.42 | No |
| 201689_s_at | 7163           | TPD52             | tumor protein D52                                                                                   | 1.45 | No |
| 210986_s_at | 7168           | TPM1              | tropomyosin 1 (alpha)                                                                               | 1.92 | No |
| 204140_at   | 8460           | TPST1             | tyrosylprotein sulfotransferase 1                                                                   | 1.39 | No |
| 215275_at   | 80342          | TRAF3IP3          | TRAF3 interacting protein 3                                                                         | 1.59 | No |
| 200990_at   | 10155          | TRIM28            | tripartite motif-containing 28                                                                      | 1.42 | No |
| 217760_at   | 54765          | TRIM44            | tripartite motif-containing 44                                                                      | 1.25 | No |
| 215111_s_at | 8848           | TSC22D1           | TSC22 domain family, member 1                                                                       | 1.77 | No |
| 204094_s_at | 9819           | TSC22D2           | TSC22 domain family, member 2                                                                       | 1.83 | No |
| 207001_x_at | 1831           | TSC22D3           | TSC22 domain family, member 3                                                                       | 3.02 | No |
| 200973_s_at | 10099          | TSPAN3            | tetraspanin 3                                                                                       | 1.58 | No |
| 200972_at   | 10099          | TSPAN3            | tetraspanin 3                                                                                       | 2.05 | No |
| 221493_at   | 7259           | TSPYL1            | TSPY-like 1                                                                                         | 1.43 | No |
| 208073_x_at | 7267           | TTC3              | tetratricopeptide repeat domain 3                                                                   | 1.52 | No |
| 208662_s_at | 7267           | TTC3              | tetratricopeptide repeat domain 3                                                                   | 1.40 | No |
| 210645_s_at | 7267           | TTC3              | tetratricopeptide repeat domain 3                                                                   | 1.46 | No |
| 205652_s_at | 25809          | TTL1              | tubulin tyrosine ligase-like family, member 1                                                       | 1.44 | No |
| 212242_at   | 7277           | TUBA1             | tubulin, alpha 1 (testis specific)                                                                  | 1.43 | No |
| 207490_at   | 80086          | TUBA4             | tubulin, alpha 4                                                                                    | 1.47 | No |
| 208601_s_at | 81027          | TUBB1             | tubulin, beta 1 OR tubulin, beta 1                                                                  | 2.88 | No |
| 215739_s_at | 10426          | TUBGCP3           | tubulin, gamma complex associated protein 3                                                         | 1.57 | No |
| 201534_s_at | 5412           | UBL3              | ubiquitin-like 3                                                                                    | 1.71 | No |
| 201535_at   | 5412           | UBL3              | ubiquitin-like 3                                                                                    | 1.46 | No |
| 204062_s_at | 9706           | ULK2              | unc-51-like kinase 2 (C. elegans)                                                                   | 1.45 | No |
| 204063_s_at | 9706           | ULK2              | unc-51-like kinase 2 (C. elegans)                                                                   | 1.30 | No |
| 209066_x_at | 7381           | UQCRCB            | ubiquinol-cytochrome c reductase binding protein                                                    | 1.42 | No |
| 220370_s_at | 57602          | USP36             | ubiquitin specific peptidase 36                                                                     | 1.48 | No |

|             |                |              |                                                                                                    |      |    |
|-------------|----------------|--------------|----------------------------------------------------------------------------------------------------|------|----|
| 204761_at   | 9712           | USP6NL       | USP6 N-terminal like                                                                               | 2.08 | No |
| 219675_s_at | 80146          | UXS1         | UDP-glucuronate decarboxylase 1                                                                    | 1.54 | No |
| 218495_at   | 8409           | UXT          | ubiquitously-expressed transcript                                                                  | 1.39 | No |
| 218806_s_at | 10451          | VAV3         | vav 3 oncogene                                                                                     | 1.56 | No |
| 218807_at   | 10451          | VAV3         | vav 3 oncogene                                                                                     | 1.37 | No |
| 210512_s_at | 7422           | VEGF         | vascular endothelial growth factor                                                                 | 2.31 | No |
| 208622_s_at | 7430           | VIL2         | villin 2 (ezrin)                                                                                   | 1.61 | No |
| 205019_s_at | 7433           | VIPR1        | vasoactive intestinal peptide receptor 1                                                           | 1.91 | No |
| 217821_s_at | 51729          | WBP11        | WW domain binding protein 11                                                                       | 1.59 | No |
| 211383_s_at | 22884          | WDR37        | WD repeat domain 37                                                                                | 1.47 | No |
| 201295_s_at | 26118          | WSB1         | WD repeat and SOCS box-containing 1                                                                | 2.02 | No |
| 219077_s_at | 51741          | WWOX         | WW domain containing oxidoreductase                                                                | 1.37 | No |
| 200670_at   | 7494           | XBP1         | X-box binding protein 1                                                                            | 1.38 | No |
| 219401_at   | 64132          | XYLT2        | xylosyltransferase II                                                                              | 1.64 | No |
| 217783_s_at | 51646          | YPEL5        | yippee-like 5 (Drosophila)                                                                         | 1.46 | No |
| 218647_s_at | 79693          | YRDC         | yrdC domain containing (E.coli)                                                                    | 1.47 | No |
| 214814_at   | 91746          | YTHDC1       | YTH domain containing 1                                                                            | 1.60 | No |
| 221749_at   | 253943         | YTHDF3       | YTH domain family, member 3                                                                        | 1.36 | No |
| 210275_s_at | 7763           | ZA20D2       | zinc finger, A20 domain containing 2                                                               | 1.34 | No |
| 217741_s_at | 7763           | ZA20D2       | zinc finger, A20 domain containing 2                                                               | 1.40 | No |
| 213376_at   | 22890          | ZBTB1        | zinc finger and BTB domain containing 1                                                            | 1.62 | No |
| 219312_s_at | 65986          | ZBTB10       | zinc finger and BTB domain containing 10                                                           | 2.44 | No |
| 205383_s_at | 26137          | ZBTB20       | zinc finger and BTB domain containing 20                                                           | 1.59 | No |
| 218810_at   | 80149          | ZC3H12A      | zinc finger CCCH-type containing 12A                                                               | 1.49 | No |
| 212655_at   | 23174          | ZCCHC14      | zinc finger, CCHC domain containing 14                                                             | 1.97 | No |
| 209724_s_at | 7541           | ZFP161       | zinc finger protein 161 homolog (mouse)                                                            | 1.30 | No |
| 201531_at   | 7538           | ZFP36        | zinc finger protein 36, C3H type, homolog (mouse)                                                  | 1.62 | No |
| 211962_s_at | 677            | ZFP36L1      | zinc finger protein 36, C3H type-like 1                                                            | 1.58 | No |
| 201367_s_at | 678            | ZFP36L2      | zinc finger protein 36, C3H type-like 2                                                            | 1.91 | No |
| 207247_s_at | 7543 OR 7544   | ZFX OR ZFY   | zinc finger protein, X-linked OR zinc finger protein, Y-linked                                     | 1.60 | No |
| 203556_at   | 22882          | ZHX2         | zinc fingers and homeoboxes 2                                                                      | 1.33 | No |
| 216350_s_at | 7556           | ZNF10        | zinc finger protein 10                                                                             | 2.26 | No |
| 206240_s_at | 7695           | ZNF136       | zinc finger protein 136 (clone pHZ-20)                                                             | 1.55 | No |
| 219854_at   | 7561           | ZNF14        | zinc finger protein 14 (KOX 6)                                                                     | 1.56 | No |
| 213452_at   | 7738           | ZNF184       | zinc finger protein 184 (Kruppel-like)                                                             | 1.78 | No |
| 210281_s_at | 7750           | ZNF198       | zinc finger protein 198                                                                            | 1.46 | No |
| 218005_at   | 7570           | ZNF22        | zinc finger protein 22 (KOX 15)                                                                    | 1.38 | No |
| 207164_s_at | 10472          | ZNF238       | zinc finger protein 238                                                                            | 1.94 | No |
| 212774_at   | 10472          | ZNF238       | zinc finger protein 238                                                                            | 2.23 | No |
| 203248_at   | 7572           | ZNF24        | zinc finger protein 24 (KOX 17)                                                                    | 1.58 | No |
| 204937_s_at | 10782          | ZNF274       | zinc finger protein 274                                                                            | 1.35 | No |
| 209741_x_at | 49855          | ZNF291       | zinc finger protein 291                                                                            | 1.39 | No |
| 219765_at   | 79673          | ZNF329       | zinc finger protein 329                                                                            | 2.02 | No |
| 219228_at   | 55422          | ZNF331       | zinc finger protein 331                                                                            | 2.68 | No |
| 214714_at   | 84124          | ZNF394       | zinc finger protein 394                                                                            | 1.48 | No |
| 218149_s_at | 55893          | ZNF395       | zinc finger protein 395                                                                            | 2.00 | No |
| 205964_at   | 79088          | ZNF426       | zinc finger protein 426                                                                            | 1.76 | No |
| 222136_x_at | 7594           | ZNF43        | zinc finger protein 43 (HTF6)                                                                      | 1.51 | No |
| 206829_x_at | 80264          | ZNF430       | zinc finger protein 430                                                                            | 1.45 | No |
| 218312_s_at | 65982          | ZNF447       | zinc finger protein 447                                                                            | 1.99 | No |
| 204291_at   | 9849           | ZNF518       | zinc finger protein 518                                                                            | 1.39 | No |
| 206648_at   | 51276          | ZNF571       | zinc finger protein 571                                                                            | 1.95 | No |
| 220760_x_at | 79788          | ZNF665       | zinc finger protein 665                                                                            | 1.37 | No |
| 221645_s_at | 55769          | ZNF83        | zinc finger protein 83 (HPF1)                                                                      | 1.97 | No |
| 204453_at   | 7637           | ZNF84        | zinc finger protein 84 (HPF2)                                                                      | 1.46 | No |
| 206059_at   | 7644           | ZNF91        | zinc finger protein 91 (HPF7, HTF10)                                                               | 2.27 | No |
| 220086_at   | 64376          | ZNFN1A5      | zinc finger protein, subfamily 1A, 5                                                               | 1.57 | No |
| 215263_at   | 158586 OR 7789 | ZXDA OR ZXDB | zinc finger, X-linked, duplicated A OR zinc finger, X-linked, duplicated B                         | 1.43 | No |
| 214807_at   | ---            | ---          | MRNA; cDNA DKFZp564O0862 (from clone DKFZp564O0862)                                                | 1.64 | No |
| 217606_at   | 284972         | ---          | MRNA; cDNA DKFZp686P24158 (from clone DKFZp686P24158)                                              | 1.84 | No |
| 213156_at   | ---            | ---          | MRNA; cDNA DKFZp586B211 (from clone DKFZp586B211) OR Homo sapiens, clone IMAGE:                    | 1.86 | No |
| 43511_s_at  | 220018         | ---          | MRNA; cDNA DKFZp762M127 (from clone DKFZp762M127)                                                  | 1.62 | No |
| 215262_at   | ---            | ---          | Clone 24629 mRNA sequence                                                                          | 2.05 | No |
| 212920_at   | ---            | ---          | <i>Transcribed sequence with weak similarity to protein ref.NP_060312.1 (H.sapiens) hypothetic</i> | 1.39 | No |
| 213158_at   | ---            | ---          | MRNA; cDNA DKFZp586B211 (from clone DKFZp586B211)                                                  | 1.77 | No |
| 215307_at   | ---            | ---          | MRNA full length insert cDNA clone EUROIMAGE 31619                                                 | 1.50 | No |
