# Supplementary material
Source: PubMed Central journal article supplement (PMC1866039)
Supplement: jvirol_81_7_3477__3.pdf [file jvirol_81_7_3477__3.pdf]

Supplemental Table 3a. Interferon stimulated genes identified in the CD4+ T cells

| Affymetrix Probe ID | Entrez Gene Symbol | Entrez Gene ID | Gene                                                                                        |
|---------------------|--------------------|----------------|---------------------------------------------------------------------------------------------|
| 206133_at           | BIRC4BP            | 54739          | XIAP associated factor-1                                                                    |
| 212643_at           | C14orf32           | 93487          | chromosome 14 open reading frame 32                                                         |
| 212644_s_at         | C14orf32           | 93487          | chromosome 14 open reading frame 32                                                         |
| 206011_at           | CASP1              | 834            | caspase 1, apoptosis-related cysteine peptidase (interleukin 1, beta, convertase)           |
| 209970_x_at         | CASP1              | 834            | caspase 1, apoptosis-related cysteine peptidase (interleukin 1, beta, convertase)           |
| 211366_x_at         | CASP1              | 834            | caspase 1, apoptosis-related cysteine peptidase (interleukin 1, beta, convertase)           |
| 211367_s_at         | CASP1              | 834            | caspase 1, apoptosis-related cysteine peptidase (interleukin 1, beta, convertase)           |
| 211368_s_at         | CASP1              | 834            | caspase 1, apoptosis-related cysteine peptidase (interleukin 1, beta, convertase)           |
| 213294_at           | CCDC75             | 253635         | Coiled-coil domain containing 75                                                            |
| 205098_at           | CCR1               | 1230           | chemokine (C-C motif) receptor 1                                                            |
| 206991_s_at         | CCR5               | 1234           | chemokine (C-C motif) receptor 5                                                            |
| 205692_s_at         | CD38               | 952            | CD38 antigen (p45)                                                                          |
| 221081_s_at         | DENND2D            | 79961          | DENN/MADD domain containing 2D                                                              |
| 210231_s_at         | ENO1               | 2023           | enolase 1, (alpha)                                                                          |
| 218986_s_at         | FLJ20035           | 55601          | hypothetical protein FLJ20035                                                               |
| 205483_s_at         | G1P2               | 9636           | interferon, alpha-inducible protein (clone IFI-15K)                                         |
| 204415_at           | G1P3               | 2537           | interferon, alpha-inducible protein (clone IFI-6-16)                                        |
| 202269_x_at         | GBP1               | 2633           | guanylate binding protein 1, interferon-inducible, 67kDa OR guanylate binding protein 1, i  |
| 202270_at           | GBP1               | 2633           | guanylate binding protein 1, interferon-inducible, 67kDa OR guanylate binding protein 1, i  |
| 210046_s_at         | IDH2               | 3418           | isocitrate dehydrogenase 2 (NADP+), mitochondrial                                           |
| 206332_s_at         | IFI16              | 3428           | interferon, gamma-inducible protein 16                                                      |
| 208965_s_at         | IFI16              | 3428           | interferon, gamma-inducible protein 16                                                      |
| 208966_x_at         | IFI16              | 3428           | interferon, gamma-inducible protein 16                                                      |
| 202411_at           | IFI27              | 3429           | interferon, alpha-inducible protein 27                                                      |
| 209417_s_at         | IFI35              | 3430           | interferon-induced protein 35                                                               |
| 214059_at           | IFI44              | 10561          | Interferon-induced protein 44                                                               |
| 214453_s_at         | IFI44              | 10561          | interferon-induced protein 44                                                               |
| 204439_at           | IFI44L             | 10964          | interferon-induced protein 44-like                                                          |
| 203153_at           | IFIT1              | 3434           | interferon-induced protein with tetratricopeptide repeats 1 OR interferon-induced protein v |
| 208436_s_at         | IRF7               | 3665           | interferon regulatory factor 7                                                              |
| 204698_at           | ISG20              | 3669           | interferon stimulated exonuclease gene 20kDa                                                |
| 33304_at            | ISG20              | 3669           | interferon stimulated exonuclease gene 20kDa                                                |
| 205569_at           | LAMP3              | 27074          | lysosomal-associated membrane protein 3                                                     |
| 217933_s_at         | LAP3               | 51056          | leucine aminopeptidase 3                                                                    |
| 200923_at           | LGALS3BP           | 3959           | lectin, galactoside-binding, soluble, 3 binding protein                                     |
| 202145_at           | LY6E               | 4061           | lymphocyte antigen 6 complex, locus E                                                       |
| 36711_at            | MAFF               | 23764          | v-maf musculoaponeurotic fibrosarcoma oncogene homolog F (avian)                            |
| 201755_at           | MCM5               | 4174           | MCM5 minichromosome maintenance deficient 5, cell division cycle 46 (S. cerevisiae)         |
| 216237_s_at         | MCM5               | 4174           | MCM5 minichromosome maintenance deficient 5, cell division cycle 46 (S. cerevisiae)         |
| 213629_x_at         | MT1F               | 4494           | metallothionein 1F (functional)                                                             |
| 217165_x_at         | MT1F               | 4494           | metallothionein 1F (functional)                                                             |
| 202086_at           | MX1                | 4599           | myxovirus (influenza virus) resistance 1, interferon-inducible protein p78 (mouse) OR my    |
| 205552_s_at         | OAS1               | 4938           | 2',5'-oligoadenylate synthetase 1, 40/46kDa                                                 |
| 204972_at           | OAS2               | 4939           | 2',5'-oligoadenylate synthetase 2, 69/71kDa                                                 |
| 206553_at           | OAS2               | 4939           | 2',5'-oligoadenylate synthetase 2, 69/71kDa                                                 |
| 218400_at           | OAS3               | 4940           | 2',5'-oligoadenylate synthetase 3, 100kDa                                                   |
| 205660_at           | OASL               | 8638           | 2',5'-oligoadenylate synthetase-like                                                        |
| 210797_s_at         | OASL               | 8638           | 2',5'-oligoadenylate synthetase-like                                                        |
| 202430_s_at         | PLSCR1             | 5359           | phospholipid scramblase 1                                                                   |
| 202446_s_at         | PLSCR1             | 5359           | phospholipid scramblase 1                                                                   |
| 208680_at           | PRDX1              | 5052           | peroxiredoxin 1                                                                             |
| 201676_x_at         | PSMA1              | 5682           | proteasome (prosome, macropain) subunit, alpha type, 1                                      |
| 210759_s_at         | PSMA1              | 5682           | proteasome (prosome, macropain) subunit, alpha type, 1                                      |
| 211746_x_at         | PSMA1              | 5682           | proteasome (prosome, macropain) subunit, alpha type, 1 OR proteasome (prosome, mac          |
| 201532_at           | PSMA3              | 5684           | proteasome (prosome, macropain) subunit, alpha type, 3                                      |
| 203396_at           | PSMA4              | 5685           | proteasome (prosome, macropain) subunit, alpha type, 4                                      |
| 201274_at           | PSMA5              | 5686           | proteasome (prosome, macropain) subunit, alpha type, 5                                      |
| 208805_at           | PSMA6              | 5687           | proteasome (prosome, macropain) subunit, alpha type, 6                                      |
| 202659_at           | PSMB10             | 5699           | proteasome (prosome, macropain) subunit, beta type, 10                                      |
| 200039_s_at         | PSMB2              | 5690           | proteasome (prosome, macropain) subunit, beta type, 2 OR proteasome (prosome, macr          |
| 209040_s_at         | PSMB8              | 5696           | proteasome (prosome, macropain) subunit, beta type, 8 (large multifunctional peptidase 7    |
| 211609_x_at         | PSMD4              | 5710           | proteasome (prosome, macropain) 26S subunit, non-ATPase, 4 OR proteasome (prosom            |
| 200814_at           | PSME1              | 5720           | proteasome (prosome, macropain) activator subunit 1 (PA28 alpha)                            |
| 201762_s_at         | PSME2              | 5721           | proteasome (prosome, macropain) activator subunit 2 (PA28 beta)                             |
| 204070_at           | RARRES3            | 5920           | retinoic acid receptor responder (tazarotene induced) 3                                     |
| 218117_at           | RBX1               | 9978           | ring-box 1                                                                                  |
| 212922_s_at         | SMYD2              | 56950          | SET and MYND domain containing 2                                                            |
| 210001_s_at         | SOCS1              | 8651           | suppressor of cytokine signaling 1                                                          |
| 202307_s_at         | TAP1               | 6890           | transporter 1, ATP-binding cassette, sub-family B (MDR/TAP)                                 |
| 35254_at            | TRAFD1             | 10906          | TRAF-type zinc finger domain containing 1                                                   |
| 201649_at           | UBE2L6             | 9246           | ubiquitin-conjugating enzyme E2L 6                                                          |
| 219211_at           | USP18              | 11274          | ubiquitin specific peptidase 18                                                             |

Supplemental Table 3b. Interferon stimulated genes identified in the CD8+ T cells

| Affymetrix Probe ID | Entrez Gene Symbol | Entrez Gene ID | Gene                                                                              |
|---------------------|--------------------|----------------|-----------------------------------------------------------------------------------|
| 206133_at           | BIRC4BP            | 54739          | XIAP associated factor-1                                                          |
| 212643_at           | C14orf32           | 93487          | chromosome 14 open reading frame 32                                               |
| 212644_s_at         | C14orf32           | 93487          | chromosome 14 open reading frame 32                                               |
| 206011_at           | CASP1              | 834            | caspase 1, apoptosis-related cysteine peptidase (interleukin 1, beta, convertase) |

| Probe ID    | Gene Symbol | Entrez Gene ID | Gene                                                                                          |
|-------------|-------------|----------------|-----------------------------------------------------------------------------------------------|
| 209970_x_at | CASP1       | 834            | ISGs CD4<br>caspase 1, apoptosis-related cysteine peptidase (interleukin 1, beta, convertase) |
| 211366_x_at | CASP1       | 834            | caspase 1, apoptosis-related cysteine peptidase (interleukin 1, beta, convertase)             |
| 211367_s_at | CASP1       | 834            | caspase 1, apoptosis-related cysteine peptidase (interleukin 1, beta, convertase)             |
| 211368_s_at | CASP1       | 834            | caspase 1, apoptosis-related cysteine peptidase (interleukin 1, beta, convertase)             |
| 213294_at   | CCDC75      | 253635         | Coiled-coil domain containing 75                                                              |
| 205098_at   | CCR1        | 1230           | chemokine (C-C motif) receptor 1                                                              |
| 205099_s_at | CCR1        | 1230           | chemokine (C-C motif) receptor 1                                                              |
| 206991_s_at | CCR5        | 1234           | chemokine (C-C motif) receptor 5                                                              |
| 205692_s_at | CD38        | 952            | CD38 antigen (p45)                                                                            |
| 221081_s_at | DENN2D      | 79961          | DENN/MADD domain containing 2D                                                                |
| 201231_s_at | ENO1        | 2023           | enolase 1, (alpha)                                                                            |
| 218986_s_at | FLJ20035    | 55601          | hypothetical protein FLJ20035                                                                 |
| 205483_s_at | G1P2        | 9636           | interferon, alpha-inducible protein (clone IFI-15K)                                           |
| 204415_at   | G1P3        | 2537           | interferon, alpha-inducible protein (clone IFI-6-16)                                          |
| 202269_x_at | GBP1        | 2633           | guanylate binding protein 1, interferon-inducible, 67kDa OR guanylate binding protein 1, i    |
| 202270_at   | GBP1        | 2633           | guanylate binding protein 1, interferon-inducible, 67kDa OR guanylate binding protein 1, i    |
| 210046_s_at | IDH2        | 3418           | isocitrate dehydrogenase 2 (NADP+), mitochondrial                                             |
| 206332_s_at | IFI16       | 3428           | interferon, gamma-inducible protein 16                                                        |
| 208965_s_at | IFI16       | 3428           | interferon, gamma-inducible protein 16                                                        |
| 208966_x_at | IFI16       | 3428           | interferon, gamma-inducible protein 16                                                        |
| 202411_at   | IFI27       | 3429           | interferon, alpha-inducible protein 27                                                        |
| 209417_s_at | IFI35       | 3430           | interferon-induced protein 35                                                                 |
| 214059_at   | IFI44       | 10561          | Interferon-induced protein 44                                                                 |
| 214453_s_at | IFI44       | 10561          | interferon-induced protein 44                                                                 |
| 204439_at   | IFI44L      | 10964          | interferon-induced protein 44-like                                                            |
| 203153_at   | IFIT1       | 3434           | interferon-induced protein with tetratricopeptide repeats 1 OR interferon-induced protein v   |
| 208436_s_at | IRF7        | 3665           | interferon regulatory factor 7                                                                |
| 204698_at   | ISG20       | 3669           | interferon stimulated exonuclease gene 20kDa                                                  |
| 33304_at    | ISG20       | 3669           | interferon stimulated exonuclease gene 20kDa                                                  |
| 205569_at   | LAMP3       | 27074          | lysosomal-associated membrane protein 3                                                       |
| 217933_s_at | LAP3        | 51056          | leucine aminopeptidase 3                                                                      |
| 200923_at   | LGALS3BP    | 3959           | lectin, galactoside-binding, soluble, 3 binding protein                                       |
| 202145_at   | LY6E        | 4061           | lymphocyte antigen 6 complex, locus E                                                         |
| 36711_at    | MAFF        | 23764          | v-maf musculoaponeurotic fibrosarcoma oncogene homolog F (avian)                              |
| 201755_at   | MCM5        | 4174           | MCM5 minichromosome maintenance deficient 5, cell division cycle 46 (S. cerevisiae)           |
| 216237_s_at | MCM5        | 4174           | MCM5 minichromosome maintenance deficient 5, cell division cycle 46 (S. cerevisiae)           |
| 213629_x_at | MT1F        | 4494           | metallothionein 1F (functional)                                                               |
| 217165_x_at | MT1F        | 4494           | metallothionein 1F (functional)                                                               |
| 202086_at   | MX1         | 4599           | myxovirus (influenza virus) resistance 1, interferon-inducible protein p78 (mouse) OR my      |
| 205552_s_at | OAS1        | 4938           | 2',5'-oligoadenylate synthetase 1, 40/46kDa                                                   |
| 204972_at   | OAS2        | 4939           | 2'-5'-oligoadenylate synthetase 2, 69/71kDa                                                   |
| 206553_at   | OAS2        | 4939           | 2'-5'-oligoadenylate synthetase 2, 69/71kDa                                                   |
| 218400_at   | OAS3        | 4940           | 2'-5'-oligoadenylate synthetase 3, 100kDa                                                     |
| 205660_at   | OASL        | 8638           | 2'-5'-oligoadenylate synthetase-like                                                          |
| 210797_s_at | OASL        | 8638           | 2'-5'-oligoadenylate synthetase-like                                                          |
| 202430_s_at | PLSCR1      | 5359           | phospholipid scramblase 1                                                                     |
| 202446_s_at | PLSCR1      | 5359           | phospholipid scramblase 1                                                                     |
| 208680_at   | PRDX1       | 5052           | peroxiredoxin 1                                                                               |
| 201676_x_at | PSMA1       | 5682           | proteasome (prosome, macropain) subunit, alpha type, 1                                        |
| 210759_s_at | PSMA1       | 5682           | proteasome (prosome, macropain) subunit, alpha type, 1                                        |
| 211746_x_at | PSMA1       | 5682           | proteasome (prosome, macropain) subunit, alpha type, 1 OR proteasome (prosome, mac            |
| 201532_at   | PSMA3       | 5684           | proteasome (prosome, macropain) subunit, alpha type, 3                                        |
| 203396_at   | PSMA4       | 5685           | proteasome (prosome, macropain) subunit, alpha type, 4                                        |
| 201274_at   | PSMA5       | 5686           | proteasome (prosome, macropain) subunit, alpha type, 5                                        |
| 208805_at   | PSMA6       | 5687           | proteasome (prosome, macropain) subunit, alpha type, 6                                        |
| 202659_at   | PSMB10      | 5699           | proteasome (prosome, macropain) subunit, beta type, 10                                        |
| 200039_s_at | PSMB2       | 5690           | proteasome (prosome, macropain) subunit, beta type, 2 OR proteasome (prosome, macrop          |
| 209040_s_at | PSMB8       | 5696           | proteasome (prosome, macropain) subunit, beta type, 8 (large multifunctional peptidase 7      |
| 211609_x_at | PSMD4       | 5710           | proteasome (prosome, macropain) 26S subunit, non-ATPase, 4 OR proteasome (prosom              |
| 200814_at   | PSME1       | 5720           | proteasome (prosome, macropain) activator subunit 1 (PA28 alpha)                              |
| 201762_s_at | PSME2       | 5721           | proteasome (prosome, macropain) activator subunit 2 (PA28 beta)                               |
| 204070_at   | RARRES3     | 5920           | retinoic acid receptor responder (tazarotene induced) 3                                       |
| 218117_at   | RBX1        | 9978           | ring-box 1                                                                                    |
| 212922_s_at | SMYD2       | 56950          | SET and MYND domain containing 2                                                              |
| 210001_s_at | SOCS1       | 8651           | suppressor of cytokine signaling 1                                                            |
| 202307_s_at | TAP1        | 6890           | transporter 1, ATP-binding cassette, sub-family B (MDR/TAP)                                   |
| 35254_at    | TRAFD1      | 10906          | TRAF-type zinc finger domain containing 1                                                     |
| 201649_at   | UBE2L6      | 9246           | ubiquitin-conjugating enzyme E2L 6                                                            |
| 219211_at   | USP18       | 11274          | ubiquitin specific peptidase 18                                                               |

Supplemental Table 3c. Thymocyte differentiation markers from Lee et. al. study

| Affymetrix Probe ID | Entrez Gene Symbol   | Entrez Gene ID  | Gene                                                              | * |
|---------------------|----------------------|-----------------|-------------------------------------------------------------------|---|
| 204639_at           | ADA                  | 100             | adenosine deaminase                                               | * |
| 216705_s_at         | ADA                  | 100             | adenosine deaminase                                               | * |
| 202760_s_at         | AKAP2 OR PALM2-AKAP2 | 11217 OR 445815 | A kinase (PRKA) anchor protein 2 OR PALM2-AKAP2 protein           | * |
| 202095_s_at         | BIRC5                | 332             | baculoviral IAP repeat-containing 5 (survivin)                    | * |
| 203755_at           | BUB1B                | 701             | BUB1 budding uninhibited by benzimidazoles 1 homolog beta (yeast) | * |
| 214710_s_at         | CCNB1                | 891             | cyclin B1                                                         | * |
| 202705_at           | CCNB2                | 9133            | cyclin B2                                                         | * |
| 208592_s_at         | CD1E                 | 913             | CD1E antigen, e polypeptide OR CD1E antigen, e polypeptide        | * |
| 201028_s_at         | CD99                 | 4267            | CD99 antigen                                                      | * |
| 201029_s_at         | CD99                 | 4267            | CD99 antigen                                                      | * |

| Gene ID     | Gene Name   | Accession | Description                                                                  | Category |
|-------------|-------------|-----------|------------------------------------------------------------------------------|----------|
| 203213_at   | CDC2        | 983       | ISGs CD4                                                                     | *        |
| 203214_x_at | CDC2        | 983       | Cell division cycle 2, G1 to S and G2 to M                                   | *        |
| 210559_s_at | CDC2        | 983       | cell division cycle 2, G1 to S and G2 to M                                   | *        |
| 209714_s_at | CDKN3       | 1033      | cell division cycle 2, G1 to S and G2 to M                                   | *        |
| 204962_s_at | CENPA       | 1058      | cyclin-dependent kinase inhibitor 3 (CDK2-associated dual specificity phosph | *        |
| 210821_x_at | CENPA       | 1058      | centromere protein A, 17kDa                                                  | *        |
| 219036_at   | Cep70       | 80321     | centromere protein A, 17kDa                                                  | *        |
| 204170_s_at | CKS2        | 1164      | p10-binding protein                                                          | *        |
| 203764_at   | DLG7        | 9787      | CDC28 protein kinase regulatory subunit 2                                    | *        |
| 208370_s_at | DSCR1       | 1827      | discs, large homolog 7 (Drosophila)                                          | *        |
| 215253_s_at | DSCR1       | 1827      | Down syndrome critical region gene 1                                         | *        |
| 218585_s_at | DTL         | 51514     | Down syndrome critical region gene 1                                         | *        |
| 220643_s_at | FAIM        | 55179     | denticleless homolog (Drosophila)                                            | *        |
| 218313_s_at | GALNT7      | 51809     | Fas apoptotic inhibitory molecule                                            | *        |
| 206589_at   | GFI1        | 2672      | UDP-N-acetyl-alpha-D-galactosamine:polypeptide N-acetylgalactosaminyltr      | *        |
| 203560_at   | GGH         | 8836      | growth factor independent 1                                                  | *        |
| 205349_at   | GNA15       | 2769      | gamma-glutamyl hydrolase (conjugase, folylpolygammaglutamyl hydrolase)       | *        |
| 218662_s_at | HCAP-G      | 64151     | guanine nucleotide binding protein (G protein), alpha 15 (Gq class)          | *        |
| 218663_at   | HCAP-G      | 64151     | chromosome condensation protein G                                            | *        |
| 203744_at   | HMGB3       | 3149      | chromosome condensation protein G                                            | *        |
| 207165_at   | HMMR        | 3161      | high-mobility group box 3                                                    | *        |
| 209709_s_at | HMMR        | 3161      | hyaluronan-mediated motility receptor (RHAMM)                                | *        |
| 204444_at   | KIF11       | 3832      | hyaluronan-mediated motility receptor (RHAMM)                                | *        |
| 219306_at   | KIF15       | 56992     | kinesin family member 11                                                     | *        |
| 209408_at   | KIF2C       | 11004     | kinesin family member 15                                                     | *        |
| 211519_s_at | KIF2C       | 11004     | kinesin family member 2C                                                     | *        |
| 204162_at   | KNTC2       | 10403     | kinesin family member 2C                                                     | *        |
| 202107_s_at | MCM2        | 4171      | kinetochore associated 2                                                     | *        |
| 204825_at   | MELK        | 9833      | MCM2 minichromosome maintenance deficient 2, mitotin (S. cerevisiae)         | *        |
| 202974_at   | MPP1        | 4354      | maternal embryonic leucine zipper kinase                                     | *        |
| 204798_at   | MYB         | 4602      | membrane protein, palmitoylated 1, 55kDa                                     | *        |
| 204641_at   | NEK2        | 4751      | v-myb myeloblastosis viral oncogene homolog (avian)                          | *        |
| 211080_s_at | NEK2        | 4751      | NIMA (never in mitosis gene a)-related kinase 2                              | *        |
| 218039_at   | NUSAP1      | 51203     | NIMA (never in mitosis gene a)-related kinase 2 OR NIMA (never in mitosis g  | *        |
| 219978_s_at | NUSAP1      | 51203     | nucleolar and spindle associated protein 1                                   | *        |
| 213599_at   | OIP5        | 11339     | nucleolar and spindle associated protein 1                                   | *        |
| 202759_s_at | PALM2-AKAP2 | 445815    | Opa interacting protein 5                                                    | *        |
| 219148_at   | PBK         | 55872     | PALM2-AKAP2 protein                                                          | *        |
| 206344_at   | PON1        | 5444      | PDZ binding kinase                                                           | *        |
| 218009_s_at | PRC1        | 9055      | paraoxonase 1                                                                | *        |
| 203554_x_at | PTTG1       | 9232      | protein regulator of cytokinesis 1                                           | *        |
| 204146_at   | RAD51AP1    | 10635     | pituitary tumor-transforming 1                                               | *        |
| 201890_at   | RRM2        | 6241      | RAD51 associated protein 1                                                   | *        |
| 209773_s_at | RRM2        | 6241      | ribonucleotide reductase M2 polypeptide                                      | *        |
| 209610_s_at | SLC1A4      | 6509      | ribonucleotide reductase M2 polypeptide                                      | *        |
| 212810_s_at | SLC1A4      | 6509      | solute carrier family 1 (glutamate/neutral amino acid transporter), member 4 | *        |
| 212811_x_at | SLC1A4      | 6509      | solute carrier family 1 (glutamate/neutral amino acid transporter), member 4 | *        |
| 208079_s_at | STK6        | 6790      | solute carrier family 1 (glutamate/neutral amino acid transporter), member 4 | *        |
| 203588_s_at | TFDP2       | 7029      | serine/threonine kinase 6                                                    | *        |
| 203589_s_at | TFDP2       | 7029      | transcription factor Dp-2 (E2F dimerization partner 2)                       | *        |
| 205347_s_at | TMSL8       | 11013     | transcription factor Dp-2 (E2F dimerization partner 2)                       | *        |
| 201291_s_at | TOP2A       | 7153      | thymosin-like 8                                                              | *        |
| 201292_at   | TOP2A       | 7153      | topoisomerase (DNA) II alpha 170kDa                                          | *        |
| 204822_at   | TTK         | 7272      | topoisomerase (DNA) II alpha 170kDa                                          | *        |
| 208977_x_at | TUBB2       | 10383     | TTK protein kinase                                                           | *        |
| 213726_x_at | TUBB2       | 10383     | tubulin, beta, 2                                                             | *        |
| 202589_at   | TYMS        | 7298      | tubulin, beta, 2                                                             | *        |
| 202954_at   | UBE2C       | 11065     | thymidylate synthetase                                                       | *        |
| 209053_s_at | WHSC1       | 7468      | ubiquitin-conjugating enzyme E2C                                             | *        |
| 209054_s_at | WHSC1       | 7468      | Wolf-Hirschhorn syndrome candidate 1                                         | *        |
| 208636_at   | ACTN1       | 87        | Wolf-Hirschhorn syndrome candidate 1                                         | *        |
| 208637_x_at | ACTN1       | 87        | Actinin, alpha 1                                                             | *        |
| 211160_x_at | ACTN1       | 87        | actinin, alpha 1                                                             | *        |
| 206385_s_at | ANK3        | 288       | actinin, alpha 1                                                             | *        |
| 207950_s_at | ANK3        | 288       | ankyrin 3, node of Ranvier (ankyrin G)                                       | *        |
| 209442_x_at | ANK3        | 288       | ankyrin 3, node of Ranvier (ankyrin G)                                       | *        |
| 215314_at   | ANK3        | 288       | ankyrin 3, node of Ranvier (ankyrin G)                                       | *        |
| 206337_at   | CCR7        | 1236      | ankyrin 3, node of Ranvier (ankyrin G)                                       | *        |
| 204489_s_at | CD44        | 960       | chemokine (C-C motif) receptor 7 OR chemokine (C-C motif) receptor 7         | *        |
| 204490_s_at | CD44        | 960       | CD44 antigen (homing function and Indian blood group system)                 | *        |
| 209835_x_at | CD44        | 960       | CD44 antigen (homing function and Indian blood group system)                 | *        |
| 210916_s_at | CD44        | 960       | CD44 antigen (homing function and Indian blood group system)                 | *        |
| 212014_x_at | CD44        | 960       | CD44 antigen (homing function and Indian blood group system)                 | *        |
| 212063_at   | CD44        | 960       | CD44 antigen (homing function and Indian blood group system)                 | *        |
| 216062_at   | CD44        | 960       | CD44 antigen (homing function and Indian blood group system)                 | *        |
| 217523_at   | CD44        | 960       | CD44 antigen (Indian blood group)                                            | *        |
| 213295_at   | CYLD        | 1540      | CD44 antigen (homing function and Indian blood group system)                 | *        |
| 214272_at   | CYLD        | 1540      | Cylindromatosis (turban tumor syndrome)                                      | *        |
| 221903_s_at | CYLD        | 1540      | Cylindromatosis (turban tumor syndrome)                                      | *        |
| 221905_at   | CYLD        | 1540      | cylindromatosis (turban tumor syndrome)                                      | *        |
| 222142_at   | CYLD        | 1540      | cylindromatosis (turban tumor syndrome)                                      | *        |
| 39582_at    | CYLD        | 1540      | Cylindromatosis (turban tumor syndrome)                                      | *        |
| 60084_at    | CYLD        | 1540      | cylindromatosis (turban tumor syndrome)                                      | *        |

| Gene ID     | Gene Name                                    | Accession     | Description                                                                                 |
|-------------|----------------------------------------------|---------------|---------------------------------------------------------------------------------------------|
| 205419_at   | EBI2                                         | 1880          | ISGs CD4                                                                                    |
| 204642_at   | EDG1                                         | 1901          | Epstein-Barr virus induced gene 2 (lymphocyte-specific G protein-coupled receptor)          |
| 203729_at   | EMP3                                         | 2014          | endothelial differentiation, sphingolipid G-protein-coupled receptor, 1                     |
| 202723_s_at | FOXO1A                                       | 2308          | epithelial membrane protein 3                                                               |
| 202724_s_at | FOXO1A                                       | 2308          | forkhead box O1A (rhabdomyosarcoma)                                                         |
| 202748_at   | GBP2                                         | 2634          | forkhead box O1A (rhabdomyosarcoma)                                                         |
| 219243_at   | GIMAP4                                       | 55303         | guanylate binding protein 2, interferon-inducible OR guanylate binding protein 2, interfero |
| 207651_at   | GPR171                                       | 29909         | GTPase, IMAP family member 4                                                                |
| 206082_at   | HCP5                                         | 10866         | G protein-coupled receptor 171                                                              |
| 213932_x_at | HLA-A                                        | 3105          | HLA complex P5                                                                              |
| 215313_x_at | HLA-A                                        | 3105          | Major histocompatibility complex, class I, A                                                |
| 208729_x_at | HLA-B                                        | 3106          | major histocompatibility complex, class I, A                                                |
| 209140_x_at | HLA-B                                        | 3106          | major histocompatibility complex, class I, B                                                |
| 211911_x_at | HLA-B                                        | 3106          | major histocompatibility complex, class I, B OR major histocompatibility complex, class I,  |
| 208812_x_at | HLA-C                                        | 3107          | major histocompatibility complex, class I, C                                                |
| 211799_x_at | HLA-C                                        | 3107          | major histocompatibility complex, class I, C                                                |
| 214459_x_at | HLA-C                                        | 3107          | major histocompatibility complex, class I, C                                                |
| 216526_x_at | HLA-C                                        | 3107          | major histocompatibility complex, class I, C                                                |
| 200904_at   | HLA-E                                        | 3133          | major histocompatibility complex, class I, E                                                |
| 200905_x_at | HLA-E                                        | 3133          | major histocompatibility complex, class I, E                                                |
| 217456_x_at | HLA-E                                        | 3133          | major histocompatibility complex, class I, E                                                |
| 204806_x_at | HLA-F                                        | 3134          | major histocompatibility complex, class I, E                                                |
| 221875_x_at | HLA-F                                        | 3134          | major histocompatibility complex, class I, F                                                |
| 221978_at   | HLA-F                                        | 3134          | major histocompatibility complex, class I, F                                                |
| 202098_s_at | HRMT1L1                                      | 3275          | major histocompatibility complex, class I, F                                                |
| 221564_at   | HRMT1L1                                      | 3275          | HMT1 hnRNP methyltransferase-like 1 (S. cerevisiae)                                         |
| 201565_s_at | ID2                                          | 3398          | HMT1 hnRNP methyltransferase-like 1 (S. cerevisiae)                                         |
| 201566_x_at | ID2 OR ID2B                                  | 3398 OR 84099 | inhibitor of DNA binding 2, dominant negative helix-loop-helix protein                      |
| 213931_at   | ID2 OR ID2B                                  | 3398 OR 84099 | inhibitor of DNA binding 2, dominant negative helix-loop-helix protein OR inhibitor of DNA  |
| 201315_x_at | IFITM2                                       | 10581         | inhibitor of DNA binding 2, dominant negative helix-loop-helix protein OR inhibitor of DNA  |
| 205926_at   | IL27RA                                       | 9466          | interferon induced transmembrane protein 2 (1-8D)                                           |
| 222062_at   | IL27RA                                       | 9466          | interleukin 27 receptor, alpha                                                              |
| 203233_at   | IL4R                                         | 3566          | interleukin 27 receptor, alpha                                                              |
| 205945_at   | IL6R                                         | 3570          | interleukin 4 receptor                                                                      |
| 217489_s_at | IL6R                                         | 3570          | interleukin 6 receptor OR interleukin 6 receptor                                            |
| 219371_s_at | KLF2                                         | 10365         | interleukin 6 receptor                                                                      |
| 221790_s_at | LDLRAP1                                      | 26119         | Kruppel-like factor 2 (lung)                                                                |
| 57082_at    | LDLRAP1                                      | 26119         | low density lipoprotein receptor adaptor protein 1                                          |
| 209840_s_at | LRRN3                                        | 54674         | low density lipoprotein receptor adaptor protein 1                                          |
| 209841_s_at | LRRN3                                        | 54674         | leucine rich repeat neuronal 3                                                              |
| 214180_at   | MAN1C1                                       | 57134         | leucine rich repeat neuronal 3                                                              |
| 218918_at   | MAN1C1                                       | 57134         | mannosidase, alpha, class 1C, member 1                                                      |
| 203413_at   | NELL2                                        | 4753          | mannosidase, alpha, class 1C, member 1                                                      |
| 211066_x_at | R PCDHGB2 OR PCDHGB1 C. OR 56105 OR 56106 OF |               | NEL-like 2 (chicken) OR NEL-like 2 (chicken)                                                |
| 215836_s_at | R PCDHGB2 OR PCDHGB1 C. OR 56105 OR 56106 OF |               | protocadherin gamma subfamily C, 3                                                          |
| 216069_at   | PRMT2                                        | 3275          | protocadherin gamma subfamily C, 3 OR protocadherin gamma subfamily B, 4 OR protoc          |
| 209606_at   | PSCDBP                                       | 9595          | Protein arginine methyltransferase 2                                                        |
| 209694_at   | PTS                                          | 5805          | pleckstrin homology, Sec7 and coiled-coil domains, binding protein OR pleckstrin homolo     |
| 217983_s_at | RNASET2                                      | 8635          | 6-pyruvoyltetrahydropterin synthase                                                         |
| 217984_at   | RNASET2                                      | 8635          | ribonuclease T2                                                                             |
| 220096_at   | RNASET2                                      | 8635          | ribonuclease T2                                                                             |
| 204502_at   | SAMHD1                                       | 25939         | ribonuclease T2                                                                             |
| 218793_s_at | SCML1                                        | 6322          | SAM domain and HD domain 1                                                                  |
| 46665_at    | SEMA4C                                       | 54910         | sex comb on midleg-like 1 (Drosophila)                                                      |
| 202497_x_at | SLC2A3                                       | 6515          | sema domain, immunoglobulin domain (Ig), transmembrane domain (TM) and short cytop          |
| 202498_s_at | SLC2A3                                       | 6515          | solute carrier family 2 (facilitated glucose transporter), member 3                         |
| 202499_s_at | SLC2A3                                       | 6515          | solute carrier family 2 (facilitated glucose transporter), member 3                         |
| 202693_s_at | STK17A                                       | 9263          | solute carrier family 2 (facilitated glucose transporter), member 3                         |
| 202695_s_at | STK17A                                       | 9263          | serine/threonine kinase 17a (apoptosis-inducing)                                            |
| 203386_at   | TBC1D4                                       | 9882          | serine/threonine kinase 17a (apoptosis-inducing)                                            |
| 203387_s_at | TBC1D4                                       | 9882          | TBC1 domain family, member 4                                                                |
| 211282_x_at | TNFRSF25                                     | 8718          | TBC1 domain family, member 4                                                                |
| 211841_s_at | TNFRSF25                                     | 8718          | tumor necrosis factor receptor superfamily, member 25                                       |
| 216042_at   | TNFRSF25                                     | 8718          | tumor necrosis factor receptor superfamily, member 25                                       |
| 219423_x_at | TNFRSF25                                     | 8718          | tumor necrosis factor receptor superfamily, member 25                                       |
| 210847_x_at | TNFRSF25 OR PLEKHG5                          | 57449 OR 8718 | tumor necrosis factor receptor superfamily, member 25                                       |
| 206150_at   | TNFRSF7                                      | 939           | tumor necrosis factor receptor superfamily, member 25 OR pleckstrin homology domain c       |
| 202687_s_at | TNFSF10                                      | 8743          | tumor necrosis factor receptor superfamily, member 7 OR tumor necrosis factor receptor      |
| 202688_at   | TNFSF10                                      | 8743          | tumor necrosis factor (ligand) superfamily, member 10 OR tumor necrosis factor (ligand) :   |
| 214329_x_at | TNFSF10                                      | 8743          | tumor necrosis factor (ligand) superfamily, member 10 OR tumor necrosis factor (ligand) :   |
| 212242_at   | TUBA1                                        | 7277          | tumor necrosis factor (ligand) superfamily, member 10 OR tumor necrosis factor (ligand) :   |
|             |                                              |               | tubulin, alpha 1 (testis specific)                                                          |
